# Supplementary material for: Nuclear AURKA acquires kinase-independent transactivating function to enhance breast cancer stem cell phenotype
Source: PubMed Central journal article supplement (PMC4735655; doi:10.1038/ncomms10180), 2016-01-19
Supplement: ncomms10180-s1.pdf [file ncomms10180-s1.pdf]

# Supplementary Figure and Figure Legend

## Supplementary Fig. 1

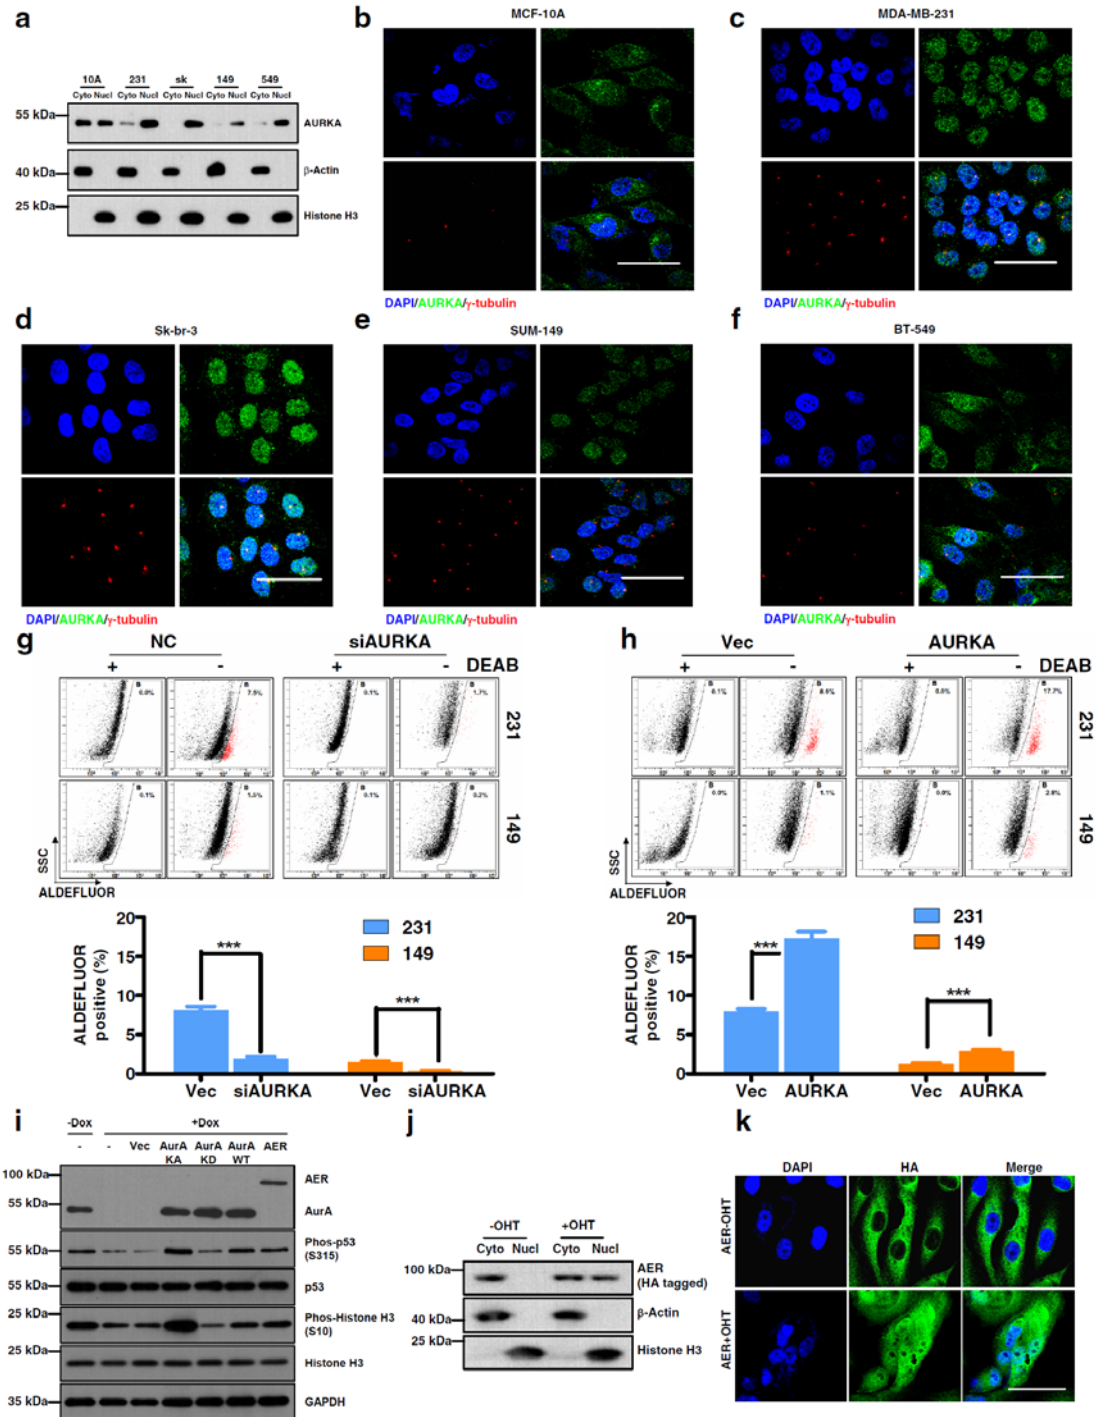

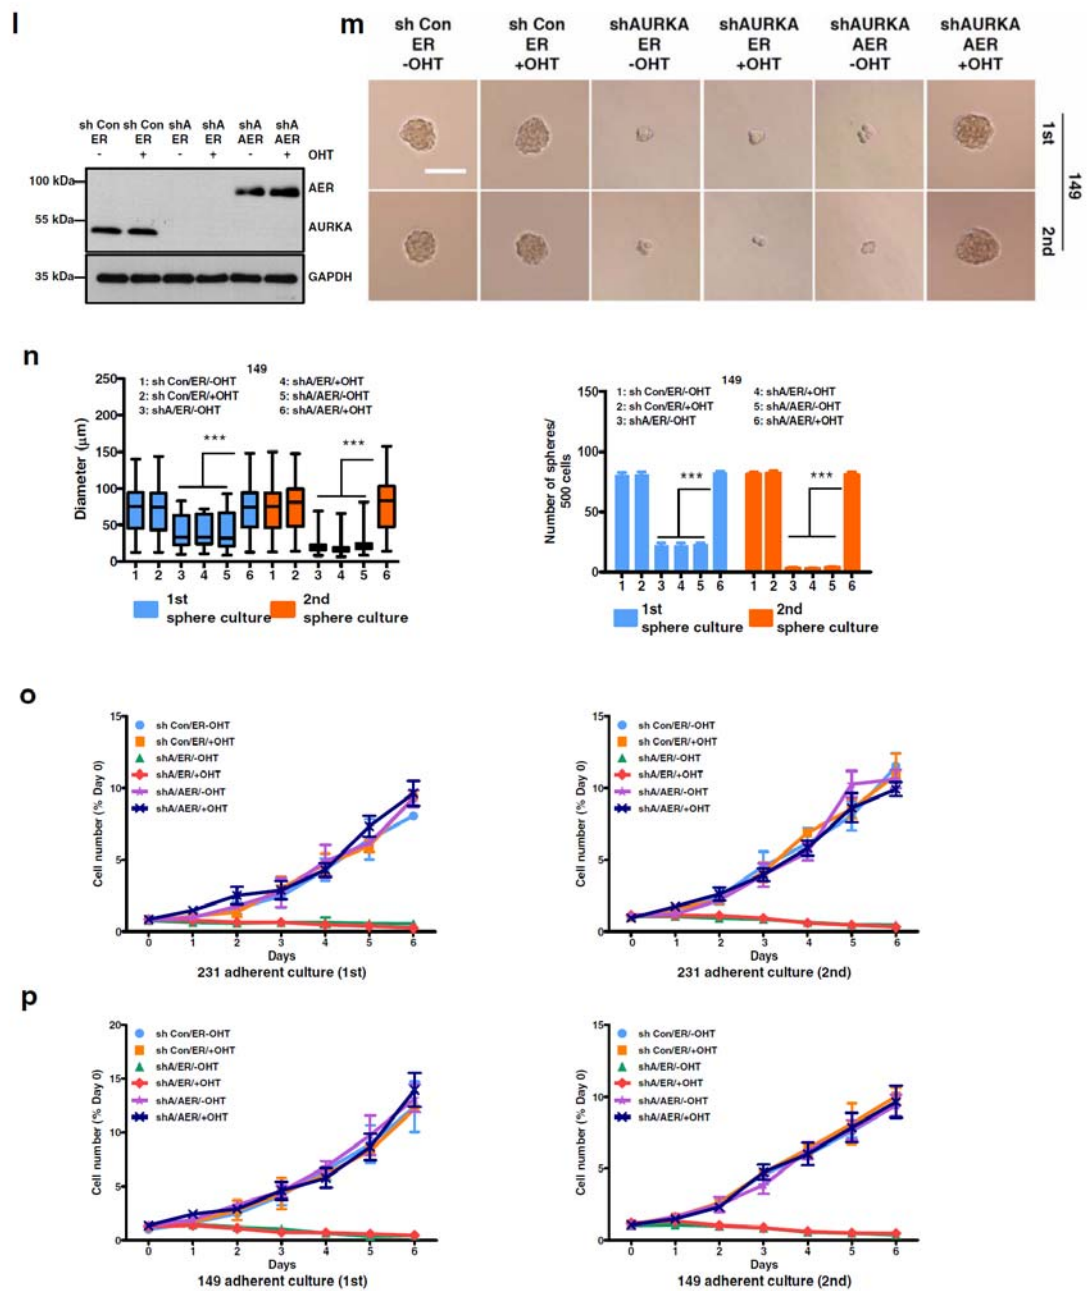

**Supplementary Fig. 1 Related to Fig. 1**

**(a)** MCF-10A (10A), MDA-MB-231 (231), Sk-br-3 (sk), SUM149 (149) and BT549 (549) cells in the exponential growth phase were harvested, and nuclear and cytoplasmic protein samples were isolated. The expression of Aurora A (AURKA),  $\beta$ -actin and histone H3 was determined via immunoblotting (IB).

**(b)-(f)** AURKA (green) distribution was analyzed via immunofluorescence (IF)

staining in MCF-10A (10A), MDA-MB-231 (231), Sk-br-3 (sk), SUM149 (149) and BT549 (549) cells in the exponential growth phase.  $\gamma$ -Tubulin (red) was used to indicate centrosome location. The nuclei were stained with DAPI (blue). Scale bar, 50  $\mu$ m.

**(g)** The treatment was similar to Fig. 1d. Cells were subjected to ALDEFUOR staining and analysis by flow cytometry.

**(h)** The treatment was similar to Fig. 1e. Cells were subjected to ALDEFUOR staining and analysis flow cytometry.

**(i)** MDA-MB-231 cells ( $2 \times 10^5$ ), which expressed shRNA against AURKA under the control of a Tet-inducible system, were treated with doxycycline for 24 h. Then, the cells were transfected with lentivirus expressing AURKA (WT, KA or KD) or the AURKA-ER (AER) fusion protein in the presence of doxycycline for 72 h. The cells were harvested for IB analysis.

**(j)** MDA-MB-231 cells ( $3 \times 10^6$ ) overexpressed AER via lentivirus-mediated gene transfer were treated with or without 200nM OHT treatment. Two days after transfection, the cells were selected using 1 $\mu$ g/ml puromycin for 2 days. The cytoplasmic and nuclear fractions were prepared and subjected to IB analysis.

**(k)** The cells subjected to treatment similar to that in (j) were fixed, and immunofluorescence (IF) staining was performed for HA (green). The nuclei were stained with DAPI (blue). Scale bar, 50  $\mu$ m.

**(l)** MDA-MB-231 cells ( $2 \times 10^5$ ) were transduced with shRNA vector (sh Control or shAURKA) and over-expression vector (ER or AER) via lentivirus-mediated gene

transfer. Two days after transfection, the cells were double-selected with 1  $\mu\text{g/ml}$  puromycin and 2  $\mu\text{g/ml}$  blasticidin for 2 days. The adherent cells were collected for IB analysis.

**(m)** SUM149 cells ( $2 \times 10^5$ ) were co-transfected with shRNA vector (sh Control or shAURKA) and the overexpression vector (ER or AER) via lentivirus-mediated gene transfer. Two days after transfection, the cells were double-selected using 1  $\mu\text{g/ml}$  puromycin and 2  $\mu\text{g/ml}$  blasticidin for 2 days. The resultant cells were used to perform first round mammosphere culture for 9 days (upper panel). At the end of the first round mammosphere culture, the cells were photographed. Then, the single suspension was prepared from sphere from the first round culture and subjected to second round mammosphere culture for 9 days (lower panel). At the end of the second round mammosphere culture, the cells were photographed. Scale bar, 100  $\mu\text{m}$ .

**(n)** Data from three independent experiments derived from (m) were used for quantitative analysis of the mammosphere size (diameter,  $\Phi$ ) and the mammosphere number. The left panel showed the distribution pattern of the mammosphere size from SUM149 cells (Kruskal-Wallis test followed by Dunn's Multiple Comparison test, \*\*\* $p < 0.001$ ). The right panel showed the number of mammosphere ( $\Phi > 60 \mu\text{m}$ ), the bars represented the means  $\pm$  SEM (ANOVA followed by the LSD test, \*\*\* $p < 0.001$ ).

**(o)** The cells in Fig. 1g used to perform two round mammosphere culture were subjected to a proliferation assay in conventional adherent culture by cell counting.

**(p)** The cells used in (m) to perform two round mammosphere culture were subjected to a proliferation in conventional adherent culture by cell counting.



MDA-MB-231 treated with 400 pmol and the corresponding control cell lines were subjected to RNA extraction. The expression of indicated genes were determined by realtime PCR. The bar represents means  $\pm$  SEM of three independent experiments (t test, \*:  $p \leq 0.05$ , \*\*:  $p \leq 0.01$ ).

**(d)** AURKA was down-regulated in MDA-MB-231 cells ( $2 \times 10^5$ ) by treatment with three different siRNA (60 pmol) for 48 h. The expression of AURKA, c-Myc and  $\beta$ -Actin mRNA was determined via semi-quantitative PCR. The bars represented the means  $\pm$  SEM of three independent experiments (ANOVA followed by the LSD test, \*\*\*:  $p \leq 0.001$ ).

**(e)** One  $\mu$ g of empty vector (Vec) or a vector expressing AURKA (WT, KA or KD) was transfected into  $5 \times 10^5$  MDA-MB-231 cells for 48 h. The expression of AURKA, c-Myc and  $\beta$ -Actin mRNA was determined via semi-quantitative PCR. The bars represented the means  $\pm$  SEM of three independent experiments (ANOVA followed by the LSD test, \*\*\*:  $p \leq 0.001$ ).

**(f) and (g)** SUM149 and BT549 cells ( $2 \times 10^5$ ) were treated with 60 pmol AURKA or scramble siRNA for 48 h. The expression of c-Myc and  $\beta$ -Actin mRNA was determined via semi-quantitative PCR, and AURKA and GAPDH were determined via IB. The bar represented the means  $\pm$  SEM of three independent experiments (ANOVA followed by the LSD test, \*:  $p \leq 0.05$ , \*\*:  $p \leq 0.01$ , \*\*\*:  $p \leq 0.001$ ).

**(h) and (i)** One  $\mu$ g of empty empty vector (Vec) or vector expressing AURKA (WT, KA or KD) was transfected into  $5 \times 10^5$  SUM149 and BT549 cells for 48 h. The expression of c-Myc and  $\beta$ -Actin mRNA was determined by semiquantitative PCR,

AURKA and GAPDH expression determined by IB. The bar represented the means  $\pm$  SEM of three independent experiments (ANOVA followed by the LSD test, \*\*:  $p \leq 0.01$ , \*\*\*:  $p \leq 0.001$ ).

(j) MDA-MB-231 cells ( $5 \times 10^5$ ) were treated with 60 pmol siRNA against AURKA or scramble for 48 h. Then, the cells were then treated with 100  $\mu\text{g/ml}$  cycloheximide (CHX) for the indicated period and were harvested for IB analysis. The expression of c-Myc and GAPDH was determined via IB (left panel). The IB results of c-Myc were quantified using Image J and were normalized to those of GAPDH. The normalized c-Myc expression level was used to construct a scatter plot (right panel). Linear regression was performed for statistical analysis.

(k) Scramble or AURKA siRNA (60 pmol) were transfected into  $5 \times 10^5$  MDA-MB-231 cells for 24 h. Then 0.5  $\mu\text{g}$  of *MYC* promoter or an empty basic reporter and 0.05  $\mu\text{g}$  of pRL-TK plasmid were co-transfected into MDA-MB-231 cells for another 24 h. Dual luciferase reporter assays were performed to evaluate *MYC* promoter activation. The bars represented the means  $\pm$  SEM of three independent experiments (ANOVA followed by the LSD test, \*\*\*:  $p \leq 0.001$ ).

(l) One  $\mu\text{g}$  of empty vector (Vec) or a vector expressing AURKA (WT, KA or KD), 0.5  $\mu\text{g}$  of *MYC* promoter reporter or a basic reporter and 0.05  $\mu\text{g}$  of pRL-TK plasmid were co-transfected into  $5 \times 10^5$  MDA-MB-231 cells for 24 h. Dual luciferase reporter assays were performed to evaluate *MYC* promoter activity. The bars represented the means  $\pm$  SEM of three independent experiments (ANOVA followed by the LSD test, \*\*:  $p \leq 0.01$ , \*\*\*:  $p \leq 0.001$ ).

**(m)** One  $\mu\text{g}$  of DBD/AURKA-DBD (WT, M1, M2 or M3) was transfected into  $5 \times 10^5$  293T cells. After 24 h, the cells were harvested for real time PCR analysis.

**(n)** BCSC and non-BCSC were isolated according to their side population level by flow cytometry. RNA of these cells was isolated and subjected to S1 nuclease protection assay to monitor the *MYC* P1 and P2 transcripts. The level of B2M mRNA in parallel identical samples were also determined.



Supplementary Fig. 3

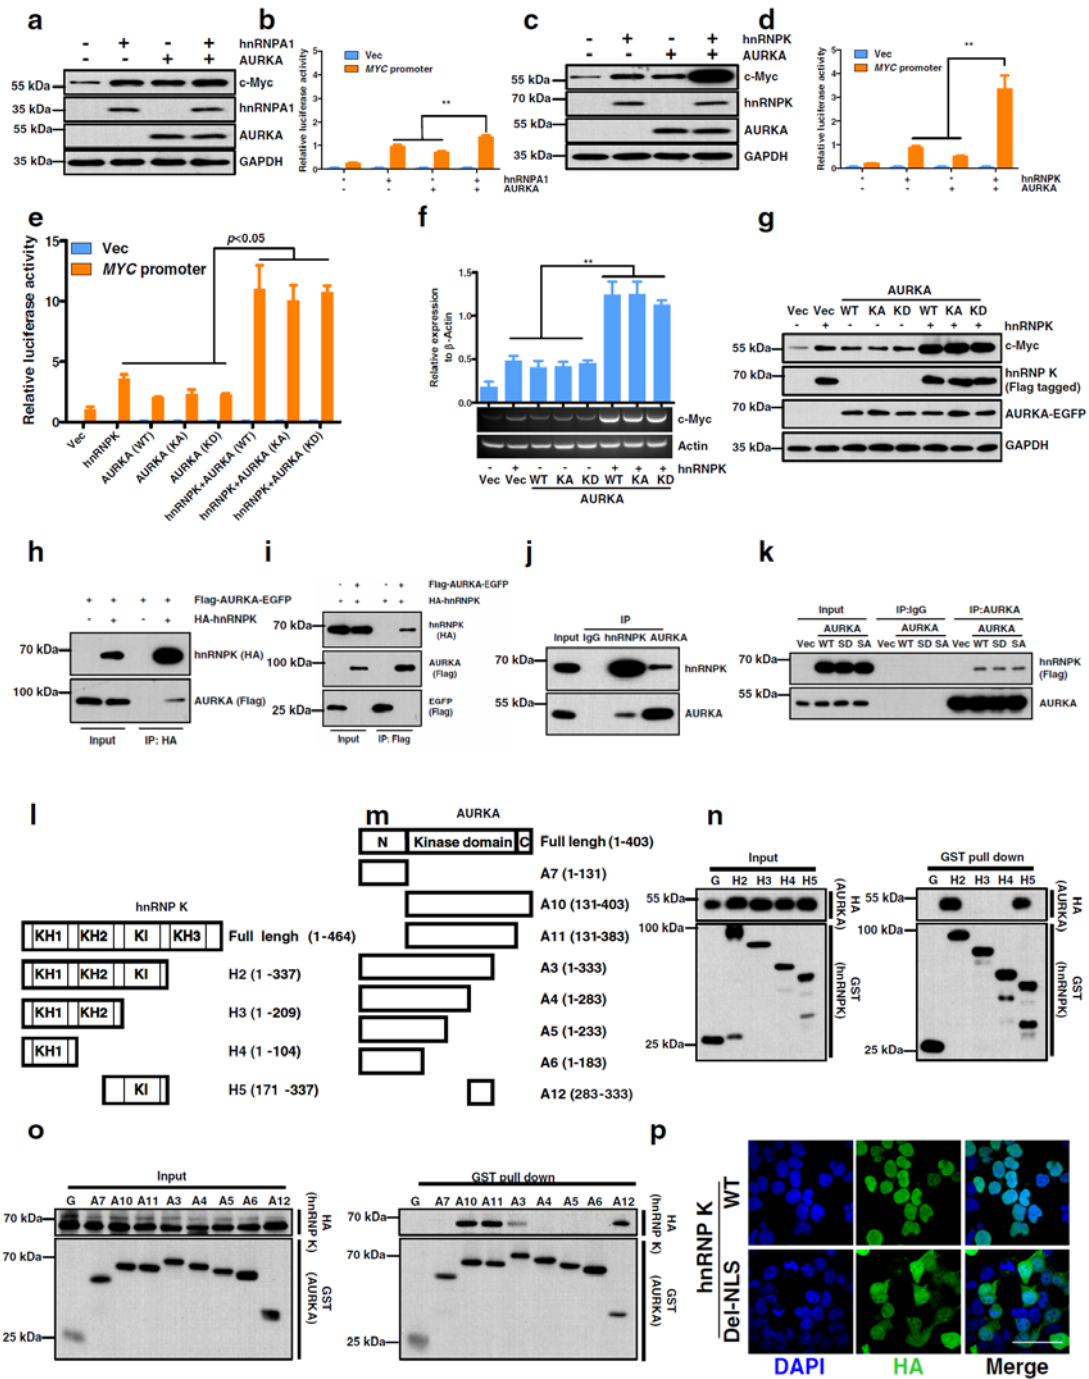

Supplementary Fig. 3 Related to Fig. 3

(a) and (b) MDA-MB-231 cells ( $5 \times 10^5$ ) were co-transfected with 1  $\mu$ g of AURKA and/or hnRNP A1 and 0.5  $\mu$ g of MYC promoter reporter (MYC) or basic reporter (Vec) along with 0.05  $\mu$ g of pRL-TK plasmid for 24 h. The expression of c-Myc, hnRNP A1,

AURKA and GAPDH were confirmed via IB (a). The *MYC* promoter activity was determined via a dual luciferase reporter assay (b). The bars represented the means  $\pm$  SEM of three independent experiments (ANOVA followed by the LSD test, \*\*:  $p \leq 0.01$ ).

**(c) and (d)** MDA-MB-231 cells ( $5 \times 10^5$ ) were co-transfected with 1  $\mu\text{g}$  of AURKA and/or hnRNP K and 0.5  $\mu\text{g}$  of *MYC* promoter reporter (MYC) or basic reporter (Vec) along with 0.05  $\mu\text{g}$  of pRL-TK plasmid for 24 h. The expression of c-Myc, hnRNP K, AURKA and GAPDH were determined via IB (c). The *MYC* promoter activity was determined via a dual luciferase reporter assay (d). The bars represented the means  $\pm$  SEM of three independent experiments (ANOVA followed by the LSD test, \*\*:  $p \leq 0.01$ ).

**(e), (f) and (g)** MDA-MB-231 cells ( $5 \times 10^5$ ) were co-transfected with 1  $\mu\text{g}$  of expression vectors for the AURKA mutants and hnRNP K and 0.5  $\mu\text{g}$  of *MYC* promoter reporter (MYC) or basic reporter (Vec) along with 0.05  $\mu\text{g}$  of pRL-TK plasmid for 24 h. *MYC* promoter activity was determined via a dual luciferase reporter assay (e). The expression of c-Myc, hnRNP K, AURKA and GAPDH were analyzed via RT-PCR (f) and IB (g). The bars represented the means  $\pm$  SEM of three independent experiments (ANOVA followed by the LSD test, \*\*:  $p \leq 0.01$ , \*\*\*:  $p \leq 0.001$ ).

**(h)** 293T cells ( $3 \times 10^6$ ) were co-transfected with 20  $\mu\text{g}$  of Flag-AURKA-EGFP and hnRNP K-HA for 24 h. The cells were lysed and IP was performed using a anti-HA antibody. The expression of Flag-tagged AURKA and HA-tagged hnRNP K was

determined via IB.

**(i)** 293T cells ( $3 \times 10^6$ ) were co-transfected with 20  $\mu\text{g}$  of HA-hnRNP K and Flag-AURKA-EGFP for 24 h. The cells were lysed and IP was performed using an anti-Flag antibody. The expression of Flag-tagged AURKA and HA-tagged hnRNP K was determined via IB.

**(j)** MDA-MB-231 cells ( $6 \times 10^6$ ) in the exponential growth phase were lysed, and IP was performed using antibodies against hnRNP K, AURKA or control IgG. The expression of AURKA and hnRNP K was determined via IB.

**(k)** Twenty  $\mu\text{g}$  of Flag-tagged hnRNP K (WT, SD or SA) expression plasmids were transfected into  $3 \times 10^6$  293T cells. After 24 h, the cells were lysed and IP was performed using an anti-AURKA antibody. The expression of Flag-tagged hnRNP K and AURKA were determined by IB.

**(l)** Schematic diagram of the GST-fused hnRNP K truncated mutants.

**(m)** Schematic diagram of the GST-fused AURKA truncated mutants.

**(n)** Twenty  $\mu\text{g}$  of HA-tagged AURKA was overexpressed in  $3 \times 10^6$  293T cells for 24 h. The cells were lysed and divided equally into 5 aliquots. 5  $\mu\text{g}$  of GST-fused hnRNP K was incubated with lysates, followed by pull down of GST-fused hnRNP K to examine the expression of HA-tagged AURKA in GST-fused hnRNP K protein complexes via IB.

**(o)** Twenty  $\mu\text{g}$  of HA-tagged hnRNP K was overexpressed in  $3 \times 10^6$  293T cells for 24 h. The cells were lysed and divided equally into 9 aliquots. 5  $\mu\text{g}$  of GST-fused AURKA was incubated with lysates, followed by pull down of GST-fused AURKA to

examine the expression of HA-tagged hnRNP K in GST-fused AURKA protein complexes via IB.

**(p)** 293T cells ( $5 \times 10^5$ ) were transfected with 1  $\mu\text{g}$  of wild type or NLS deleted hnRNP K for 24 h. Cells were fixed and subjected to IF staining.

Supplementary Fig. 4

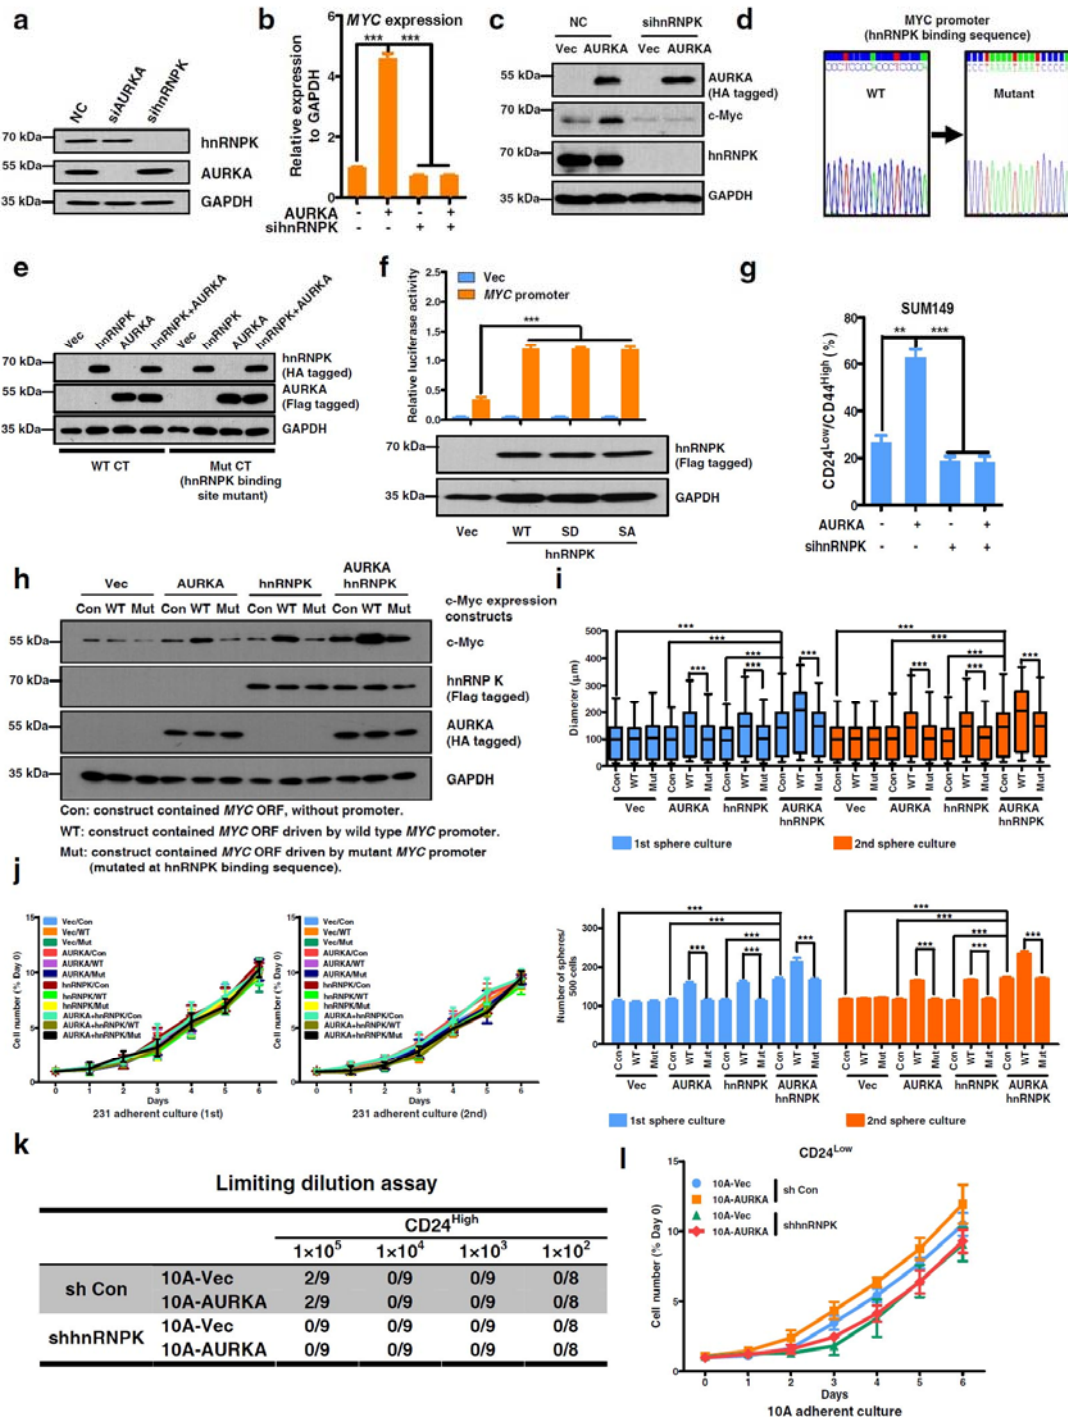

Supplementary Fig. 4 Related to Fig. 4

(a) MDA-MB-231 cells ( $3 \times 10^6$ ) were transfected with 400 pmol siRNA against negative control (NC), AURKA and hnRNP K for 48 h. The cells were subjected to IB analysis.

**(b) and (c)** Cells were treated as Fig. 4c and Then subjected to real time PCR (b) and IB (c) analysis.

**(d)** The sequencing results of the CT-element mutation of the *MYC* promoter are shown.

**(e)** The treatment was identical to that in Fig. 4d. The cells were collected for performing IB analysis.

**(f)** One  $\mu\text{g}$  of Flag-tagged hnRNP K (WT, SD or SA) expression plasmids, 0.5  $\mu\text{g}$  of *MYC* promoter reporter or a basic reporter and 0.05  $\mu\text{g}$  of pRL-TK plasmid were transfected into  $5 \times 10^5$  293T cells. After 24 h, dual luciferase reporter assays were performed to evaluate *MYC* promoter activation. The bars represented the means  $\pm$  SEM of three independent experiments (ANOVA followed by the LSD test, \*\*\*:  $p \leq 0.001$ ).

**(g)** SUM149 cells ( $5 \times 10^5$ ) overexpressing HA-tagged AURKA were transfected with 60 pmol hnRNP K or NC siRNA. After 48 h, the CD24<sup>low</sup>/CD44<sup>high</sup> population was analyzed via flow cytometry. The bars represented the means  $\pm$  SEM of three independent experiments (ANOVA followed by the LSD test, \*\*:  $p \leq 0.01$ , \*\*\*:  $p \leq 0.001$ ).

**(h)** Expression of exogenous c-Myc was driven by wild-type ("WT") or mutant (mutated hnRNP K binding site, "Mut") *MYC* promoter in MDA-MB-231. Control ("Con") represented wild-type *MYC* promoter without the downstream *MYC* open reading frame. AURKA or/and hnRNP K were expressed via lentivirus-mediated gene transfer. The cells were also subjected to IB analysis.

**(i)** The cells established in (h) were subjected to mammosphere culture (6 days) and the secondary passaging (additional 6 days). The left panel showed the distribution pattern of mammosphere size from MDA-MB-231 (Kruskal-Wallis test followed by Dunn's Multiple Comparison test, \*\*\* $p < 0.001$ ). The right panel showed the number of mammosphere ( $\Phi > 60 \mu\text{m}$ ).

**(j)** The cells used in (i) to perform two round mammosphere culture were subjected to a proliferation assay by cell counting.

**(k)** The treatment was the same as Fig. 4l. The population of CD24<sup>High</sup> were used to perform limiting dilution assays in NOD/SCID mice.

**(l)** The CD24<sup>Low</sup> cells sorted in Fig. 4l were subjected to evaluate proliferation by cell counting.

Supplementary Fig. 5

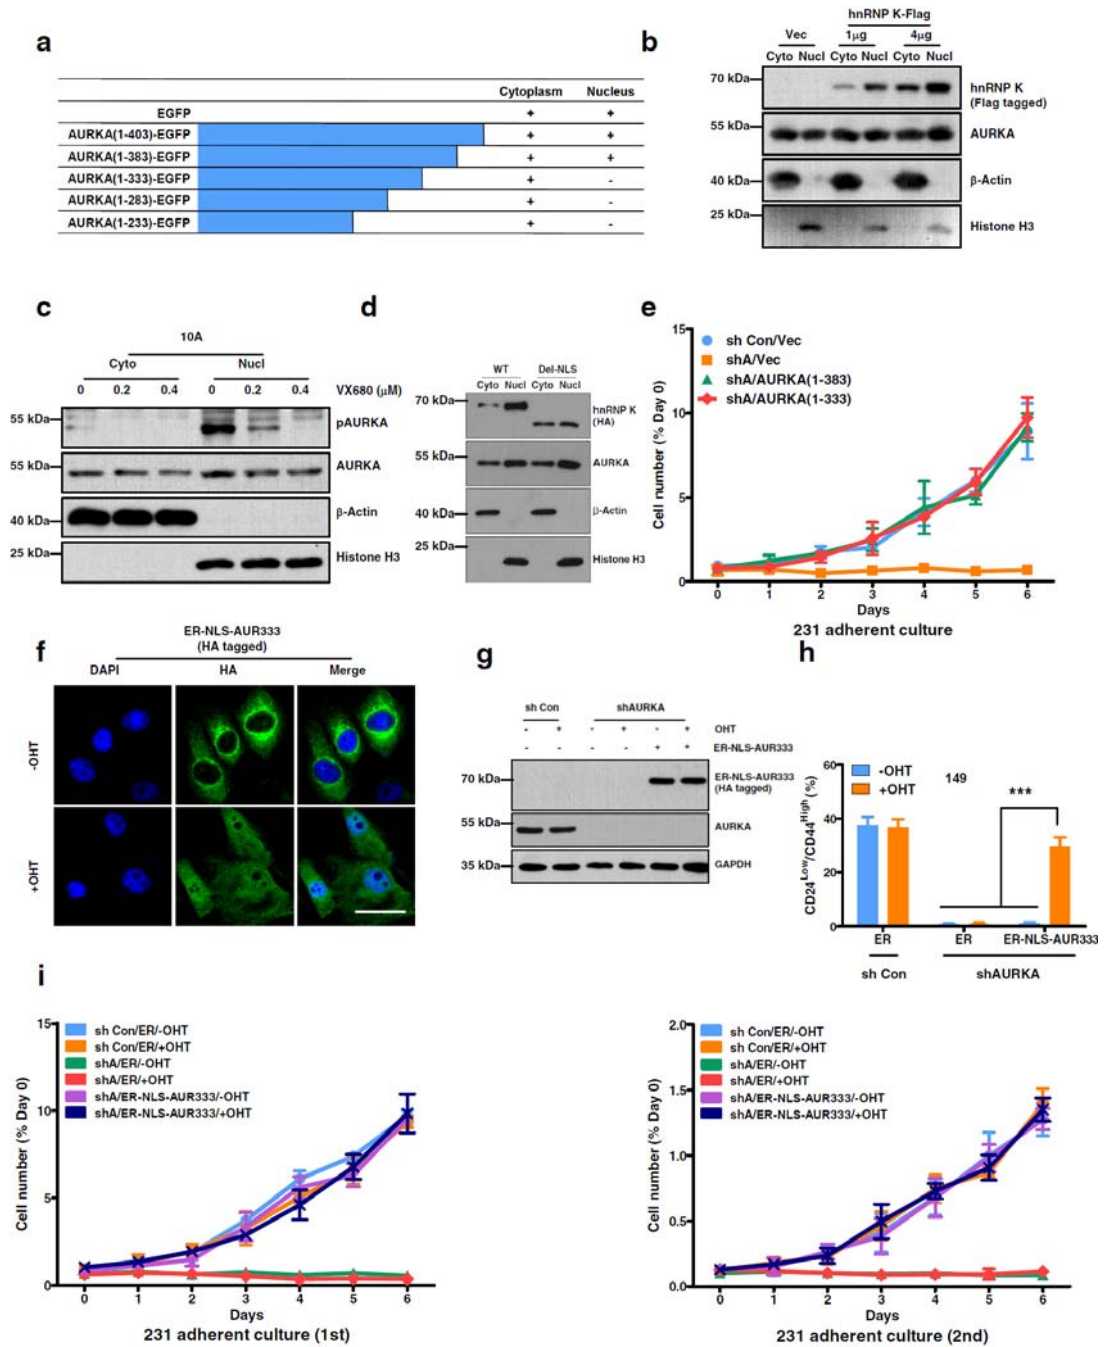

Supplementary Fig. 5 Related to Fig. 5

(a) The results of Fig. 5a were summarized.

(b) Different amounts of hnRNP K (0  $\mu\text{g}$ , 1  $\mu\text{g}$  or 4  $\mu\text{g}$ ) were expressed in  $5 \times 10^5$  MDA-MB-231 cells for 24 h. The cytoplasmic and nuclear proteins were extracted and subjected to IB analysis.



**(c)** MCF-10A cells ( $6 \times 10^6$ ) were treated with the indicated concentrations of VX-680 for 24 h. The cytoplasmic and nuclear proteins were extracted and subjected to IB analysis.

**(d)** Twenty  $\mu\text{g}$  of wild type or NLS deletion mutant of hnRNP K were expressed in  $3 \times 10^6$  MDA-MB-231 cells for 24 h. The cytoplasmic and nuclear proteins were extracted and subjected to IB analysis.

**(e)** The cells in Fig. 5e were subjected to evaluate proliferation in adherent culture by cell counting.

**(f)** MDA-MB-231 cells were infected with lentivirus expressing a fusion protein (ER-NLS-AUR333) and were treated with or without 200nM OHT for 48 h. The cells were fixed and IF staining was performed against the HA-tag. Scale bar, 50  $\mu\text{m}$ .

**(g)** MDA-MB-231 cells were co-infected with lentivirus expressing AURKA shRNA (shAURKA or sh Control) and ER-NLS-AUR333. Then the cells were replaced with fresh medium and cultured for 48 h in the presence or absence of 200nM OHT treatment. The cells were selected in medium containing or lacking OHT in the presence of 1  $\mu\text{g}/\text{ml}$  puromycin and 5  $\mu\text{g}/\text{ml}$  blasticidin for 48 h. The expression levels of AURKA (endogenous), ER-NLS-AUR333 and GAPDH were determined via IB.

**(h)** SUM149 cells were co-infected with lentivirus expressing AURKA shRNA (shAURKA or sh Control) and ER-NLS-AUR333. Then, the cells were cultured in fresh medium for 48 h in the presence or absence of 200nM OHT. The cells were selected for in medium containing or lacking OHT and in the presence of 1  $\mu\text{g}/\text{ml}$

puromycin and 5 µg/ml blasticidin for 48 h, before harvested for CD24<sup>low</sup>/CD44<sup>high</sup> population analysis by flow cytometry. The bars represented the means ± SEM of three independent experiments (ANOVA followed by the LSD test, \*\*\*:  $p \leq 0.001$ ).

**(i)** The cells used in Fig.5g to perform two rounds of mammosphere cultures were subjected to evaluate proliferation in adherent culture by cell counting.

Supplementary Fig. 6

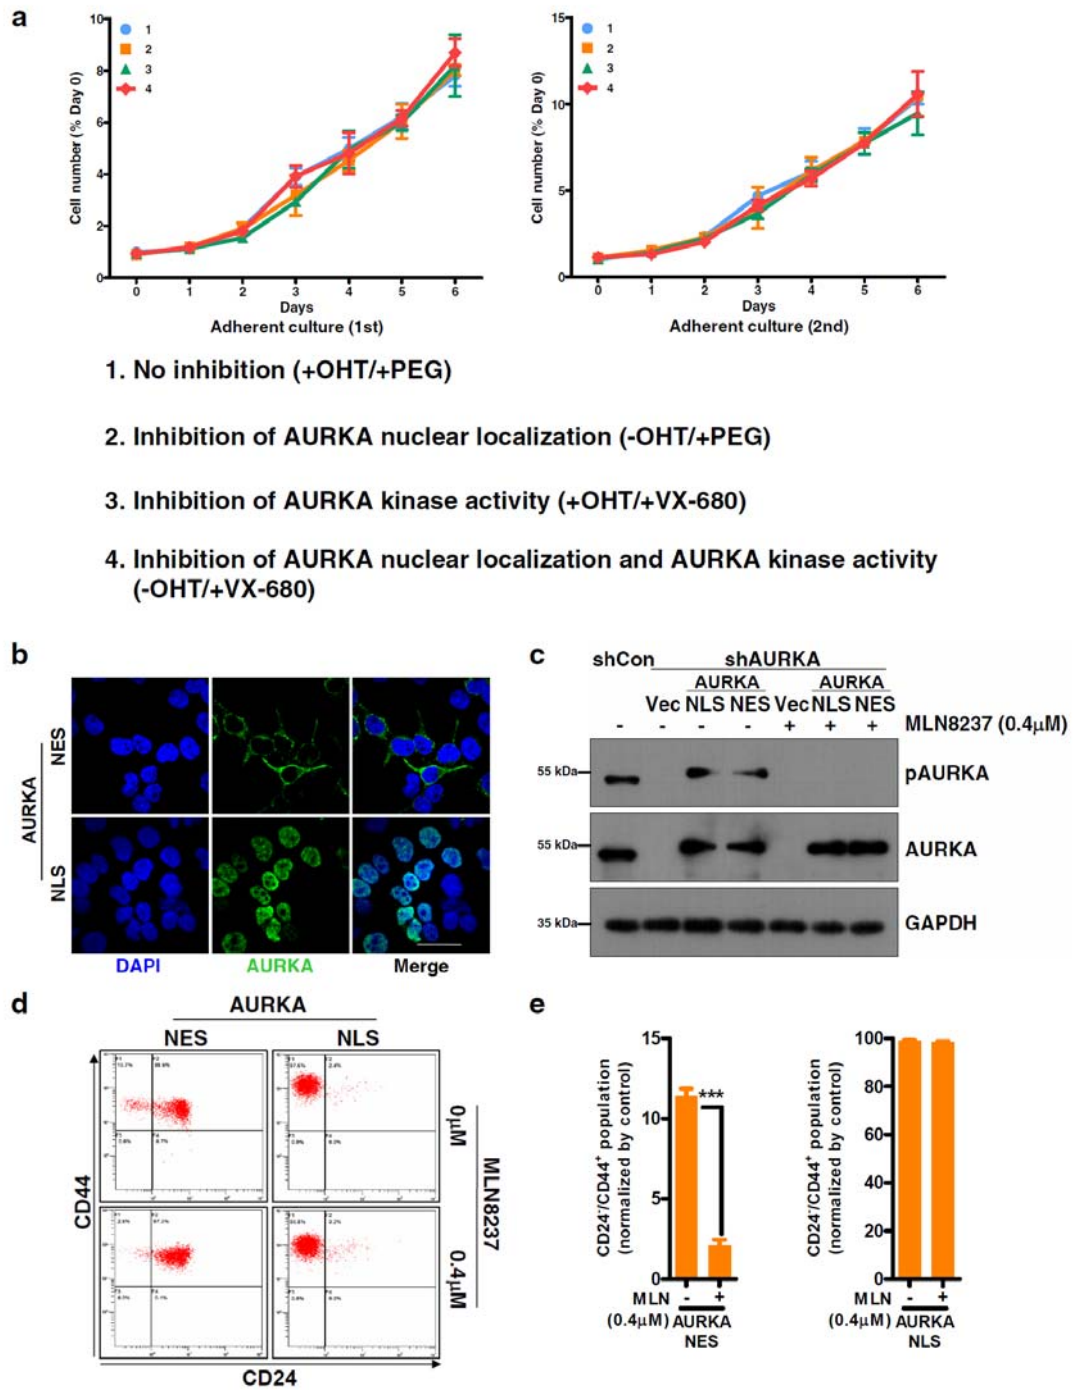

Supplementary Fig. 6 Related to Fig. 6

(a) The cells used in Fig. 6f to perform two rounds mammosphere cultures were assayed for proliferation in adherent culture by cell counting.

(b)-(e) MDA-MB-231 cells were infected with lentivirus expressed AURKA shRNA

for 24 h. Then, the lentivirus infected MDA-MB-231 cells ( $5 \times 10^5$ ) were transfected with 1  $\mu\text{g}$  of the NES or NLS fused AURKA for 24 h. Then, cells were propagated, and were treated with or without 0.4  $\mu\text{M}$  MLN8237 or vehicle for 48 h. The cells were collected for IF staining (b), IB (c) and CD24/CD44 staining (d) analysis. The results in (d) are summarized in (e).

Supplementary Fig. 7

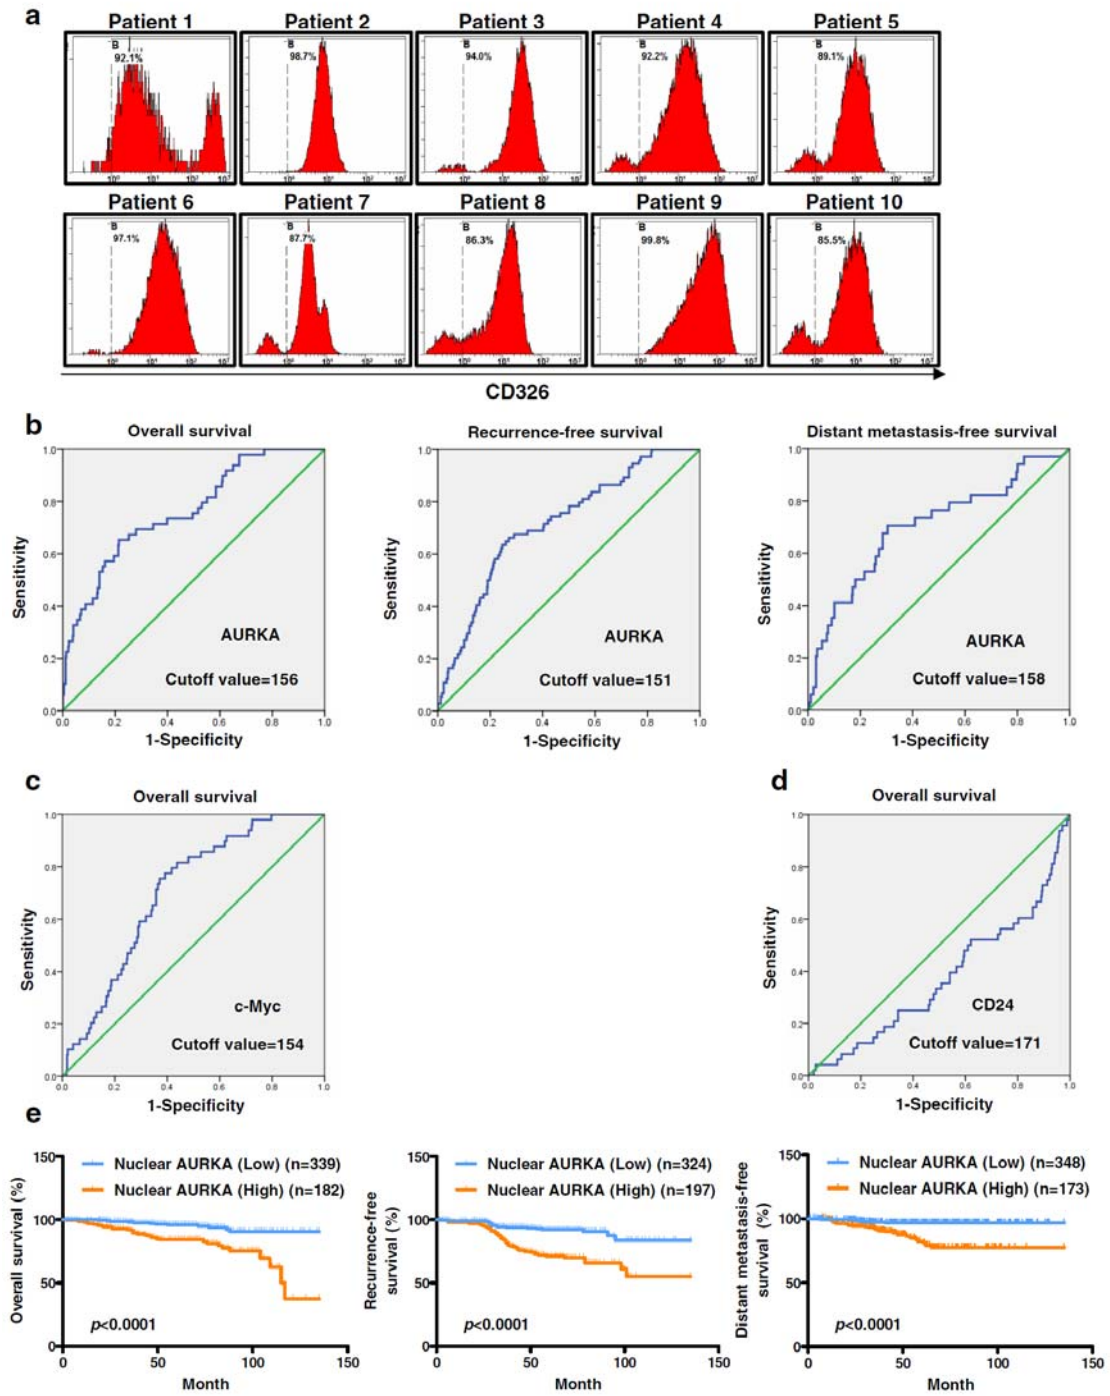

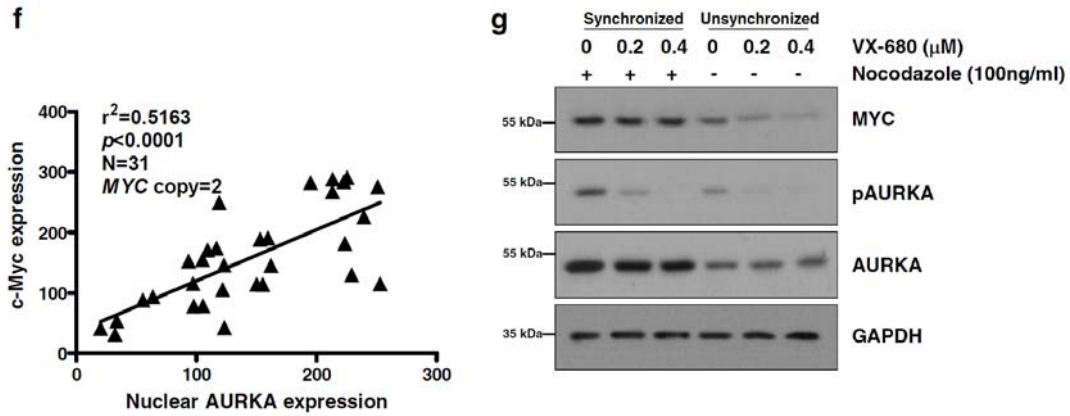

**Supplementary Fig. 7 Related to Fig. 7**

(a) The primary breast cancer cells shown in Fig. 7a were analyzed for the expression of CD326 via flow cytometry.

(b)-(d) IHC staining of AURKA, c-Myc and CD24, respectively, were performed on the breast cancer tissues. The cutoff values were determined based on the receiver operating characteristic (ROC) curve.

(e) IHC staining of AURKA was performed on the breast cancer tissues.. Kaplan-Meier analysis was performed and the log-rank test was used for statistical analysis.

(f) Breast cancer samples (N=59) were subjected to FISH assay to identify their *MYC* copy number. Samples were also subjected to IHC staining of AURKA and c-Myc. The samples (N=31) with normal *MYC* copy number (2 copies) and with paired AURKA and c-Myc staining were scored and subjected to linear regression analysis.

(g) MDA-MB-231 cells were synchronized at M phase by treating with 100 ng/ml nocodazole for 12 h. M phase cells were collected. The M phase cells were treated with 100 ng/ml nocodazole and indicated concentration of VX-680 for 36 h. The control cells (unsynchronized cells) were treated with indicated concentration of

VX-680 for 36 h. Cells were subjected to IB analysis.

Supplementary Fig. 8

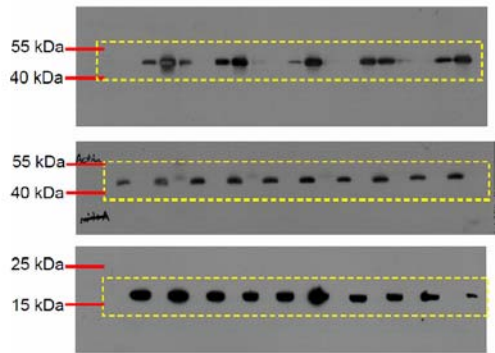

Full unedited gel for Figure 1a

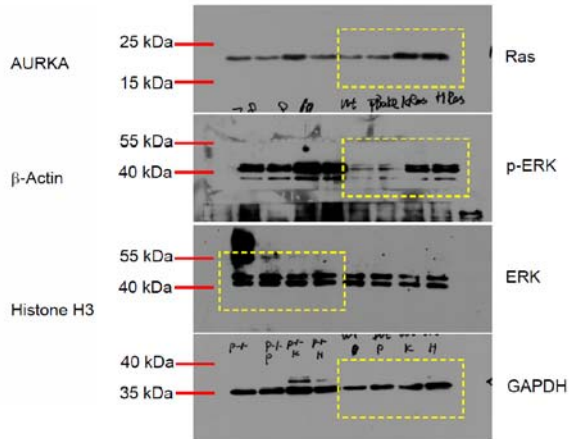

Full unedited gel for Figure 1c left panel

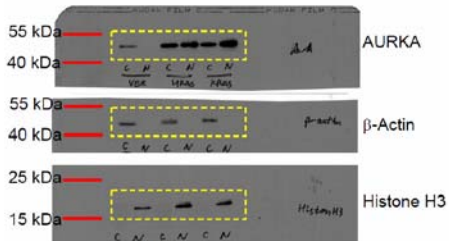

Full unedited gel for Figure 1c right panel

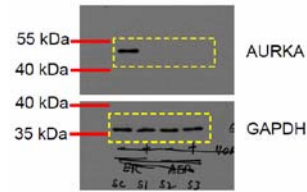

Full unedited gel for Figure 1d left panel

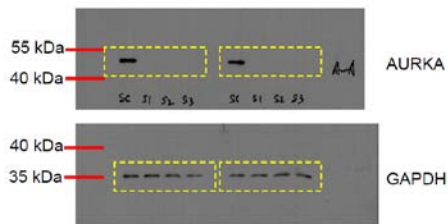

Full unedited gel for Figure 1d left panel

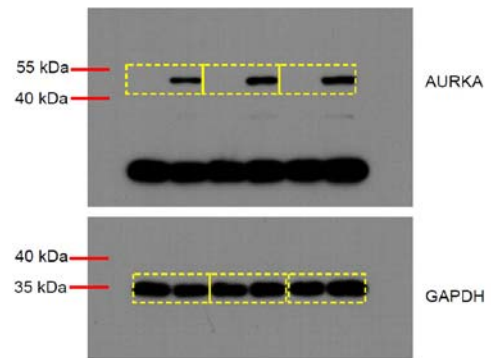

Full unedited gel for Figure 1e left panel



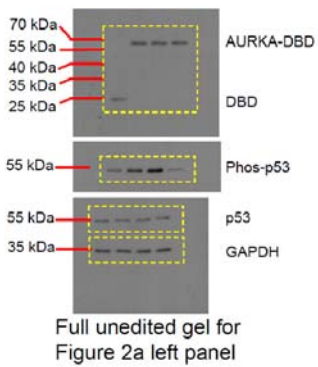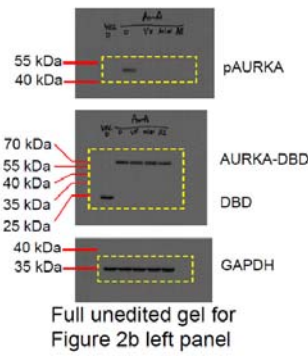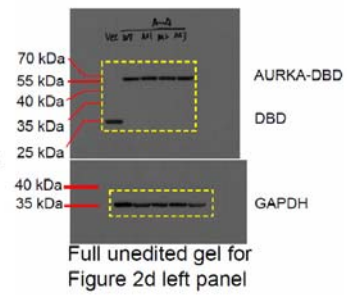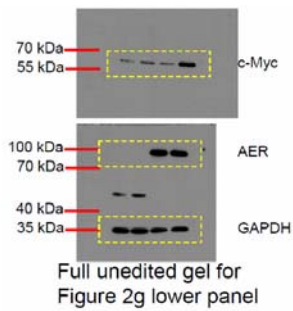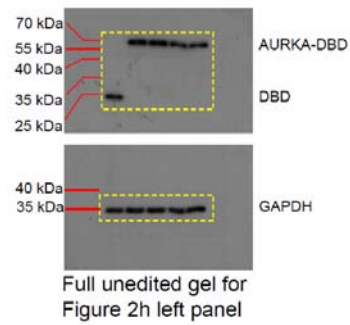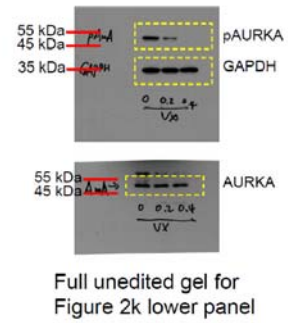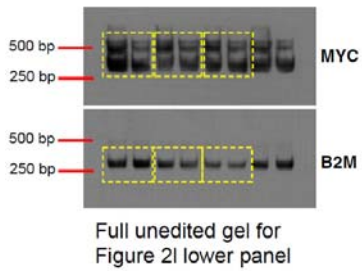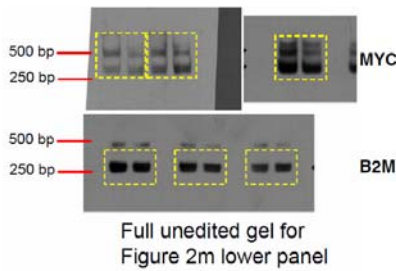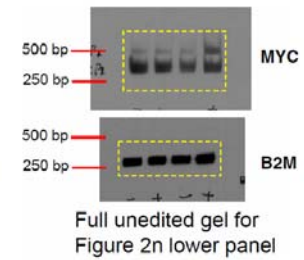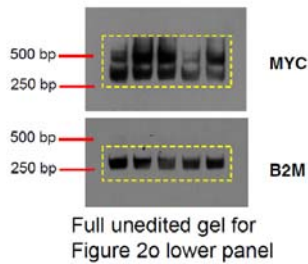

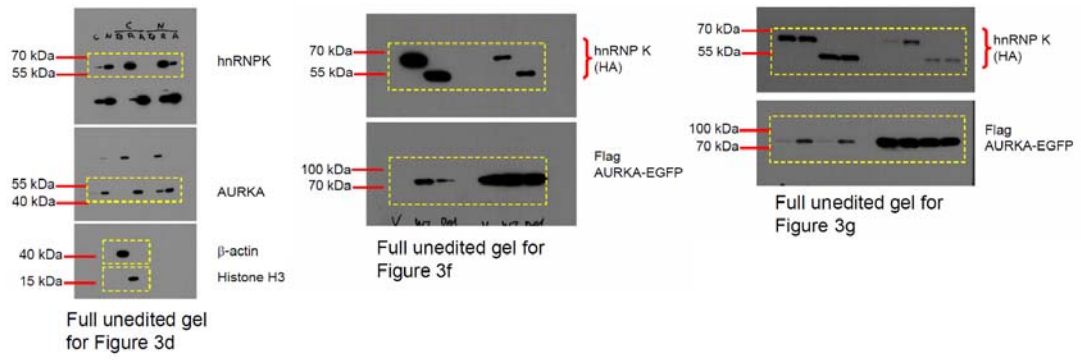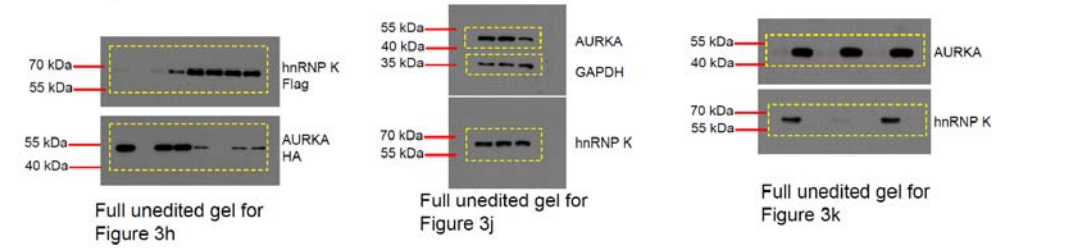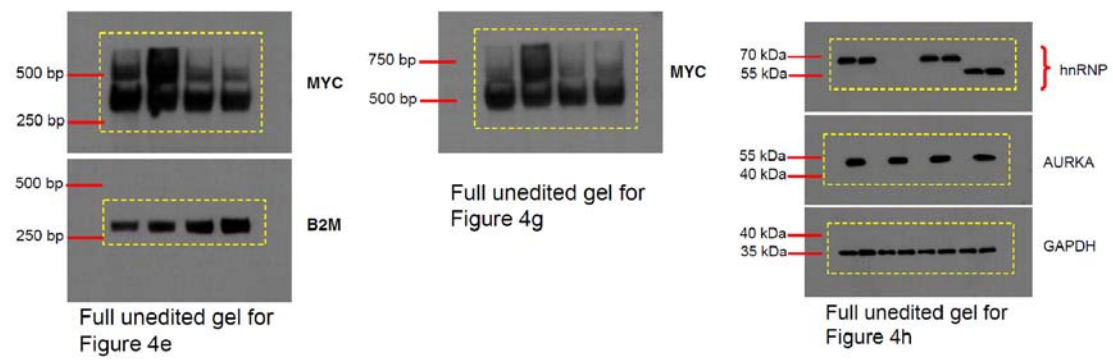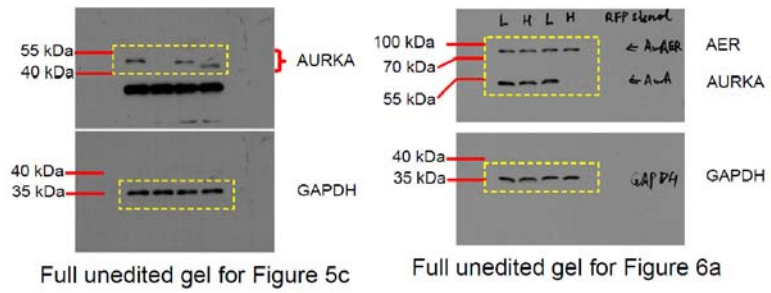

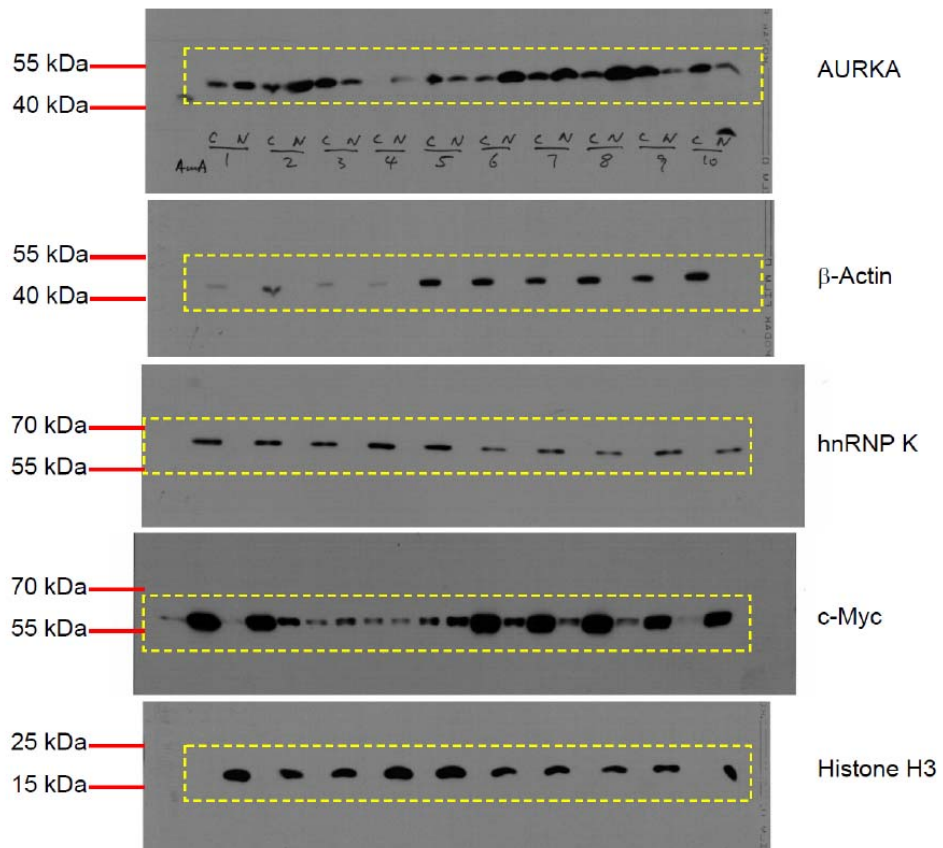

Full unedited gel for Figure 7A

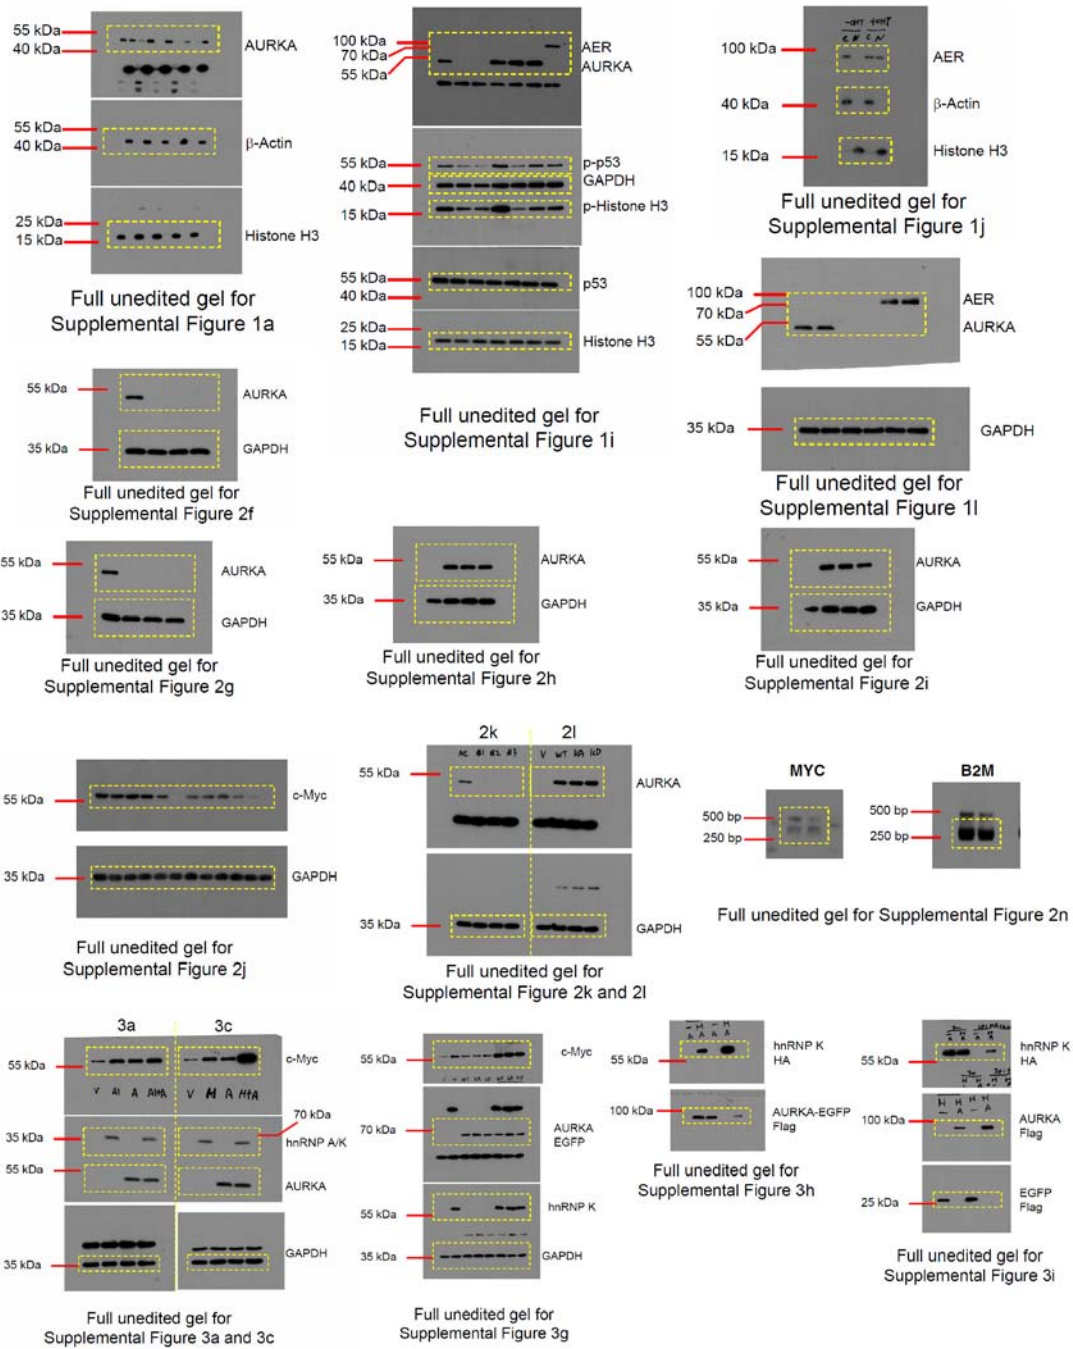



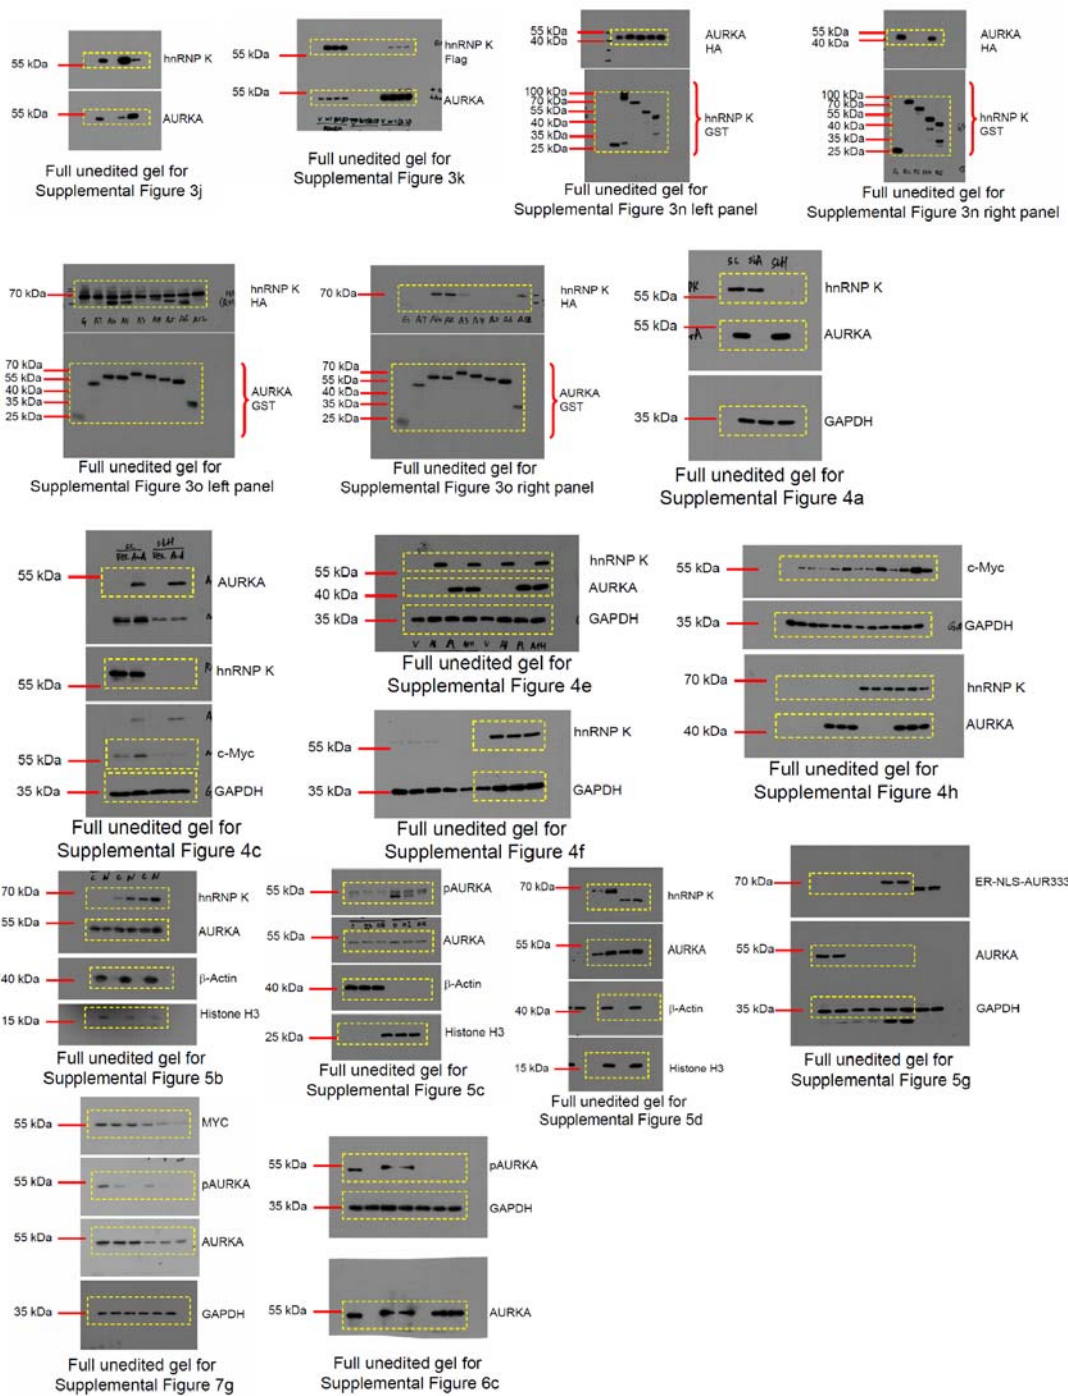

**Supplementary Fig. 7 Uncropped images of blots.** Uncropped scans of blots shown in the Figs 1a, 1c, 1d, 1e, 2a, 2b, 2d, 2g, 2h, 2k, 2l, 2m, 2n, 2o, 3d, 3f, 3g, 3h, 3j, 3k, 4e, 4g, 4h, 5c, 6a, 7a, and supplementary Figs. 1a, 1i, 1j, 1l, 2f, 2g, 2h, 2i, 2j, 2k, 2l, 2n, 3a, 3c, 3g, 3h, 3i, 3j, 3k, 3n, 3o, 4a, 4c, 4e, 4f, 4h, 5b, 5c, 5d, 5g, 6c, 7g.

## Supplementary Table 1

Differentially expressed genes regulated by AURKA are identified by RNA sequencing.

| Symbol    | log2 Ratio<br>(10A-A2/10A-P2) | Symbol     | log2 Ratio<br>(10A-A2/10A-P2) | Symbol   | log2 Ratio<br>(10A-A2/10A-P2) |
|-----------|-------------------------------|------------|-------------------------------|----------|-------------------------------|
| SIRT2     | 10.509775                     | KLF10      | 1.15444818                    | SLC1A4   | -1.919557007                  |
| SCNN1G    | 10.39874369                   | ZNF598     | 1.153753546                   | FAM84A   | -1.913179241                  |
| FAM65B    | 9.884170519                   | GADD45GIP1 | 1.152879931                   | PDZK1IP1 | -1.903284144                  |
| SLCO4A1   | 9.214319121                   | SUV39H1    | 1.152547591                   | CLMN     | -1.878543708                  |
| IKZF2     | 8.924812504                   | GTPBP4     | 1.152469772                   | GAS1     | -1.870432736                  |
| LENG9     | 8.45532722                    | FDX1       | 1.152105919                   | PVRL4    | -1.866431799                  |
| SAMSN1    | 5.442943496                   | THOP1      | 1.148478372                   | CA2      | -1.866431799                  |
| DUSP1     | 4.423694361                   | NOC4L      | 1.147539503                   | CCDC80   | -1.866078972                  |
| NUDT11    | 3.807354922                   | RAD18      | 1.147050535                   | SPARC    | -1.857404329                  |
| GDA       | 3.693228803                   | PITPNC1    | 1.145796731                   | DOPEY1   | -1.85705944                   |
| MAOA      | 3.475433213                   | DEPDC1     | 1.136863606                   | KLRC2    | -1.842398277                  |
| KLF9      | 3.169925001                   | BTF3L4     | 1.135458848                   | PGBD5    | -1.840059087                  |
| PRSS3     | 3.058893689                   | RPUSD2     | 1.135340765                   | TP53INP1 | -1.831952286                  |
| FOS       | 3.030742649                   | YDJC       | 1.135079534                   | GPR110   | -1.824599868                  |
| TSPAN18   | 2.925999419                   | UBE2E2     | 1.1318415                     | IFFO2    | -1.82196018                   |
| DSEL      | 2.807354922                   | DNAJC11    | 1.12988766                    | MTUS1    | -1.806336789                  |
| ASNS      | 2.800919097                   | MRPL4      | 1.128153797                   | KRT80    | -1.806313641                  |
| FKBP5     | 2.607932354                   | RABEPK     | 1.127348565                   | SLC16A2  | -1.800710721                  |
| SLC19A1   | 2.584962501                   | DUSP4      | 1.124057417                   | ANKRD37  | -1.790225486                  |
| OSBPL6    | 2.560714954                   | DDX56      | 1.123254568                   | LY6D     | -1.783409226                  |
| E2F1      | 2.544320516                   | PRPS2      | 1.121007204                   | DSG3     | -1.780000039                  |
| SPRY4     | 2.475733431                   | ZNF593     | 1.117482766                   | CDH1     | -1.770295763                  |
| CCL20     | 2.432464571                   | ABLIM3     | 1.114205362                   | TUFT1    | -1.760966908                  |
| POLR3G    | 2.280107919                   | ATAD3A     | 1.113956189                   | HEPHE1   | -1.754725279                  |
| HSD17B2   | 2.243389219                   | MCM5       | 1.113585596                   | C1orf133 | -1.745489666                  |
| CDCA5     | 2.230297619                   | C3orf75    | 1.112814872                   | ALDH3A1  | -1.731874311                  |
| TFCP2L1   | 2.212449618                   | KIF2C      | 1.111076327                   | BNIP3L   | -1.729900402                  |
| FOSL1     | 2.20511443                    | BOP1       | 1.110602199                   | SELENBP1 | -1.728504015                  |
| MYO19     | 2.169925001                   | IFRD2      | 1.110107067                   | FGD6     | -1.719644684                  |
| MRPS30    | 2.137503524                   | MT1F       | 1.105673107                   | F2R      | -1.718937602                  |
| MLPH      | 2.134598267                   | CDK4       | 1.104894068                   | C1orf116 | -1.716480383                  |
| CSNK2A1   | 2.111852974                   | EHD4       | 1.10426243                    | NOTCH1   | -1.712149274                  |
| C13orf15  | 2.10433666                    | CCDC90A    | 1.102781686                   | TMEM184A | -1.706728364                  |
| LYAR      | 2.101879614                   | TRIP13     | 1.0990326                     | SLC29A3  | -1.699068986                  |
| LPIN2     | 2.099535674                   | RPIA       | 1.096316777                   | CELSR2   | -1.695101763                  |
| GCNT1     | 2.078002512                   | NUF2       | 1.095588045                   | TNFRSF21 | -1.694673872                  |
| MCM10     | 2.064130337                   | RNF26      | 1.09511867                    | PLSCR4   | -1.692925033                  |
| COPS8     | 2.062520738                   | AOX1       | 1.094683119                   | BDNF     | -1.67723677                   |
| EIF4EBP1  | 2.057191107                   | UBE2T      | 1.091832283                   | SSBP3    | -1.673311593                  |
| HES7      | 2.044394119                   | EFNB2      | 1.091764607                   | TP63     | -1.671983443                  |
| PASK      | 2.044394119                   | SMAGP      | 1.0912826                     | SMPD1    | -1.671377253                  |
| AKAP12    | 2.019899557                   | PPAT       | 1.089870231                   | USP16    | -1.671377253                  |
| ITGA10    | 2.017073513                   | PLXNA2     | 1.086591678                   | AHNAK2   | -1.671294889                  |
| SLC7A2    | 2                             | SIAH2      | 1.082773052                   | C7orf60  | -1.670134086                  |
| VSTM2L    | 1.9727516                     | SLC6A15    | 1.081708677                   | FHL2     | -1.662846179                  |
| LOC728192 | 1.963474124                   | KPNA2      | 1.081252874                   | SLC16A4  | -1.661839666                  |
| MARS      | 1.956298691                   | ACOT7      | 1.081079606                   | IPW      | -1.66175925                   |
| VARS2     | 1.938599455                   | H2AFX      | 1.080956922                   | PDK1     | -1.650861795                  |
| ANXA6     | 1.925999419                   | POLR1B     | 1.07948753                    | FAT2     | -1.642225501                  |
| CDA       | 1.906890596                   | SNAI2      | 1.076049422                   | VWA5A    | -1.617666666                  |
| MRPL52    | 1.835047752                   | GNG4       | 1.073520517                   | USP8     | -1.616551191                  |
| MIER2     | 1.823122238                   | PDCD2L     | 1.073239855                   | PCMTD1   | -1.607933023                  |
| AURKB     | 1.813948227                   | GFM1       | 1.072362706                   | NR1D2    | -1.599488349                  |
| DUSP23    | 1.803921047                   | ARL6IP4    | 1.070192056                   | LIMCH1   | -1.598810707                  |

|              |             |          |             |            |              |
|--------------|-------------|----------|-------------|------------|--------------|
| CAD          | 1.792575704 | GPS1     | 1.069177488 | GLIPR1     | -1.593005421 |
| MED8         | 1.791998161 | TMX2     | 1.067022477 | RELB       | -1.584024772 |
| DNER         | 1.79130774  | EIF3B    | 1.066848619 | C5orf13    | -1.584024772 |
| CENPK        | 1.789647202 | ANGPTL4  | 1.066327358 | PDE7A      | -1.583774608 |
| SLC25A10     | 1.788495895 | NOP2     | 1.06284899  | NTF4       | -1.583689722 |
| SLC25A15     | 1.788495895 | POLR2E   | 1.062494761 | MMP2       | -1.569449501 |
| MFSD2A       | 1.786596362 | HCFC1    | 1.0620059   | PTPRK      | -1.562679196 |
| PIK3R1       | 1.785677009 | OAF      | 1.061954469 | MAPK8IP3   | -1.55532429  |
| RCC1         | 1.772653133 | NDUFAF2  | 1.061035995 | BTG1       | -1.551141897 |
| PER1         | 1.747904162 | NUDC     | 1.060304902 | ADAM8      | -1.548893246 |
| PHLDA2       | 1.746530805 | PPM1G    | 1.059734955 | VSNL1      | -1.547539873 |
| MYBL2        | 1.745098733 | NLE1     | 1.059472879 | CHD2       | -1.547522948 |
| SMPD2        | 1.72935241  | C8orf55  | 1.057600546 | NCOA7      | -1.543881273 |
| LY6K         | 1.721144605 | ALG3     | 1.055943489 | FZD6       | -1.536468894 |
| CADM3        | 1.707819249 | FAM166A  | 1.055921236 | SLC27A1    | -1.536468894 |
| PSAT1        | 1.706494969 | ECE2     | 1.055818516 | SOX9       | -1.529143985 |
| FKBP4        | 1.678889627 | SNRPD1   | 1.05548347  | NR2F2      | -1.526156118 |
| SFXN4        | 1.678071905 | TMEM194A | 1.050711843 | EPHB3      | -1.522787355 |
| HIPK2        | 1.670288099 | C21orf70 | 1.048822479 | ARID4B     | -1.51699991  |
| QRFPR        | 1.662965013 | CCND3    | 1.048781214 | SOX4       | -1.51578111  |
| ZFP36        | 1.652076697 | IRX3     | 1.048739343 | JUP        | -1.50420415  |
| CDC45        | 1.648699591 | NSMCE4A  | 1.04655347  | SULF2      | -1.501125791 |
| PSCA         | 1.64385619  | DDIT4    | 1.045910352 | IFI6       | -1.498267173 |
| LOC100128881 | 1.64385619  | TMTC1    | 1.045525201 | ALDH3B1    | -1.497304838 |
| FOXO1        | 1.64368494  | EXOSC4   | 1.045465931 | YPEL3      | -1.466860715 |
| KATNB1       | 1.640457613 | TOMM40   | 1.044999133 | POFUT2     | -1.465988687 |
| RPUSD3       | 1.637429921 | MGLL     | 1.044824401 | KCTD11     | -1.464742017 |
| MAFB         | 1.637016837 | IARS     | 1.044322094 | RAB7B      | -1.458106221 |
| NCAPH        | 1.634960984 | HNRNPAB  | 1.043805864 | IRF6       | -1.454471422 |
| MYC          | 1.6316708   | TBL3     | 1.041571692 | S100A8     | -1.453172829 |
| SRM          | 1.623418035 | GINS2    | 1.0407821   | P4HTM      | -1.448554625 |
| MLKL         | 1.619596136 | EXO1     | 1.040036746 | C16orf7    | -1.44656815  |
| PID1         | 1.609926685 | SIGMAR1  | 1.038624897 | EEA1       | -1.436848333 |
| PRC1         | 1.585791398 | CSK      | 1.03754538  | PLCD3      | -1.391044644 |
| CHORDC1      | 1.577984181 | EREG     | 1.036432296 | SIRPA      | -1.387061927 |
| LONP1        | 1.572527541 | MRPL12   | 1.032482311 | DLG1       | -1.383526527 |
| RAC3         | 1.559685526 | DTYMK    | 1.029879368 | TBC1D23    | -1.377278023 |
| MAK16        | 1.558976297 | CDC6     | 1.02937626  | JUND       | -1.374886144 |
| BYSL         | 1.558976297 | ATRIP    | 1.029114262 | RBMS3      | -1.368371727 |
| STK39        | 1.552541023 | ID1      | 1.02831904  | GPCPD1     | -1.367584983 |
| MT2A         | 1.549454062 | RNF126   | 1.022285545 | ALCAM      | -1.354349573 |
| AREG         | 1.545991999 | HPCAL1   | 1.021032372 | FAM46A     | -1.341639422 |
| NUP93        | 1.544216945 | NOP56    | 1.020228404 | BAG1       | -1.340401127 |
| TRMT6        | 1.544145845 | ILF2     | 1.019695801 | ZNF638     | -1.336694806 |
| ARHGAP22     | 1.540568381 | ATP5G1   | 1.01682861  | MARCKS     | -1.336402365 |
| SEPW1        | 1.53357038  | THAP4    | 1.016615464 | CIRL       | -1.330378899 |
| NUP155       | 1.5334322   | EEFSEC   | 1.015841516 | PALLD      | -1.329804086 |
| CCDC9        | 1.528207722 | PUF60    | 1.014158542 | PLAU       | -1.325859912 |
| CD3EAP       | 1.528207722 | ARIH2    | 1.00859944  | C17orf91   | -1.324401737 |
| SLC39A3      | 1.527247003 | CCDC86   | 1.00859944  | RAP2B      | -1.322592523 |
| EIF2B4       | 1.509902919 | HMGB2    | 1.007741183 | CSGALNACT1 | -1.321105812 |
| KRT6A        | 1.504736197 | SNRPA1   | 1.005337263 | CYFIP2     | -1.320740203 |
| CECR5        | 1.501429099 | SLC43A3  | 1.005236035 | KRT14      | -1.31752395  |
| RNASEH2A     | 1.498515377 | YARS     | 1.001002452 | DDR1       | -1.312431607 |
| CSF3         | 1.495889933 | PGAM5    | 1.000786138 | CYBASC3    | -1.311967573 |
| MIHFD2       | 1.495129383 | SORD     | 1.000747704 | UACA       | -1.308956947 |
| PHGDH        | 1.479710346 | CHPT1    | 1.000727348 | AKR1C3     | -1.308187117 |
| NIP7         | 1.467188062 | BRX1     | 1.000556918 | CYBRD1     | -1.305524015 |
| RPL11        | 1.464585842 | MRPS2    | 1.000556918 | CRIMI      | -1.304584625 |
| LRFN3        | 1.453717967 | RNASEH1  | 1.000453037 | KIAA0319L  | -1.304507465 |



|          |             |              |              |          |              |
|----------|-------------|--------------|--------------|----------|--------------|
| GPT2     | 1.450116364 | EMG1         | 1.000445482  | P4HA1    | -1.302427376 |
| SH2D2A   | 1.446130965 | RFT1         | 1.000376437  | ANXA1    | -1.302276281 |
| PFKM     | 1.439760553 | OLR1         | -11.16302064 | HES2     | -1.297198401 |
| OSBPL5   | 1.439460973 | ELF3         | -10.50878516 | CD68     | -1.291690864 |
| TCOF1    | 1.439164727 | LCN2         | -10.50878516 | C9orf3   | -1.29008174  |
| SDCCAG3  | 1.436151958 | OCLN         | -9.840777924 | TAPBPL   | -1.288696797 |
| RUVBL1   | 1.425642879 | SORT1        | -9.396604781 | TMEM45A  | -1.283328042 |
| ASPHD2   | 1.424497829 | PSG4         | -9.214319121 | DSC3     | -1.282113581 |
| FAM167A  | 1.424371911 | NGFR         | -8.842350343 | SVIL     | -1.280398025 |
| MYBBP1A  | 1.423392728 | AKR1B10      | -8.842350343 | RIPK4    | -1.278855256 |
| ETV5     | 1.411691236 | ANXA10       | -8.842350343 | TIMP3    | -1.276442195 |
| NCAPD3   | 1.405080375 | PCLO         | -8.842350343 | CERCAM   | -1.276197528 |
| DNMT1    | 1.401398364 | RRAD         | -8.754887502 | AHR      | -1.275567426 |
| SLC27A5  | 1.398549376 | SCGB1A1      | -8.754887502 | ADM      | -1.268785327 |
| ODC1     | 1.397068307 | C3orf47      | -8.661778098 | ARRDC3   | -1.266658028 |
| ABCF2    | 1.393836529 | CHI3L2       | -8.661778098 | ZNF185   | -1.264644081 |
| EXOSC9   | 1.389079709 | CYP24A1      | -8.562242424 | GPR125   | -1.261920786 |
| CUTC     | 1.383490731 | P2RY6        | -8.562242424 | ARHGAP23 | -1.258572997 |
| ERRFI1   | 1.379527623 | LOC100132891 | -8.562242424 | NEDD4L   | -1.255058029 |
| CCDC61   | 1.376375879 | PALMD        | -8.45532722  | EXT1     | -1.252722031 |
| LRRC59   | 1.375153423 | AGR2         | -8.45532722  | MFSD6    | -1.251811591 |
| UPP1     | 1.375153423 | CLDN23       | -8.45532722  | DSC2     | -1.250469708 |
| CENPM    | 1.373458396 | HHAT         | -8.45532722  | PHLDB2   | -1.250373022 |
| TARDBP   | 1.369456465 | SDCCAG8      | -8.45532722  | ST5      | -1.246989785 |
| ERGIC1   | 1.367143828 | LTB          | -4.767203567 | FAM108C1 | -1.246103302 |
| PHF15    | 1.364970045 | CLDN1        | -4.697239316 | SQSTM1   | -1.244208747 |
| KIAA0664 | 1.363036731 | C15orf48     | -4.414202365 | IKBKE    | -1.243377446 |
| TUBA1B   | 1.360055228 | DLL1         | -4.127755547 | TGFB2    | -1.239896912 |
| XPO5     | 1.358448401 | CFB          | -4.114449291 | PPIG     | -1.238208136 |
| PFAS     | 1.357488373 | SERPINB13    | -4.042774024 | LRIG1    | -1.238074044 |
| NAT10    | 1.354541061 | TNFSF10      | -4.042774024 | CHMP4C   | -1.236229377 |
| PLK1     | 1.353775946 | CLU          | -3.987899862 | SLC38A2  | -1.234289304 |
| ZNF259   | 1.352993723 | HIST1H2BD    | -3.905702703 | IL32     | -1.233128806 |
| GEMIN5   | 1.344924293 | PDP1         | -3.780387874 | ETS2     | -1.229657175 |
| PAK4     | 1.344785303 | TACSTD2      | -3.753787635 | KLHL24   | -1.226296876 |
| TIMM44   | 1.337885106 | CPA4         | -3.722557243 | YPEL5    | -1.225350849 |
| BIRC3    | 1.336371637 | STARD5       | -3.58384888  | IL13RA1  | -1.223938884 |
| EGR1     | 1.329680203 | EPPK1        | -3.564031843 | SLU7     | -1.212401419 |
| LETM1    | 1.3237103   | PIK3IP1      | -3.468371663 | FERMT2   | -1.211178257 |
| KCNG1    | 1.323598848 | HIST2H2BE    | -3.459431619 | PTAFR    | -1.209729186 |
| ZNF85    | 1.321928095 | SLC2A12      | -3.458216717 | TMEM212  | -1.204523089 |
| PYGB     | 1.321285065 | KRT15        | -3.384831229 | SCD5     | -1.20070429  |
| LSM10    | 1.317974601 | SPRR2D       | -3.367509129 | CALCOCO1 | -1.196568646 |
| SHMT2    | 1.315638615 | FLJ35776     | -3.32014589  | KIAA1522 | -1.194892301 |
| F12      | 1.314800111 | SEMA3C       | -3.31251585  | SCARA3   | -1.192603333 |
| SMOX     | 1.314777981 | LOC100506895 | -3.247927513 | WDR66    | -1.190342544 |
| KCTD5    | 1.314314911 | SLC22A23     | -3.221437942 | MBNL2    | -1.184634098 |
| MCM6     | 1.311608344 | GXYLT2       | -3.168935159 | HSPB1    | -1.183702522 |
| CLN6     | 1.309328058 | CDK18        | -3.167944637 | CES2     | -1.18224938  |
| ZHX3     | 1.308881203 | PTHLH        | -3.072998362 | TSPYL4   | -1.182241066 |
| C16orf53 | 1.30749961  | C1R          | -3.019899557 | TANK     | -1.179249981 |
| FAM65A   | 1.301616868 | FYB          | -2.973032952 | C1GALT1  | -1.174323174 |
| MIS18A   | 1.297680549 | GRHL3        | -2.962103392 | USP35    | -1.173144359 |
| USP5     | 1.292063454 | ISG15        | -2.95247163  | F3       | -1.168985996 |
| TRIB3    | 1.290566254 | CXADR        | -2.919557007 | TMEM63B  | -1.168935159 |
| POLE3    | 1.287233367 | KIAA1199     | -2.905702703 | CARD10   | -1.162650338 |
| WDR76    | 1.284716169 | ST6GALNAC2   | -2.901281949 | PRKD2    | -1.157584126 |
| ORAI1    | 1.280107919 | KAL1         | -2.886080408 | IFT57    | -1.146807591 |
| UBE2S    | 1.277613666 | RRAGC        | -2.874469118 | MYLK     | -1.141949429 |
| PFDN2    | 1.275675425 | GBP2         | -2.850511493 | STC1     | -1.136288623 |



|            |             |          |              |          |              |
|------------|-------------|----------|--------------|----------|--------------|
| SNRNP70    | 1.271626731 | CCND2    | -2.806400443 | CLIP4    | -1.133113199 |
| ZFP36L2    | 1.269930313 | TM7SF2   | -2.806264037 | GOLGA2   | -1.128264883 |
| CUL4B      | 1.269880474 | CEL      | -2.752907138 | CLDN7    | -1.122730919 |
| NFS1       | 1.269460675 | SRGN     | -2.720845929 | BCKDHA   | -1.118366715 |
| MCL1       | 1.267591712 | UGCG     | -2.654503434 | AQP3     | -1.116104067 |
| KRT81      | 1.266511978 | EFNA1    | -2.653005049 | KLF3     | -1.11599814  |
| CYP27B1    | 1.266254497 | TMPRSS3  | -2.642430602 | C10orf58 | -1.113981351 |
| DIMT1L     | 1.265388824 | DAAM1    | -2.633583033 | TNFAIP8  | -1.111744499 |
| SLC35B4    | 1.261273948 | C5orf4   | -2.630543535 | AFTPH    | -1.106957611 |
| PN01       | 1.258473978 | S100A7   | -2.605859842 | RAPGEF1  | -1.10581412  |
| PUS1       | 1.256223171 | DENND1B  | -2.584962501 | YTHDC1   | -1.102722191 |
| TUBB       | 1.252792402 | MYO5B    | -2.584962501 | C10orf32 | -1.102564161 |
| C12orf11   | 1.247092862 | PLD1     | -2.584220183 | NGFRAP1  | -1.098454755 |
| SH3KBP1    | 1.242890375 | RND3     | -2.58384888  | TSPAN1   | -1.095472997 |
| DDX39A     | 1.240048027 | GBP1     | -2.583477483 | FRMD6    | -1.091409191 |
| PNP        | 1.239910534 | AMIGO2   | -2.536577258 | ZNF561   | -1.08809133  |
| WDR74      | 1.238885969 | C5orf56  | -2.513236725 | DSE      | -1.081445217 |
| C12orf24   | 1.237440224 | FBXO32   | -2.488846534 | C5orf32  | -1.077718097 |
| WDR34      | 1.235857145 | HIST1H1C | -2.413366746 | FAP      | -1.076633964 |
| CCDC58     | 1.233428655 | ZNF385A  | -2.400653581 | CORO2A   | -1.076595691 |
| ARMC6      | 1.229212739 | RNASE7   | -2.349449158 | UBL3     | -1.074493726 |
| FANCA      | 1.224372785 | ARRDC4   | -2.321105812 | DUSP16   | -1.073687907 |
| DTL        | 1.223260312 | SAA2     | -2.320740203 | MRC2     | -1.069116549 |
| SLC25A28   | 1.217890327 | IFI27    | -2.320591647 | EPB49    | -1.068514735 |
| FARSA      | 1.213027003 | CD24     | -2.282764648 | IL1RAP   | -1.065095028 |
| RPF2       | 1.212910926 | SNCAIP   | -2.278535499 | CDH3     | -1.061804439 |
| POLR3K     | 1.212340772 | DQX1     | -2.278535499 | CD9      | -1.059300844 |
| WDR18      | 1.211631529 | CLIC3    | -2.271174794 | HEG1     | -1.05782463  |
| TUBA1C     | 1.209951895 | C1orf74  | -2.271174794 | CALD1    | -1.054827443 |
| ZNF622     | 1.209531503 | MIR210HG | -2.249381404 | TMTC3    | -1.054139335 |
| DEAF1      | 1.207821609 | PRSS23   | -2.243859615 | FCHO2    | -1.050581133 |
| RGL2       | 1.206916895 | PPL      | -2.218297343 | HSP90B1  | -1.046090065 |
| RAD51      | 1.20515349  | C14orf45 | -2.211945634 | COX6C    | -1.043682153 |
| MPRI3      | 1.202679882 | ARID5B   | -2.200471803 | RUNX1    | -1.043314258 |
| HELLS      | 1.201382433 | DST      | -2.197221077 | PGRMC2   | -1.042718464 |
| FSTL3      | 1.20123143  | FBN1     | -2.193787111 | FLJ36031 | -1.042590187 |
| TUBB2C     | 1.197568403 | ENTPD7   | -2.150666646 | NUPR1    | -1.036940788 |
| C1QBP      | 1.195308615 | OTUD1    | -2.130082475 | SERPINE2 | -1.0359128   |
| NCRNA00116 | 1.194816177 | KRT17    | -2.104330961 | RAB13    | -1.032400966 |
| SSU72      | 1.192583758 | ULBP2    | -2.085890421 | GDF15    | -1.030546802 |
| TACC3      | 1.186255229 | SLFN12   | -2.085890421 | SLC9A1   | -1.030324537 |
| PROCR      | 1.181760359 | GPR56    | -2.075203368 | SCPEP1   | -1.029985009 |
| GOT1       | 1.181236188 | DRAM1    | -2.072190512 | ZMIZ1    | -1.02772883  |
| MTERFD1    | 1.180896119 | LRP1     | -2.062968279 | SPATS2L  | -1.026678532 |
| UBIAD1     | 1.174340292 | SYNPO    | -2.060286924 | PI4K2A   | -1.022770008 |
| PYCR1      | 1.171261449 | FAM134B  | -2.053457942 | C6orf120 | -1.022532213 |
| IMPDH1     | 1.170849002 | MYL9     | -2.045501559 | PKD1     | -1.019899557 |
| RAPH1      | 1.170828905 | FAAH2    | -2.042774024 | DHRS3    | -1.016985889 |
| VPS4A      | 1.169094195 | TPM1     | -2.041537949 | GJB2     | -1.015815715 |
| MED24      | 1.168926384 | PLOD2    | -2.040618064 | LRPAP1   | -1.01573674  |
| FTSJ1      | 1.167456746 | FXYD3    | -2.020547964 | MLL5     | -1.01544987  |
| FERMT1     | 1.165543584 | CLCA2    | -1.992346427 | HINT3    | -1.013037275 |
| RRM2       | 1.165488059 | ITGAV    | -1.983613527 | UBE2H    | -1.004546874 |
| EIF3I      | 1.162402694 | NTN4     | -1.973032952 | BLOC1S2  | -1.003495133 |
| CEBPB      | 1.162135501 | PLK2     | -1.966211687 |          |              |
| NOLC1      | 1.16080051  | TNC      | -1.965589969 |          |              |
| GNL3       | 1.160454692 | PPP1R3B  | -1.958594483 |          |              |
| CDCA4      | 1.157921154 | VAV3     | -1.957830546 |          |              |
| TWF2       | 1.157646672 | NDRG1    | -1.954734343 |          |              |
| NUP88      | 1.155866342 | BDKRB2   | -1.94858947  |          |              |

## Supplementary Table 2

The interactions between AURKA regulated differentially expressed genes are shown.

| Node1    | Node2    | Neighborhood | Fusion | Cooccurrence | Homology | Coexpression | Experimental | Knowledge | Textmining | Combined score |
|----------|----------|--------------|--------|--------------|----------|--------------|--------------|-----------|------------|----------------|
| ABLIM3   | RAC3     | 0            | 0      | 0            | 0        | 0            | 0            | 0.8       | 0          | 0.8            |
| ACOT7    | UBIAD1   | 0            | 0      | 0            | 0        | 0            | 0            | 0.9       | 0          | 0.899          |
| ADAM8    | SVIL     | 0            | 0      | 0            | 0        | 0            | 0            | 0.72      | 0          | 0.72           |
| AGR2     | AREG     | 0            | 0      | 0            | 0        | 0            | 0            | 0         | 0.833      | 0.833          |
| AHR      | CYP24A1  | 0            | 0      | 0            | 0        | 0            | 0            | 0         | 0.8        | 0.8            |
| ALG3     | RFT1     | 0            | 0      | 0            | 0        | 0            | 0            | 0.9       | 0.088      | 0.902          |
| ANGPTL4  | MED8     | 0            | 0      | 0            | 0        | 0            | 0            | 0.9       | 0          | 0.899          |
| AOX1     | MAOA     | 0            | 0      | 0            | 0        | 0            | 0            | 0.9       | 0.275      | 0.922          |
| ATRIP    | CDC45    | 0            | 0      | 0            | 0        | 0            | 0            | 0.9       | 0.509      | 0.947          |
| ATRIP    | MCM6     | 0            | 0      | 0            | 0        | 0            | 0            | 0.9       | 0.236      | 0.918          |
| ATRIP    | MCM5     | 0            | 0      | 0            | 0        | 0.119        | 0            | 0.9       | 0.421      | 0.941          |
| ATRIP    | CDC6     | 0            | 0      | 0            | 0        | 0            | 0.621        | 0.9       | 0.262      | 0.968          |
| AURKB    | CDC6     | 0            | 0      | 0            | 0        | 0.678        | 0            | 0         | 0.341      | 0.773          |
| AURKB    | CENPK    | 0            | 0      | 0            | 0        | 0.354        | 0            | 0.9       | 0.103      | 0.933          |
| AURKB    | RRM2     | 0            | 0      | 0            | 0        | 0.772        | 0            | 0         | 0.215      | 0.808          |
| AURKB    | GINS2    | 0            | 0      | 0            | 0        | 0.7          | 0            | 0         | 0.113      | 0.716          |
| AURKB    | PLK1     | 0            | 0      | 0            | 0.824    | 0.747        | 0            | 0.9       | 0.784      | 0.976          |
| AURKB    | NCAPH    | 0            | 0      | 0            | 0        | 0.69         | 0.62         | 0.9       | 0.129      | 0.987          |
| AURKB    | CENPM    | 0            | 0      | 0            | 0        | 0.772        | 0            | 0.9       | 0          | 0.975          |
| AURKB    | CHMP4C   | 0            | 0      | 0            | 0        | 0            | 0            | 0         | 0.806      | 0.806          |
| AURKB    | CDC45    | 0            | 0      | 0            | 0        | 0.796        | 0            | 0         | 0.262      | 0.839          |
| AURKB    | CDC45    | 0            | 0      | 0            | 0        | 0.772        | 0            | 0         | 0.286      | 0.826          |
| AURKB    | NUF2     | 0            | 0      | 0            | 0        | 0.611        | 0.62         | 0.9       | 0.532      | 0.991          |
| AURKB    | TRIP13   | 0            | 0      | 0            | 0        | 0.711        | 0            | 0         | 0.136      | 0.734          |
| AURKB    | MYBL2    | 0            | 0      | 0            | 0        | 0.723        | 0            | 0         | 0.144      | 0.746          |
| AURKB    | EXO1     | 0            | 0      | 0            | 0        | 0.722        | 0            | 0         | 0          | 0.722          |
| BDKRB2   | PTAFR    | 0            | 0      | 0            | 0.8      | 0            | 0            | 0.9       | 0.196      | 0.902          |
| BDKRB2   | PIK3R1   | 0            | 0      | 0            | 0        | 0            | 0            | 0.9       | 0.082      | 0.902          |
| BDKRB2   | ANXA1    | 0            | 0      | 0            | 0        | 0            | 0            | 0.9       | 0.065      | 0.9            |
| BDNF     | EIF4EBP1 | 0            | 0      | 0            | 0        | 0            | 0            | 0         | 0.831      | 0.831          |
| BDNF     | DDR1     | 0            | 0      | 0            | 0        | 0            | 0            | 0         | 0.81       | 0.81           |
| BDNF     | EHD4     | 0            | 0      | 0            | 0        | 0            | 0            | 0.9       | 0          | 0.899          |
| BDNF     | FOS      | 0            | 0      | 0            | 0        | 0            | 0            | 0         | 0.929      | 0.929          |
| BDNF     | NTF4     | 0            | 0      | 0            | 0.905    | 0            | 0.9          | 0         | 0.87       | 0.908          |
| BDNF     | TPM1     | 0            | 0      | 0            | 0        | 0            | 0            | 0         | 0.917      | 0.917          |
| BDNF     | SORT1    | 0            | 0      | 0            | 0        | 0            | 0.846        | 0.9       | 0.43       | 0.99           |
| BDNF     | NGFR     | 0            | 0      | 0            | 0        | 0            | 0            | 0.9       | 0.968      | 0.996          |
| BIRC3    | CSF3     | 0            | 0      | 0            | 0        | 0            | 0            | 0         | 0.835      | 0.835          |
| BLOC1S2  | IFT57    | 0            | 0      | 0            | 0        | 0            | 0.621        | 0         | 0.292      | 0.714          |
| BNIP3L   | IKBKE    | 0            | 0      | 0            | 0        | 0            | 0            | 0         | 0.808      | 0.808          |
| BOP1     | NIP7     | 0            | 0      | 0            | 0        | 0.683        | 0.346        | 0         | 0.148      | 0.799          |
| BOP1     | BYSL     | 0            | 0      | 0            | 0        | 0.779        | 0            | 0         | 0.095      | 0.787          |
| BOP1     | NAT10    | 0            | 0      | 0            | 0        | 0.738        | 0            | 0         | 0          | 0.738          |
| BRIX1    | POLR2E   | 0            | 0      | 0            | 0        | 0.759        | 0            | 0         | 0          | 0.759          |
| BRIX1    | BOP1     | 0            | 0      | 0            | 0        | 0.617        | 0.323        | 0         | 0.226      | 0.771          |
| BRIX1    | PNO1     | 0            | 0      | 0            | 0        | 0.882        | 0            | 0         | 0          | 0.882          |
| BRIX1    | SNRPD1   | 0            | 0      | 0            | 0        | 0.785        | 0            | 0         | 0          | 0.786          |
| BRIX1    | BYSL     | 0            | 0      | 0            | 0        | 0.85         | 0            | 0         | 0          | 0.85           |
| BRIX1    | DIMT1L   | 0            | 0      | 0            | 0        | 0.86         | 0            | 0         | 0          | 0.86           |
| BRIX1    | SNRPA1   | 0            | 0      | 0            | 0        | 0.821        | 0            | 0         | 0          | 0.821          |
| BRIX1    | NOC4L    | 0            | 0      | 0            | 0        | 0.718        | 0            | 0         | 0          | 0.718          |
| BRIX1    | POLR1B   | 0            | 0      | 0            | 0        | 0.734        | 0            | 0         | 0          | 0.734          |
| BRIX1    | NIP7     | 0            | 0      | 0            | 0        | 0.902        | 0.64         | 0         | 0.071      | 0.963          |
| BRIX1    | EMG1     | 0            | 0      | 0            | 0        | 0.837        | 0            | 0         | 0          | 0.837          |
| BRIX1    | NAT10    | 0            | 0      | 0            | 0        | 0.788        | 0            | 0         | 0          | 0.788          |
| BRIX1    | NUP155   | 0            | 0      | 0            | 0        | 0.776        | 0            | 0         | 0          | 0.776          |
| BRIX1    | DDX56    | 0            | 0      | 0            | 0        | 0.563        | 0.3          | 0         | 0.22       | 0.728          |
| BRIX1    | TBL3     | 0            | 0      | 0            | 0        | 0.708        | 0            | 0         | 0          | 0.708          |
| BYSL     | DIMT1L   | 0            | 0      | 0            | 0        | 0.804        | 0.7          | 0         | 0.25       | 0.95           |
| C13orf15 | RUNX1    | 0            | 0      | 0            | 0        | 0            | 0            | 0         | 0.817      | 0.817          |
| C21orf45 | CENPK    | 0            | 0      | 0            | 0        | 0.388        | 0            | 0.9       | 0          | 0.934          |
| C5orf4   | SCARA3   | 0            | 0      | 0            | 0        | 0            | 0            | 0         | 0.715      | 0.715          |
| C5orf4   | TM7SF2   | 0            | 0      | 0            | 0        | 0            | 0            | 0.9       | 0          | 0.899          |
| CA2      | GDF15    | 0            | 0      | 0            | 0        | 0            | 0            | 0         | 0.829      | 0.829          |
| CA2      | SLC9A1   | 0            | 0      | 0            | 0        | 0            | 0.846        | 0         | 0.218      | 0.872          |
| CAD      | PPAT     | 0.247        | 0      | 0            | 0        | 0.207        | 0            | 0.9       | 0.543      | 0.966          |
| CAD      | ASNS     | 0            | 0      | 0            | 0        | 0.161        | 0            | 0.9       | 0          | 0.91           |
| CALD1    | MYLK     | 0            | 0      | 0            | 0        | 0.405        | 0            | 0.9       | 0.947      | 0.996          |
| CALD1    | TPM1     | 0            | 0      | 0            | 0        | 0.3          | 0            | 0.9       | 0.954      | 0.996          |
| CCL20    | BDKRB2   | 0            | 0      | 0            | 0        | 0            | 0            | 0.9       | 0          | 0.899          |
| CCL20    | ANXA1    | 0            | 0      | 0            | 0        | 0            | 0            | 0.9       | 0.068      | 0.9            |
| CCND2    | NGFR     | 0            | 0      | 0            | 0        | 0            | 0            | 0         | 0.813      | 0.813          |
| CCND2    | CDK4     | 0            | 0      | 0            | 0        | 0            | 0.999        | 0.9       | 0.954      | 0.999          |
| CCND3    | MED8     | 0            | 0      | 0            | 0        | 0            | 0            | 0.9       | 0          | 0.899          |
| CCND3    | MED24    | 0            | 0      | 0            | 0        | 0            | 0            | 0.9       | 0          | 0.899          |
| CCND3    | RUNX1    | 0            | 0      | 0            | 0        | 0            | 0.621        | 0         | 0.341      | 0.733          |
| CCND3    | NOTCH1   | 0            | 0      | 0            | 0        | 0            | 0            | 0         | 0.854      | 0.854          |
| CCND3    | PIK3R1   | 0            | 0      | 0            | 0        | 0            | 0            | 0.9       | 0.105      | 0.904          |
| CCND3    | CDK4     | 0            | 0      | 0            | 0        | 0            | 0.999        | 0.9       | 0.955      | 0.999          |
| CCND3    | E2F1     | 0            | 0      | 0            | 0        | 0            | 0            | 0.9       | 0.341      | 0.929          |
| CCND3    | MCM10    | 0            | 0      | 0            | 0        | 0            | 0.925        | 0         | 0          | 0.925          |
| CCND3    | CCND2    | 0            | 0      | 0            | 0.95     | 0            | 0            | 0.9       | 0.84       | 0.904          |
| CDA      | UPP1     | 0.426        | 0      | 0            | 0        | 0            | 0            | 0.9       | 0.499      | 0.967          |
| CDA      | PNP      | 0.797        | 0      | 0            | 0        | 0            | 0            | 0.9       | 0.592      | 0.99           |
| CDC45    | MYBL2    | 0            | 0      | 0            | 0        | 0.782        | 0            | 0         | 0.108      | 0.793          |
| CDC45    | HELLS    | 0            | 0      | 0            | 0        | 0.82         | 0            | 0         | 0.071      | 0.822          |

| Node1   | Node2      | Neighborhood | Fusion | Cooccurrence | Homology | Coexpression | Experimental | Knowledge | Textmining | Combined_score |
|---------|------------|--------------|--------|--------------|----------|--------------|--------------|-----------|------------|----------------|
| CDC45   | CENPK      | 0            | 0      | 0            | 0        | 0.807        | 0            | 0         | 0.244      | 0.845          |
| CDC45   | TRIP13     | 0            | 0      | 0            | 0        | 0.912        | 0            | 0         | 0.18       | 0.923          |
| CDC45   | CDC6       | 0            | 0      | 0            | 0        | 0.946        | 0            | 0.9       | 0.752      | 0.998          |
| CDC45   | GINS2      | 0            | 0      | 0            | 0        | 0.922        | 0.389        | 0.9       | 0.228      | 0.995          |
| CDC45   | RNASEH2A   | 0            | 0      | 0            | 0        | 0.841        | 0            | 0         | 0.164      | 0.859          |
| CDC45   | NUP155     | 0            | 0      | 0            | 0        | 0.711        | 0            | 0         | 0.103      | 0.723          |
| CDC45   | CENPM      | 0            | 0      | 0            | 0        | 0.868        | 0            | 0         | 0.126      | 0.877          |
| CDC45   | CDK4       | 0            | 0      | 0            | 0        | 0.224        | 0.926        | 0         | 0.318      | 0.955          |
| CDC45   | MCM5       | 0            | 0      | 0            | 0        | 0.838        | 0.492        | 0.9       | 0.927      | 0.999          |
| CDC45   | NCAPH      | 0            | 0      | 0            | 0        | 0.892        | 0            | 0         | 0          | 0.892          |
| CDC6    | TRIP13     | 0            | 0      | 0            | 0        | 0.884        | 0            | 0         | 0.125      | 0.892          |
| CDCA5   | HELLS      | 0            | 0      | 0            | 0        | 0.706        | 0            | 0         | 0          | 0.706          |
| CDCA5   | CDC6       | 0            | 0      | 0            | 0        | 0.91         | 0            | 0         | 0.317      | 0.934          |
| CDCA5   | GINS2      | 0            | 0      | 0            | 0        | 0.88         | 0            | 0         | 0.128      | 0.889          |
| CDCA5   | MCM6       | 0            | 0      | 0            | 0        | 0.781        | 0            | 0         | 0.229      | 0.82           |
| CDCA5   | CENPM      | 0            | 0      | 0            | 0        | 0.876        | 0            | 0         | 0.086      | 0.879          |
| CDCA5   | CENPK      | 0            | 0      | 0            | 0        | 0.788        | 0            | 0         | 0.271      | 0.835          |
| CDCA5   | NCAPH      | 0            | 0      | 0            | 0        | 0.85         | 0            | 0         | 0.173      | 0.868          |
| CDCA5   | NUF2       | 0            | 0      | 0            | 0        | 0.919        | 0            | 0         | 0.145      | 0.926          |
| CDCA5   | TRIP13     | 0            | 0      | 0            | 0        | 0.846        | 0            | 0         | 0.261      | 0.879          |
| CDCA5   | RAD51      | 0            | 0      | 0            | 0        | 0.814        | 0            | 0         | 0.077      | 0.817          |
| CDCA5   | CDC45      | 0            | 0      | 0            | 0        | 0.923        | 0            | 0         | 0.196      | 0.934          |
| CDH1    | SNAI2      | 0            | 0      | 0            | 0        | 0            | 0            | 0         | 0.907      | 0.907          |
| CDH1    | CDC6       | 0            | 0      | 0            | 0        | 0            | 0            | 0         | 0.824      | 0.824          |
| CDH3    | CDH1       | 0            | 0      | 0            | 0.945    | 0.275        | 0.619        | 0         | 0.584      | 0.714          |
| CDK4    | CDC6       | 0            | 0      | 0            | 0        | 0.199        | 0.389        | 0         | 0.514      | 0.729          |
| CDK4    | JUND       | 0            | 0      | 0            | 0        | 0            | 0            | 0.9       | 0.842      | 0.983          |
| CDK4    | AHR        | 0            | 0      | 0            | 0        | 0            | 0            | 0         | 0.847      | 0.847          |
| CEBPB   | HSP90B1    | 0            | 0      | 0            | 0        | 0            | 0            | 0.9       | 0          | 0.899          |
| CEBPB   | RUNX1      | 0            | 0      | 0            | 0        | 0            | 0.621        | 0         | 0.261      | 0.701          |
| CEBPB   | EGR1       | 0            | 0      | 0            | 0        | 0            | 0.621        | 0         | 0.261      | 0.701          |
| CEBPB   | MED8       | 0            | 0      | 0            | 0        | 0            | 0            | 0.9       | 0          | 0.899          |
| CEL     | MGLL       | 0            | 0      | 0            | 0        | 0            | 0            | 0.9       | 0.148      | 0.909          |
| CELSR2  | SORT1      | 0            | 0      | 0            | 0        | 0            | 0            | 0         | 0.734      | 0.734          |
| CENPK   | CENPM      | 0            | 0      | 0            | 0        | 0.538        | 0            | 0.9       | 0.379      | 0.967          |
| CENPK   | CDC6       | 0            | 0      | 0            | 0        | 0.782        | 0            | 0         | 0.122      | 0.796          |
| CENPK   | TRIP13     | 0            | 0      | 0            | 0        | 0.741        | 0            | 0         | 0.32       | 0.812          |
| CENPK   | HELLS      | 0            | 0      | 0            | 0        | 0.788        | 0            | 0         | 0.075      | 0.791          |
| CENPM   | CDC6       | 0            | 0      | 0            | 0        | 0.798        | 0            | 0         | 0          | 0.798          |
| CENPM   | TRIP13     | 0            | 0      | 0            | 0        | 0.765        | 0            | 0         | 0.164      | 0.791          |
| CHMP4C  | VPS4A      | 0            | 0      | 0            | 0        | 0            | 0.586        | 0.9       | 0.462      | 0.974          |
| CLDN1   | CD9        | 0            | 0      | 0            | 0        | 0            | 0            | 0         | 0.817      | 0.817          |
| CLDN7   | CD9        | 0            | 0      | 0            | 0        | 0            | 0            | 0         | 0.846      | 0.846          |
| CLDN7   | CLDN1      | 0            | 0      | 0            | 0.953    | 0            | 0            | 0.8       | 0.786      | 0.807          |
| CLDN7   | CDH1       | 0            | 0      | 0            | 0        | 0.43         | 0            | 0         | 0.896      | 0.936          |
| CLDN7   | OCLN       | 0            | 0      | 0            | 0        | 0            | 0            | 0.8       | 0.66       | 0.927          |
| CLU     | SPARC      | 0            | 0      | 0            | 0        | 0.069        | 0            | 0.9       | 0.24       | 0.919          |
| CLU     | SRGN       | 0            | 0      | 0            | 0        | 0            | 0            | 0.9       | 0.122      | 0.906          |
| CSNK2A1 | FKBP4      | 0            | 0      | 0            | 0        | 0            | 0.621        | 0         | 0.823      | 0.928          |
| CUL4B   | DTL        | 0            | 0      | 0            | 0        | 0            | 0.663        | 0.9       | 0.426      | 0.978          |
| CUL4B   | AHR        | 0            | 0      | 0            | 0        | 0            | 0.62         | 0         | 0.627      | 0.848          |
| CYFIP2  | RAC3       | 0            | 0      | 0            | 0        | 0            | 0            | 0.8       | 0.551      | 0.904          |
| DDR1    | NOTCH1     | 0            | 0      | 0            | 0        | 0            | 0            | 0         | 0.811      | 0.811          |
| DDR1    | BTF3L4     | 0            | 0      | 0            | 0        | 0            | 0            | 0.9       | 0          | 0.899          |
| DDR1    | ACOT7      | 0            | 0      | 0            | 0        | 0            | 0            | 0.9       | 0          | 0.899          |
| DDR1    | EPHB3      | 0            | 0      | 0            | 0        | 0            | 0            | 0         | 0.822      | 0.822          |
| DENND1B | NUF2       | 0            | 0      | 0            | 0        | 0            | 0            | 0.9       | 0          | 0.899          |
| DEPDC1  | DTL        | 0            | 0      | 0            | 0        | 0.778        | 0            | 0         | 0          | 0.778          |
| DEPDC1  | RRM2       | 0            | 0      | 0            | 0        | 0.734        | 0            | 0         | 0.104      | 0.746          |
| DEPDC1  | NUF2       | 0            | 0      | 0            | 0        | 0.873        | 0            | 0         | 0.121      | 0.881          |
| DEPDC1  | UBE2T      | 0            | 0      | 0            | 0        | 0.73         | 0            | 0         | 0          | 0.73           |
| DEPDC1  | CDCA5      | 0            | 0      | 0            | 0        | 0.787        | 0            | 0         | 0          | 0.787          |
| DEPDC1  | CDC45      | 0            | 0      | 0            | 0        | 0.761        | 0            | 0         | 0          | 0.761          |
| DEPDC1  | PRC1       | 0            | 0      | 0            | 0        | 0.7          | 0            | 0         | 0          | 0.7            |
| DEPDC1  | CENPK      | 0            | 0      | 0            | 0        | 0.766        | 0            | 0         | 0          | 0.767          |
| DEPDC1  | KIF2C      | 0            | 0      | 0            | 0        | 0.758        | 0            | 0         | 0.102      | 0.768          |
| DEPDC1  | CDC6       | 0            | 0      | 0            | 0        | 0.748        | 0            | 0         | 0.076      | 0.752          |
| DEPDC1  | TRIP13     | 0            | 0      | 0            | 0        | 0.72         | 0            | 0         | 0          | 0.72           |
| DEPDC1  | EXO1       | 0            | 0      | 0            | 0        | 0.79         | 0            | 0         | 0.081      | 0.794          |
| DEPDC1  | MCM10      | 0            | 0      | 0            | 0        | 0.713        | 0            | 0         | 0          | 0.712          |
| DLL1    | HES7       | 0            | 0      | 0            | 0        | 0            | 0            | 0         | 0.902      | 0.902          |
| DLL1    | NOTCH1     | 0            | 0      | 0            | 0.811    | 0            | 0.62         | 0.9       | 0.968      | 0.966          |
| DLL1    | DLG1       | 0            | 0      | 0            | 0        | 0            | 0            | 0         | 0.8        | 0.8            |
| DNER    | NOTCH1     | 0            | 0      | 0            | 0.828    | 0            | 0            | 0.9       | 0.38       | 0.905          |
| DNMT1   | RUNX1      | 0            | 0      | 0            | 0        | 0            | 0.621        | 0         | 0.275      | 0.706          |
| DNMT1   | HELLS      | 0            | 0      | 0            | 0        | 0.467        | 0.62         | 0         | 0.851      | 0.965          |
| DNMT1   | MCM6       | 0            | 0      | 0            | 0        | 0.694        | 0            | 0         | 0.108      | 0.709          |
| DNMT1   | FOS        | 0            | 0      | 0            | 0        | 0            | 0            | 0         | 0.859      | 0.859          |
| DNMT1   | E2F1       | 0            | 0      | 0            | 0        | 0.105        | 0.619        | 0.9       | 0.146      | 0.964          |
| DSC3    | JUP        | 0            | 0      | 0            | 0        | 0            | 0.621        | 0         | 0.563      | 0.823          |
| DSE     | CSGALNACT1 | 0            | 0      | 0            | 0        | 0            | 0            | 0.9       | 0.086      | 0.902          |
| DST     | KRT14      | 0            | 0      | 0            | 0        | 0            | 0.621        | 0         | 0.402      | 0.758          |
| DTL     | NCAPH      | 0            | 0      | 0            | 0        | 0.853        | 0            | 0         | 0          | 0.853          |
| DTL     | EXO1       | 0            | 0      | 0            | 0        | 0.938        | 0            | 0         | 0.071      | 0.939          |
| DTL     | MCM10      | 0            | 0      | 0            | 0        | 0.871        | 0            | 0         | 0.163      | 0.885          |
| DTL     | NUF2       | 0            | 0      | 0            | 0        | 0.888        | 0            | 0         | 0.07       | 0.889          |



| Node1    | Node2    | Neighborhood | Fusion | Cooccurrence | Homology | Coexpression | Experimental | Knowledge | Textmining | Combined score |
|----------|----------|--------------|--------|--------------|----------|--------------|--------------|-----------|------------|----------------|
| DTL      | CDC45    | 0            | 0      | 0            | 0        | 0.945        | 0            | 0         | 0.162      | 0.951          |
| DTL      | MCM6     | 0            | 0      | 0            | 0        | 0.82         | 0            | 0         | 0.11       | 0.829          |
| DTL      | CDC6     | 0            | 0      | 0            | 0        | 0.948        | 0            | 0         | 0.29       | 0.96           |
| DTL      | HELLS    | 0            | 0      | 0            | 0        | 0.857        | 0            | 0         | 0          | 0.857          |
| DTL      | CDC45    | 0            | 0      | 0            | 0        | 0.874        | 0            | 0         | 0.086      | 0.877          |
| DTL      | RRM2     | 0            | 0      | 0            | 0        | 0.906        | 0            | 0         | 0.092      | 0.909          |
| DTL      | CENPK    | 0            | 0      | 0            | 0        | 0.86         | 0            | 0         | 0          | 0.86           |
| DTL      | TRIP13   | 0            | 0      | 0            | 0        | 0.849        | 0            | 0         | 0.133      | 0.861          |
| DTL      | RAD51    | 0            | 0      | 0            | 0        | 0.849        | 0            | 0         | 0.072      | 0.851          |
| DTL      | CENPM    | 0            | 0      | 0            | 0        | 0.797        | 0            | 0         | 0          | 0.797          |
| DTL      | GIN52    | 0            | 0      | 0            | 0        | 0.872        | 0            | 0         | 0.126      | 0.881          |
| DTYMK    | CDC6     | 0            | 0      | 0            | 0        | 0.711        | 0            | 0         | 0.252      | 0.769          |
| DTYMK    | RNASEH2A | 0            | 0      | 0            | 0        | 0.713        | 0            | 0         | 0.097      | 0.724          |
| DTYMK    | MCM6     | 0            | 0      | 0            | 0        | 0.726        | 0            | 0         | 0.065      | 0.727          |
| DTYMK    | GIN52    | 0            | 0      | 0            | 0        | 0.694        | 0            | 0         | 0.137      | 0.718          |
| DTYMK    | MCM5     | 0            | 0      | 0            | 0        | 0.708        | 0            | 0         | 0.102      | 0.72           |
| DTYMK    | CDC45    | 0            | 0      | 0            | 0        | 0.784        | 0            | 0         | 0.086      | 0.79           |
| DTYMK    | RRM2     | 0            | 0      | 0.29         | 0        | 0.759        | 0            | 0.9       | 0.297      | 0.98           |
| DUSP4    | EGR1     | 0            | 0      | 0            | 0        | 0            | 0            | 0         | 0.85       | 0.85           |
| E2F1     | CCND2    | 0            | 0      | 0            | 0        | 0            | 0            | 0.9       | 0.341      | 0.929          |
| E2F1     | CDK4     | 0            | 0      | 0            | 0        | 0.133        | 0            | 0.9       | 0.564      | 0.956          |
| E2F1     | NOTCH1   | 0            | 0      | 0            | 0        | 0            | 0            | 0.9       | 0.221      | 0.916          |
| E2F1     | MYBL2    | 0            | 0      | 0            | 0        | 0.5          | 0.588        | 0.9       | 0.305      | 0.982          |
| E2F1     | NGFR     | 0            | 0      | 0            | 0        | 0            | 0            | 0.9       | 0.087      | 0.902          |
| E2F1     | SORT1    | 0            | 0      | 0            | 0        | 0            | 0            | 0.9       | 0          | 0.899          |
| E2F1     | CDC45    | 0            | 0      | 0            | 0        | 0.654        | 0            | 0.9       | 0.103      | 0.964          |
| E2F1     | CDC6     | 0            | 0      | 0            | 0        | 0.464        | 0            | 0.9       | 0.425      | 0.964          |
| E2F1     | RRM2     | 0            | 0      | 0            | 0        | 0.38         | 0            | 0.9       | 0.829      | 0.987          |
| EFNA1    | PIK3R1   | 0            | 0      | 0            | 0        | 0            | 0            | 0.9       | 0          | 0.899          |
| EGR1     | CSF3     | 0            | 0      | 0.32         | 0        | 0            | 0            | 0         | 0.832      | 0.832          |
| EGR1     | CSNK2A1  | 0            | 0      | 0            | 0        | 0            | 0.621        | 0         | 0.803      | 0.92           |
| EGR1     | DUSP1    | 0            | 0      | 0            | 0        | 0.545        | 0            | 0         | 0.851      | 0.928          |
| EIF3B    | GTPBP4   | 0            | 0      | 0            | 0        | 0.743        | 0            | 0         | 0          | 0.744          |
| EIF3I    | GTPBP4   | 0            | 0      | 0            | 0        | 0.708        | 0            | 0         | 0          | 0.708          |
| EIF3I    | NIP7     | 0            | 0      | 0            | 0        | 0.721        | 0            | 0         | 0          | 0.721          |
| EIF3I    | EIF3B    | 0            | 0      | 0            | 0        | 0.651        | 0.984        | 0.9       | 0.412      | 0.999          |
| EIF4EBP1 | LRPAP1   | 0            | 0      | 0            | 0        | 0            | 0.62         | 0         | 0.395      | 0.754          |
| EMG1     | NIP7     | 0            | 0      | 0            | 0        | 0.855        | 0            | 0         | 0.079      | 0.858          |
| EMG1     | BYSL     | 0            | 0      | 0            | 0        | 0.819        | 0.586        | 0         | 0.424      | 0.951          |
| EMG1     | C1QBP    | 0            | 0      | 0            | 0        | 0.755        | 0            | 0         | 0          | 0.755          |
| EMG1     | NAT10    | 0            | 0      | 0            | 0        | 0.76         | 0.644        | 0         | 0.479      | 0.949          |
| EMG1     | POLR2E   | 0            | 0      | 0.237        | 0        | 0.762        | 0            | 0         | 0          | 0.806          |
| EMG1     | DMT1L    | 0            | 0      | 0            | 0        | 0.727        | 0            | 0         | 0.089      | 0.734          |
| EPHB3    | EFNB2    | 0            | 0      | 0            | 0        | 0            | 0            | 0.9       | 0.784      | 0.976          |
| EPHB3    | SOX9     | 0            | 0      | 0            | 0        | 0            | 0            | 0         | 0.842      | 0.842          |
| EREG     | AHR      | 0            | 0      | 0            | 0        | 0            | 0            | 0         | 0.818      | 0.818          |
| ETS2     | FOS      | 0            | 0      | 0            | 0        | 0            | 0.619        | 0         | 0.341      | 0.732          |
| EXO1     | CENPM    | 0            | 0      | 0            | 0        | 0.784        | 0            | 0         | 0          | 0.784          |
| EXO1     | HELLS    | 0            | 0      | 0            | 0        | 0.838        | 0            | 0         | 0          | 0.839          |
| EXO1     | MCM6     | 0            | 0.002  | 0            | 0        | 0.837        | 0            | 0         | 0.086      | 0.841          |
| EXO1     | GIN52    | 0            | 0      | 0            | 0        | 0.803        | 0            | 0         | 0.087      | 0.808          |
| EXO1     | CENPK    | 0            | 0      | 0            | 0        | 0.785        | 0            | 0         | 0          | 0.785          |
| EXO1     | NUP155   | 0            | 0      | 0            | 0        | 0.709        | 0            | 0         | 0          | 0.709          |
| EXO1     | NUF2     | 0            | 0      | 0            | 0        | 0.884        | 0            | 0         | 0          | 0.885          |
| EXO1     | RAD51    | 0            | 0      | 0            | 0        | 0.843        | 0            | 0         | 0.613      | 0.935          |
| EXO1     | CDC45    | 0            | 0      | 0            | 0        | 0.888        | 0            | 0         | 0.163      | 0.9            |
| EXO1     | RRM2     | 0            | 0      | 0            | 0        | 0.858        | 0            | 0         | 0.111      | 0.866          |
| EXO1     | CDC6     | 0            | 0      | 0            | 0        | 0.913        | 0            | 0         | 0.162      | 0.922          |
| EXO1     | TRIP13   | 0            | 0      | 0            | 0        | 0.89         | 0            | 0         | 0.104      | 0.895          |
| EXO1     | NCAPH    | 0            | 0      | 0            | 0        | 0.851        | 0            | 0         | 0.146      | 0.864          |
| EXO1     | CDC45    | 0            | 0      | 0            | 0        | 0.942        | 0            | 0         | 0.126      | 0.946          |
| EXOSC4   | BYSL     | 0            | 0      | 0            | 0        | 0.63         | 0            | 0         | 0.348      | 0.743          |
| EXOSC4   | NIP7     | 0            | 0      | 0            | 0        | 0.632        | 0            | 0         | 0.34       | 0.741          |
| EXOSC4   | ZFP36    | 0            | 0      | 0            | 0        | 0            | 0            | 0.9       | 0          | 0.899          |
| EXOSC9   | ZFP36    | 0            | 0      | 0            | 0        | 0            | 0            | 0.9       | 0          | 0.899          |
| EXOSC9   | EXOSC4   | 0.322        | 0      | 0.484        | 0        | 0.104        | 0.998        | 0.9       | 0.212      | 0.999          |
| F12      | C1QBP    | 0            | 0      | 0            | 0        | 0            | 0            | 0.9       | 0.514      | 0.948          |
| F2R      | PROCR    | 0            | 0      | 0            | 0        | 0            | 0.621        | 0         | 0.79       | 0.915          |
| F2R      | P2RY6    | 0            | 0      | 0            | 0.793    | 0            | 0            | 0.9       | 0.129      | 0.901          |
| F2R      | ANXA1    | 0            | 0      | 0            | 0        | 0            | 0            | 0.9       | 0.101      | 0.904          |
| F2R      | PTAFR    | 0            | 0      | 0            | 0.792    | 0            | 0            | 0.9       | 0.241      | 0.903          |
| F2R      | EGR1     | 0            | 0      | 0            | 0        | 0            | 0            | 0         | 0.828      | 0.828          |
| F2R      | BDKRB2   | 0            | 0      | 0            | 0.741    | 0            | 0            | 0.9       | 0.464      | 0.911          |
| F2R      | PIK3R1   | 0            | 0      | 0            | 0        | 0            | 0            | 0.9       | 0          | 0.899          |
| F2R      | CDH1     | 0            | 0      | 0            | 0        | 0            | 0            | 0         | 0.838      | 0.838          |
| F3       | F12      | 0            | 0      | 0            | 0        | 0            | 0            | 0         | 0.752      | 0.752          |
| F3       | EGR1     | 0            | 0      | 0            | 0        | 0            | 0            | 0         | 0.902      | 0.902          |
| FANCA    | EXO1     | 0            | 0      | 0            | 0        | 0.684        | 0            | 0         | 0.264      | 0.751          |
| FANCA    | ATRIP    | 0            | 0      | 0            | 0        | 0            | 0            | 0.9       | 0.167      | 0.911          |
| FANCA    | RAD51    | 0            | 0      | 0            | 0        | 0.613        | 0            | 0         | 0.61       | 0.839          |
| FANCA    | CDC45    | 0            | 0      | 0            | 0        | 0.738        | 0            | 0         | 0.264      | 0.794          |
| FANCA    | UBE2T    | 0            | 0      | 0            | 0        | 0.457        | 0            | 0.9       | 0.319      | 0.957          |
| FARSA    | POLR2E   | 0.253        | 0      | 0            | 0        | 0.641        | 0            | 0         | 0          | 0.714          |
| FARSA    | MRPL4    | 0            | 0      | 0            | 0        | 0.689        | 0            | 0         | 0.275      | 0.76           |
| FARSA    | MARS     | 0            | 0      | 0.222        | 0        | 0.515        | 0            | 0         | 0.81       | 0.918          |
| FARSA    | MRPS2    | 0            | 0      | 0            | 0        | 0.603        | 0            | 0         | 0.364      | 0.731          |

| Node1   | Node2     | Neighborhood | Fusion | Cooccurrence | Homology | Coexpression | Experimental | Knowledge | Textmining | Combined_score |
|---------|-----------|--------------|--------|--------------|----------|--------------|--------------|-----------|------------|----------------|
| GTPBP4  | DIMT1L    | 0            | 0      | 0            | 0        | 0.751        | 0            | 0         | 0.102      | 0.761          |
| GTPBP4  | NIP7      | 0            | 0      | 0            | 0        | 0.829        | 0.66         | 0         | 0.144      | 0.943          |
| GTPBP4  | BYSL      | 0            | 0      | 0            | 0        | 0.795        | 0            | 0         | 0          | 0.795          |
| GTPBP4  | POLR1B    | 0            | 0      | 0            | 0        | 0.704        | 0            | 0         | 0          | 0.704          |
| GTPBP4  | PNO1      | 0            | 0      | 0            | 0        | 0.838        | 0            | 0         | 0          | 0.839          |
| H2AFX   | RAD51     | 0            | 0      | 0            | 0        | 0.285        | 0.846        | 0         | 0.752      | 0.969          |
| H2AFX   | AURKB     | 0            | 0      | 0            | 0        | 0.597        | 0            | 0         | 0.341      | 0.716          |
| H2AFX   | HIST2H2BE | 0            | 0      | 0            | 0        | 0            | 0.834        | 0         | 0          | 0.834          |
| H2AFX   | EXO1      | 0            | 0      | 0            | 0        | 0.366        | 0.619        | 0         | 0.376      | 0.828          |
| HCFC1   | MLL5      | 0            | 0      | 0            | 0        | 0            | 0.067        | 0.9       | 0          | 0.9            |
| HELLS   | CDC6      | 0            | 0      | 0            | 0        | 0.833        | 0            | 0         | 0.138      | 0.846          |
| HIPK2   | MT2A      | 0            | 0      | 0            | 0        | 0            | 0            | 0         | 0.818      | 0.818          |
| HNRNPAB | TP63      | 0            | 0      | 0            | 0        | 0            | 0.789        | 0         | 0.146      | 0.807          |
| HSP90B1 | LRP1      | 0            | 0      | 0            | 0        | 0            | 0.621        | 0         | 0.907      | 0.962          |
| IARS    | YARS      | 0            | 0      | 0            | 0        | 0.729        | 0            | 0         | 0.858      | 0.959          |
| IARS    | MARS      | 0            | 0      | 0.419        | 0        | 0.763        | 0.418        | 0.9       | 0.925      | 0.999          |
| IARS    | FARSA     | 0            | 0      | 0            | 0        | 0.488        | 0.538        | 0         | 0.784      | 0.942          |
| IARS    | SHMT2     | 0            | 0      | 0            | 0        | 0.313        | 0            | 0         | 0.646      | 0.741          |
| IARS    | RPL11     | 0.224        | 0      | 0            | 0        | 0.584        | 0            | 0         | 0.192      | 0.703          |
| IARS    | BRIX1     | 0            | 0      | 0            | 0        | 0.741        | 0            | 0         | 0          | 0.741          |
| IARS    | ASNS      | 0            | 0      | 0            | 0        | 0.718        | 0            | 0         | 0.12       | 0.735          |
| ID1     | CEBPB     | 0            | 0      | 0            | 0        | 0            | 0            | 0.9       | 0.122      | 0.906          |
| ID1     | NOTCH1    | 0            | 0      | 0            | 0        | 0            | 0            | 0         | 0.841      | 0.841          |
| IFI27   | EGR1      | 0            | 0      | 0            | 0        | 0            | 0            | 0.9       | 0.068      | 0.9            |
| IFI6    | IFI27     | 0            | 0      | 0            | 0.884    | 0.824        | 0            | 0.9       | 0.8        | 0.982          |
| IFI6    | EGR1      | 0            | 0      | 0            | 0        | 0            | 0            | 0.9       | 0          | 0.899          |
| IKBKE   | TANK      | 0            | 0      | 0            | 0        | 0            | 0.975        | 0.9       | 0.902      | 0.999          |
| ILF2    | MCM5      | 0            | 0      | 0            | 0        | 0.413        | 0.8          | 0         | 0.125      | 0.883          |
| ILF2    | RUVBL1    | 0            | 0      | 0            | 0        | 0.588        | 0.8          | 0         | 0          | 0.912          |
| ILF2    | SNRPD1    | 0            | 0      | 0            | 0        | 0.757        | 0            | 0         | 0          | 0.757          |
| ILF2    | C1QB      | 0            | 0      | 0            | 0        | 0.74         | 0            | 0         | 0          | 0.74           |
| ILF2    | MCM6      | 0            | 0      | 0            | 0        | 0.404        | 0.8          | 0         | 0          | 0.872          |
| ILF2    | SHMT2     | 0            | 0      | 0            | 0        | 0.269        | 0.8          | 0         | 0.082      | 0.847          |
| IMPDH1  | PPAT      | 0.205        | 0      | 0            | 0        | 0.236        | 0            | 0         | 0.631      | 0.745          |
| IRF6    | EGR1      | 0            | 0      | 0            | 0        | 0            | 0            | 0.9       | 0          | 0.899          |
| IRF6    | IFI6      | 0            | 0      | 0            | 0        | 0            | 0            | 0.9       | 0          | 0.899          |
| IRF6    | FOS       | 0            | 0      | 0            | 0        | 0            | 0            | 0         | 0.833      | 0.833          |
| IRF6    | IFI27     | 0            | 0      | 0            | 0        | 0            | 0            | 0.9       | 0          | 0.899          |
| IRF6    | PTAFR     | 0            | 0      | 0            | 0        | 0            | 0            | 0.9       | 0.085      | 0.902          |
| IscS    | FDX1      | 0.612        | 0      | 0            | 0        | 0.18         | 0.282        | 0         | 0.805      | 0.946          |
| ISG15   | IFI27     | 0            | 0      | 0            | 0        | 0.871        | 0            | 0.9       | 0.43       | 0.991          |
| ISG15   | IRF6      | 0            | 0      | 0            | 0        | 0            | 0            | 0.9       | 0.133      | 0.907          |
| ISG15   | GBP2      | 0            | 0      | 0            | 0        | 0.107        | 0            | 0.9       | 0.374      | 0.936          |
| ISG15   | EGR1      | 0            | 0      | 0            | 0        | 0            | 0            | 0.9       | 0.086      | 0.902          |
| ISG15   | GBP1      | 0            | 0      | 0            | 0        | 0.448        | 0            | 0         | 0.507      | 0.71           |
| ISG15   | IFI6      | 0            | 0      | 0            | 0        | 0.915        | 0            | 0.9       | 0.43       | 0.994          |
| ITGA10  | ITGAV     | 0            | 0      | 0            | 0.677    | 0            | 0            | 0.72      | 0.175      | 0.73           |
| ITGA10  | CSK       | 0            | 0      | 0            | 0        | 0            | 0            | 0.8       | 0          | 0.8            |
| ITGA10  | TNC       | 0            | 0      | 0            | 0        | 0            | 0            | 0.8       | 0          | 0.8            |
| ITGAV   | MMP2      | 0            | 0      | 0            | 0        | 0            | 0.846        | 0         | 0.427      | 0.906          |
| ITGAV   | CSK       | 0            | 0      | 0            | 0        | 0            | 0            | 0.8       | 0          | 0.8            |
| JUP     | DSC2      | 0            | 0      | 0            | 0        | 0            | 0.621        | 0         | 0.67       | 0.866          |
| JUP     | SOX4      | 0            | 0      | 0            | 0        | 0            | 0            | 0         | 0.802      | 0.802          |
| JUP     | PIK3R1    | 0            | 0      | 0            | 0        | 0            | 0            | 0.9       | 0          | 0.899          |
| JUP     | CDH1      | 0            | 0      | 0            | 0        | 0.109        | 0.995        | 0.72      | 0.954      | 0.999          |
| JUP     | DSG3      | 0            | 0      | 0            | 0        | 0            | 0.621        | 0         | 0.751      | 0.899          |
| KIF2C   | CDC45     | 0            | 0      | 0            | 0        | 0.892        | 0            | 0         | 0.241      | 0.912          |
| KIF2C   | RAD51     | 0            | 0      | 0            | 0        | 0.793        | 0            | 0         | 0          | 0.793          |
| KIF2C   | AURKB     | 0            | 0      | 0            | 0        | 0.859        | 0            | 0.9       | 0.93       | 0.998          |
| KIF2C   | RNASEH2A  | 0            | 0      | 0            | 0        | 0.72         | 0            | 0         | 0          | 0.72           |
| KIF2C   | UBE2T     | 0            | 0      | 0            | 0        | 0.798        | 0            | 0         | 0          | 0.798          |
| KIF2C   | TRIP13    | 0            | 0      | 0            | 0        | 0.842        | 0            | 0         | 0.268      | 0.876          |
| KIF2C   | NUF2      | 0            | 0      | 0            | 0        | 0.741        | 0            | 0.9       | 0.38       | 0.981          |
| KIF2C   | NCAPH     | 0            | 0      | 0            | 0        | 0.82         | 0            | 0         | 0.288      | 0.863          |
| KIF2C   | CENPM     | 0            | 0      | 0            | 0        | 0.748        | 0            | 0.9       | 0          | 0.973          |
| KIF2C   | RRM2      | 0            | 0      | 0            | 0        | 0.863        | 0            | 0         | 0.216      | 0.885          |
| KIF2C   | GINS2     | 0            | 0      | 0            | 0        | 0.791        | 0            | 0         | 0.169      | 0.815          |
| KIF2C   | CDC45     | 0            | 0      | 0            | 0        | 0.903        | 0            | 0         | 0.118      | 0.909          |
| KIF2C   | PLK1      | 0            | 0      | 0            | 0        | 0.833        | 0            | 0.9       | 0.877      | 0.997          |
| KIF2C   | EXO1      | 0            | 0      | 0            | 0        | 0.836        | 0            | 0         | 0          | 0.836          |
| KIF2C   | NUDC      | 0            | 0      | 0            | 0        | 0.114        | 0            | 0.9       | 0          | 0.905          |
| KIF2C   | DTL       | 0            | 0      | 0            | 0        | 0.818        | 0            | 0         | 0.108      | 0.827          |
| KIF2C   | CENPK     | 0            | 0      | 0            | 0        | 0.512        | 0            | 0.9       | 0.309      | 0.961          |
| KIF2C   | MCM10     | 0            | 0      | 0            | 0        | 0.837        | 0            | 0         | 0.22       | 0.864          |
| KIF2C   | CDC6      | 0            | 0      | 0            | 0        | 0.79         | 0            | 0         | 0.244      | 0.831          |
| KPNA2   | RRM2      | 0            | 0      | 0            | 0        | 0.721        | 0            | 0         | 0.216      | 0.766          |
| KRT6A   | KRT17     | 0            | 0      | 0            | 0.813    | 0.295        | 0.538        | 0         | 0.79       | 0.702          |
| LCN2    | MMP2      | 0            | 0      | 0            | 0        | 0            | 0.621        | 0         | 0.341      | 0.733          |
| LRPAP1  | SORT1     | 0            | 0      | 0            | 0        | 0            | 0.846        | 0         | 0          | 0.846          |
| LRPAP1  | LRP1      | 0            | 0      | 0            | 0        | 0            | 0.983        | 0         | 0.427      | 0.989          |
| LYAR    | NIP7      | 0            | 0      | 0            | 0        | 0.71         | 0            | 0         | 0.127      | 0.73           |
| LYAR    | BRIX1     | 0            | 0      | 0            | 0        | 0.83         | 0.175        | 0         | 0.201      | 0.872          |
| MAFB    | FOS       | 0            | 0      | 0            | 0        | 0            | 0.096        | 0         | 0.867      | 0.872          |
| MAK16   | BRIX1     | 0            | 0      | 0            | 0        | 0.869        | 0            | 0         | 0          | 0.869          |
| MAK16   | NIP7      | 0            | 0      | 0            | 0        | 0.85         | 0            | 0         | 0          | 0.85           |
| MAK16   | BYSL      | 0            | 0      | 0            | 0        | 0.814        | 0            | 0         | 0.105      | 0.822          |

| Node1   | Node2    | Neighborhood | Fusion | Cooccurrence | Homology | Coexpression | Experimental | Knowledge | Textmining | Combined score |
|---------|----------|--------------|--------|--------------|----------|--------------|--------------|-----------|------------|----------------|
| MAK16   | TBL3     | 0            | 0      | 0            | 0        | 0.71         | 0            | 0         | 0          | 0.71           |
| MAK16   | NAT10    | 0            | 0      | 0            | 0        | 0.801        | 0            | 0         | 0.31       | 0.854          |
| MAK16   | EMG1     | 0            | 0      | 0            | 0        | 0.776        | 0            | 0         | 0.113      | 0.788          |
| MAK16   | DIMT1L   | 0            | 0      | 0            | 0        | 0.818        | 0            | 0         | 0.181      | 0.841          |
| MAK16   | PNO1     | 0            | 0      | 0            | 0        | 0.889        | 0            | 0         | 0.228      | 0.909          |
| MAOA    | ALDH3A1  | 0            | 0      | 0            | 0        | 0            | 0            | 0.9       | 0.072      | 0.9            |
| MAOA    | ALDH3B1  | 0            | 0      | 0            | 0        | 0            | 0            | 0.9       | 0.068      | 0.9            |
| MARCKS  | RIPK4    | 0            | 0      | 0            | 0        | 0            | 0            | 0         | 0.859      | 0.859          |
| MARS    | DIMT1L   | 0.172        | 0      | 0            | 0        | 0.308        | 0            | 0         | 0.627      | 0.756          |
| MCL1    | E2F1     | 0            | 0      | 0            | 0        | 0            | 0            | 0.9       | 0          | 0.899          |
| MCL1    | ELF3     | 0            | 0      | 0            | 0        | 0            | 0            | 0         | 0.751      | 0.75           |
| MCL1    | LRPAP1   | 0            | 0      | 0            | 0        | 0            | 0            | 0         | 0.864      | 0.864          |
| MCM10   | CENPK    | 0            | 0      | 0            | 0        | 0.707        | 0            | 0         | 0.202      | 0.75           |
| MCM10   | GIN52    | 0            | 0      | 0            | 0        | 0.728        | 0            | 0         | 0.064      | 0.729          |
| MCM10   | HELLS    | 0            | 0      | 0            | 0        | 0.755        | 0            | 0         | 0.133      | 0.773          |
| MCM10   | MCM5     | 0            | 0      | 0            | 0        | 0.548        | 0            | 0.9       | 0.54       | 0.976          |
| MCM10   | CDC45    | 0            | 0      | 0            | 0        | 0.907        | 0.923        | 0.9       | 0.807      | 0.999          |
| MCM10   | SIRT2    | 0            | 0      | 0            | 0        | 0            | 0            | 0         | 0.817      | 0.817          |
| MCM10   | RAD51    | 0            | 0      | 0            | 0        | 0.807        | 0            | 0         | 0.112      | 0.817          |
| MCM10   | CDC45    | 0            | 0      | 0            | 0        | 0.794        | 0            | 0         | 0.2        | 0.825          |
| MCM10   | MCM6     | 0            | 0      | 0            | 0        | 0.655        | 0.974        | 0.9       | 0.675      | 0.999          |
| MCM10   | CDC6     | 0            | 0      | 0            | 0        | 0.86         | 0.917        | 0.9       | 0.562      | 0.999          |
| MCM10   | TRIP13   | 0            | 0      | 0            | 0        | 0.721        | 0            | 0         | 0.147      | 0.746          |
| MCM10   | EXO1     | 0            | 0      | 0            | 0        | 0.871        | 0            | 0         | 0          | 0.871          |
| MCM10   | NCAPH    | 0            | 0      | 0            | 0        | 0.756        | 0            | 0         | 0.126      | 0.773          |
| MCM10   | NUF2     | 0            | 0      | 0            | 0        | 0.783        | 0            | 0         | 0.183      | 0.81           |
| MCM10   | CCND2    | 0            | 0      | 0            | 0        | 0            | 0.925        | 0         | 0          | 0.925          |
| MCM10   | ATRIP    | 0            | 0      | 0            | 0        | 0            | 0            | 0.9       | 0.331      | 0.928          |
| MCM10   | RRM2     | 0            | 0      | 0            | 0        | 0.793        | 0            | 0         | 0.157      | 0.814          |
| MCM5    | CDC6     | 0            | 0      | 0            | 0        | 0.743        | 0.098        | 0.9       | 0.7        | 0.991          |
| MCM5    | CENPM    | 0            | 0      | 0            | 0        | 0.745        | 0            | 0         | 0          | 0.745          |
| MCM5    | TRIP13   | 0            | 0      | 0            | 0        | 0.752        | 0            | 0         | 0.161      | 0.778          |
| MCM6    | GIN52    | 0            | 0      | 0            | 0        | 0.826        | 0.379        | 0.9       | 0.107      | 0.988          |
| MCM6    | CENPK    | 0            | 0      | 0            | 0        | 0.702        | 0            | 0         | 0          | 0.702          |
| MCM6    | CDC45    | 0            | 0      | 0            | 0        | 0.893        | 0.987        | 0.9       | 0.66       | 0.999          |
| MCM6    | TRIP13   | 0            | 0      | 0            | 0        | 0.802        | 0            | 0         | 0.167      | 0.824          |
| MCM6    | HELLS    | 0            | 0      | 0            | 0        | 0.748        | 0            | 0         | 0.104      | 0.759          |
| MCM6    | RNASEH2A | 0            | 0      | 0            | 0        | 0.686        | 0            | 0         | 0.183      | 0.726          |
| MCM6    | CDC6     | 0            | 0      | 0            | 0        | 0.863        | 0.127        | 0.9       | 0.585      | 0.994          |
| MCM6    | MCM5     | 0            | 0      | 0.52         | 0.822    | 0.817        | 0.928        | 0.9       | 0.752      | 0.998          |
| MED24   | CEBPB    | 0            | 0      | 0            | 0        | 0            | 0            | 0.9       | 0          | 0.899          |
| MED24   | MED8     | 0            | 0      | 0            | 0        | 0            | 0            | 0.9       | 0.22       | 0.916          |
| MED24   | CDK4     | 0            | 0      | 0            | 0        | 0            | 0            | 0.9       | 0          | 0.899          |
| MED24   | ANGPTL4  | 0            | 0      | 0            | 0        | 0            | 0            | 0.9       | 0          | 0.899          |
| MED8    | CDK4     | 0            | 0      | 0            | 0        | 0            | 0            | 0.9       | 0          | 0.899          |
| MMP2    | CD9      | 0            | 0      | 0            | 0        | 0            | 0            | 0         | 0.835      | 0.835          |
| MRPL12  | MRPL4    | 0.58         | 0      | 0            | 0        | 0.793        | 0.604        | 0         | 0.799      | 0.991          |
| MRPL12  | SHMT2    | 0            | 0      | 0            | 0        | 0.368        | 0            | 0         | 0.555      | 0.7            |
| MRPL12  | MRPS2    | 0            | 0      | 0            | 0        | 0.658        | 0.227        | 0         | 0.829      | 0.948          |
| MRPL4   | MRPS2    | 0.147        | 0      | 0            | 0        | 0.666        | 0.079        | 0         | 0.8        | 0.936          |
| MTHFD2  | SHMT2    | 0.386        | 0      | 0            | 0        | 0.372        | 0            | 0.9       | 0.832      | 0.992          |
| MTHFD2  | PFAS     | 0            | 0      | 0            | 0        | 0.156        | 0            | 0         | 0.861      | 0.874          |
| MTHFD2  | IARS     | 0            | 0      | 0            | 0        | 0.594        | 0            | 0         | 0.431      | 0.753          |
| MTHFD2  | ASNS     | 0            | 0      | 0            | 0        | 0.641        | 0            | 0         | 0.434      | 0.783          |
| MYBBP1A | BOP1     | 0            | 0      | 0            | 0        | 0.406        | 0.62         | 0         | 0          | 0.759          |
| MYBBP1A | LYAR     | 0            | 0      | 0            | 0        | 0.416        | 0.663        | 0         | 0          | 0.79           |
| MYBL2   | CDC6     | 0            | 0      | 0            | 0        | 0.687        | 0            | 0         | 0.34       | 0.779          |
| MYC     | ELF3     | 0            | 0      | 0            | 0        | 0            | 0.621        | 0         | 0.283      | 0.709          |
| MYC     | CLU      | 0            | 0      | 0            | 0        | 0            | 0            | 0.9       | 0.149      | 0.909          |
| MYC     | CCND3    | 0            | 0      | 0            | 0        | 0            | 0            | 0         | 0.886      | 0.886          |
| MYC     | RPL11    | 0            | 0      | 0            | 0        | 0            | 0.621        | 0.9       | 0.821      | 0.992          |
| MYC     | FOSL1    | 0            | 0      | 0            | 0        | 0            | 0.17         | 0.9       | 0.341      | 0.937          |
| MYC     | NDUFAF2  | 0            | 0      | 0            | 0        | 0            | 0            | 0.9       | 0.828      | 0.981          |
| MYC     | LRIG1    | 0            | 0      | 0            | 0        | 0            | 0            | 0         | 0.809      | 0.809          |
| MYC     | PFKM     | 0            | 0      | 0            | 0        | 0            | 0            | 0.9       | 0.164      | 0.91           |
| MYC     | RCC1     | 0            | 0      | 0            | 0        | 0            | 0            | 0.9       | 0.854      | 0.984          |
| MYC     | CDC6     | 0            | 0      | 0            | 0        | 0            | 0.621        | 0         | 0.332      | 0.729          |
| MYC     | CCND2    | 0            | 0      | 0            | 0        | 0            | 0            | 0.9       | 0.902      | 0.989          |
| MYC     | E2F1     | 0            | 0      | 0            | 0        | 0            | 0            | 0.9       | 0.877      | 0.986          |
| MYC     | CDK4     | 0            | 0      | 0            | 0        | 0            | 0.627        | 0.9       | 0.924      | 0.996          |
| MYC     | NOTCH1   | 0            | 0      | 0            | 0        | 0            | 0            | 0.9       | 0.541      | 0.951          |
| MYC     | FOS      | 0            | 0      | 0            | 0        | 0            | 0            | 0         | 0.946      | 0.946          |
| MYC     | NDRG1    | 0            | 0      | 0            | 0        | 0            | 0            | 0.9       | 0.833      | 0.982          |
| MYC     | CSF3     | 0            | 0      | 0            | 0        | 0            | 0            | 0         | 0.847      | 0.847          |
| MYC     | CEBPB    | 0            | 0      | 0            | 0        | 0            | 0.666        | 0         | 0.204      | 0.717          |
| MYC     | RUVBL1   | 0            | 0      | 0            | 0        | 0            | 0.861        | 0.9       | 0.162      | 0.986          |
| MYC     | GAS1     | 0            | 0      | 0            | 0        | 0            | 0            | 0         | 0.835      | 0.835          |
| MYC     | JUND     | 0            | 0      | 0            | 0        | 0            | 0            | 0.9       | 0.244      | 0.919          |
| MYLK    | TPM1     | 0            | 0      | 0            | 0        | 0.159        | 0            | 0.9       | 0.612      | 0.962          |
| MYLK    | MYL9     | 0            | 0      | 0            | 0        | 0.397        | 0            | 0.8       | 0.874      | 0.982          |
| MYLK    | AURKB    | 0            | 0      | 0            | 0.81     | 0            | 0            | 0.9       | 0.117      | 0.901          |
| MYLK    | PAK4     | 0            | 0      | 0            | 0.622    | 0            | 0            | 0.8       | 0.211      | 0.811          |
| NAT10   | NIP7     | 0            | 0      | 0            | 0        | 0.79         | 0            | 0         | 0          | 0.79           |
| NAT10   | BYSL     | 0            | 0      | 0            | 0        | 0.823        | 0.597        | 0         | 0.433      | 0.954          |
| NAT10   | DIMT1L   | 0            | 0      | 0            | 0        | 0.717        | 0            | 0         | 0.119      | 0.734          |
| NCAPD3  | NCAPH    | 0            | 0      | 0            | 0        | 0.479        | 0            | 0.9       | 0.221      | 0.953          |



| Node1   | Node2   | Neighborhood | Fusion | Cooccurrence | Homology | Coexpression | Experimental | Knowledge | Textmining | Combined score |
|---------|---------|--------------|--------|--------------|----------|--------------|--------------|-----------|------------|----------------|
| NCAPH   | CDC6    | 0            | 0      | 0            | 0        | 0.895        | 0            | 0         | 0.145      | 0.904          |
| NCAPH   | TRIP13  | 0            | 0      | 0            | 0        | 0.821        | 0            | 0         | 0.114      | 0.831          |
| NCAPH   | CENPM   | 0            | 0      | 0            | 0        | 0.863        | 0            | 0         | 0          | 0.863          |
| NCAPH   | HELLS   | 0            | 0      | 0            | 0        | 0.645        | 0            | 0         | 0.27       | 0.724          |
| NDRG1   | EGR1    | 0            | 0      | 0            | 0        | 0            | 0            | 0         | 0.833      | 0.833          |
| NDRG1   | ODC1    | 0            | 0      | 0            | 0        | 0            | 0            | 0         | 0.8        | 0.8            |
| NEDD4L  | UBE2S   | 0            | 0      | 0            | 0        | 0            | 0            | 0         | 0.751      | 0.75           |
| NEDD4L  | SCNN1G  | 0            | 0      | 0            | 0        | 0            | 0.995        | 0.8       | 0.676      | 0.999          |
| NGFRAP1 | NGFR    | 0            | 0      | 0            | 0        | 0            | 0.834        | 0.9       | 0.534      | 0.991          |
| NGFRAP1 | SORT1   | 0            | 0      | 0            | 0        | 0            | 0            | 0.9       | 0          | 0.899          |
| NIP7    | BYSL    | 0            | 0      | 0            | 0        | 0.846        | 0            | 0         | 0.106      | 0.853          |
| NIP7    | POLR2E  | 0            | 0      | 0            | 0        | 0.788        | 0            | 0         | 0.133      | 0.804          |
| NIP7    | DIMT1L  | 0            | 0      | 0            | 0        | 0.863        | 0            | 0         | 0.217      | 0.885          |
| NLE1    | GTPBP4  | 0            | 0      | 0            | 0        | 0.724        | 0.48         | 0         | 0          | 0.847          |
| NLE1    | NAT10   | 0            | 0      | 0            | 0        | 0.708        | 0            | 0         | 0.2        | 0.751          |
| NLE1    | NIP7    | 0            | 0      | 0            | 0        | 0.721        | 0            | 0         | 0          | 0.721          |
| NLE1    | BYSL    | 0            | 0      | 0            | 0        | 0.774        | 0            | 0         | 0          | 0.774          |
| NLE1    | PNO1    | 0            | 0      | 0            | 0        | 0.721        | 0            | 0         | 0.329      | 0.8            |
| NLE1    | ZNF593  | 0            | 0      | 0            | 0        | 0.535        | 0.348        | 0         | 0.139      | 0.703          |
| NLE1    | TBL3    | 0            | 0      | 0.476        | 0.674    | 0.689        | 0.288        | 0         | 0.148      | 0.804          |
| NLE1    | RPF2    | 0            | 0      | 0            | 0        | 0.658        | 0            | 0         | 0.184      | 0.702          |
| NLE1    | NOP2    | 0            | 0      | 0            | 0        | 0.698        | 0            | 0         | 0.168      | 0.732          |
| NOC4L   | BYSL    | 0            | 0      | 0            | 0        | 0.743        | 0.405        | 0         | 0.293      | 0.877          |
| NOC4L   | NIP7    | 0            | 0      | 0            | 0        | 0.742        | 0            | 0         | 0          | 0.742          |
| NOC4L   | EMG1    | 0            | 0      | 0            | 0        | 0.6          | 0.45         | 0         | 0.198      | 0.799          |
| NOC4L   | PNO1    | 0            | 0      | 0            | 0        | 0.644        | 0.257        | 0         | 0.248      | 0.774          |
| NOC4L   | NAT10   | 0            | 0      | 0            | 0        | 0.699        | 0.458        | 0         | 0.332      | 0.876          |
| NOC4L   | DIMT1L  | 0            | 0      | 0            | 0        | 0.629        | 0.451        | 0         | 0          | 0.783          |
| NOLC1   | CEBPB   | 0            | 0      | 0            | 0        | 0            | 0.872        | 0         | 0          | 0.873          |
| NOLC1   | SNRPD1  | 0            | 0      | 0            | 0        | 0.4          | 0            | 0         | 0.553      | 0.713          |
| NOP2    | NAT10   | 0            | 0      | 0            | 0        | 0.851        | 0            | 0         | 0.105      | 0.858          |
| NOP2    | DIMT1L  | 0            | 0      | 0            | 0        | 0.76         | 0            | 0         | 0.37       | 0.839          |
| NOP2    | POLR1B  | 0            | 0      | 0            | 0        | 0.757        | 0            | 0         | 0          | 0.757          |
| NOP2    | MAK16   | 0            | 0      | 0            | 0        | 0.809        | 0            | 0         | 0.176      | 0.832          |
| NOP2    | NIP7    | 0            | 0      | 0            | 0        | 0.809        | 0.591        | 0         | 0.562      | 0.961          |
| NOP2    | NOP56   | 0            | 0      | 0            | 0        | 0.835        | 0.317        | 0         | 0.109      | 0.886          |
| NOP2    | BRIX1   | 0            | 0      | 0            | 0        | 0.805        | 0.544        | 0         | 0          | 0.905          |
| NOP2    | EMG1    | 0            | 0      | 0            | 0        | 0.795        | 0            | 0         | 0          | 0.795          |
| NOP2    | NOC4L   | 0            | 0      | 0            | 0        | 0.74         | 0            | 0         | 0.093      | 0.748          |
| NOP2    | DDX56   | 0            | 0      | 0            | 0        | 0.657        | 0.275        | 0         | 0.121      | 0.751          |
| NOP2    | BOP1    | 0            | 0      | 0            | 0        | 0.754        | 0.298        | 0         | 0.182      | 0.839          |
| NOP2    | WDR74   | 0            | 0      | 0            | 0        | 0.727        | 0            | 0         | 0          | 0.727          |
| NOP2    | MYBBP1A | 0            | 0      | 0            | 0        | 0.679        | 0.62         | 0         | 0.102      | 0.875          |
| NOP2    | EIF3B   | 0            | 0      | 0            | 0        | 0.724        | 0            | 0         | 0          | 0.725          |
| NOP2    | PUS1    | 0            | 0      | 0            | 0        | 0.737        | 0            | 0         | 0.105      | 0.749          |
| NOP2    | BYSL    | 0            | 0      | 0            | 0        | 0.852        | 0            | 0         | 0          | 0.852          |
| NOP2    | PNO1    | 0            | 0      | 0            | 0        | 0.805        | 0            | 0         | 0.171      | 0.828          |
| NOP2    | GTPBP4  | 0            | 0      | 0            | 0        | 0.782        | 0.683        | 0         | 0.147      | 0.933          |
| NOP2    | TBL3    | 0            | 0      | 0            | 0        | 0.755        | 0            | 0         | 0          | 0.755          |
| NOP56   | BYSL    | 0            | 0      | 0            | 0        | 0.845        | 0.348        | 0         | 0.236      | 0.912          |
| NOP56   | BRIX1   | 0            | 0      | 0            | 0        | 0.834        | 0.456        | 0         | 0.121      | 0.91           |
| NOP56   | EIF3B   | 0            | 0      | 0            | 0        | 0.715        | 0            | 0         | 0.08       | 0.72           |
| NOP56   | LYAR    | 0            | 0      | 0            | 0        | 0.589        | 0.421        | 0         | 0.167      | 0.774          |
| NOP56   | EMG1    | 0            | 0      | 0            | 0        | 0.748        | 0.435        | 0         | 0.261      | 0.88           |
| NOP56   | NAT10   | 0            | 0      | 0            | 0        | 0.781        | 0.604        | 0         | 0.265      | 0.927          |
| NOP56   | PNO1    | 0            | 0      | 0            | 0        | 0.754        | 0.125        | 0         | 0.259      | 0.819          |
| NOP56   | NOC4L   | 0            | 0      | 0            | 0        | 0.558        | 0.301        | 0         | 0.18       | 0.712          |
| NOP56   | MAK16   | 0            | 0      | 0            | 0        | 0.787        | 0            | 0         | 0          | 0.788          |
| NOP56   | NOLC1   | 0            | 0      | 0            | 0        | 0.637        | 0.421        | 0         | 0.158      | 0.798          |
| NOP56   | BOP1    | 0            | 0      | 0            | 0        | 0.702        | 0.065        | 0         | 0          | 0.703          |
| NOP56   | GTPBP4  | 0            | 0      | 0            | 0        | 0.681        | 0.453        | 0         | 0.11       | 0.823          |
| NOP56   | ILF2    | 0            | 0      | 0            | 0        | 0.5          | 0.421        | 0         | 0.122      | 0.711          |
| NOP56   | NIP7    | 0            | 0      | 0            | 0        | 0.81         | 0            | 0         | 0.113      | 0.821          |
| NOP56   | POLR1B  | 0            | 0      | 0.453        | 0        | 0.678        | 0.084        | 0         | 0          | 0.816          |
| NOP56   | RPL11   | 0            | 0      | 0.209        | 0        | 0.545        | 0.421        | 0         | 0          | 0.762          |
| NOP56   | DIMT1L  | 0.192        | 0      | 0            | 0        | 0.695        | 0            | 0         | 0.17       | 0.768          |
| NOP56   | TBL3    | 0            | 0      | 0            | 0        | 0.645        | 0.332        | 0         | 0.113      | 0.761          |
| NOP56   | SOX4    | 0            | 0      | 0            | 0        | 0            | 0            | 0         | 0.866      | 0.866          |
| NOTCH1  | EFNB2   | 0            | 0      | 0            | 0        | 0            | 0            | 0         | 0.907      | 0.907          |
| NOTCH1  | CDH1    | 0            | 0      | 0            | 0        | 0            | 0            | 0         | 0.917      | 0.917          |
| NOTCH1  | SOX9    | 0            | 0      | 0            | 0        | 0            | 0            | 0         | 0.886      | 0.886          |
| NR2F2   | CEBPB   | 0            | 0      | 0            | 0        | 0            | 0            | 0.9       | 0.07       | 0.9            |
| NTF4    | NGFR    | 0            | 0      | 0            | 0        | 0            | 0.621        | 0.9       | 0.752      | 0.989          |
| NUDC    | NUF2    | 0            | 0      | 0            | 0        | 0            | 0            | 0.9       | 0          | 0.899          |
| NUDC    | CENPK   | 0            | 0      | 0            | 0        | 0            | 0            | 0.9       | 0          | 0.899          |
| NUDC    | AURKB   | 0            | 0      | 0            | 0        | 0.146        | 0            | 0.9       | 0.071      | 0.909          |
| NUDC    | PLK1    | 0            | 0      | 0            | 0        | 0            | 0.621        | 0.9       | 0.885      | 0.995          |
| NUDC    | CENPM   | 0            | 0      | 0            | 0        | 0            | 0            | 0.9       | 0          | 0.899          |
| NUF2    | CDC6    | 0            | 0      | 0            | 0        | 0.851        | 0            | 0         | 0.185      | 0.87           |
| NUF2    | RAD51   | 0            | 0      | 0            | 0        | 0.814        | 0            | 0         | 0.117      | 0.824          |
| NUF2    | CDC45   | 0            | 0      | 0            | 0        | 0.89         | 0            | 0         | 0.18       | 0.904          |
| NUF2    | CENPM   | 0            | 0      | 0            | 0        | 0.736        | 0            | 0.9       | 0          | 0.971          |
| NUF2    | MCM6    | 0            | 0      | 0            | 0        | 0.781        | 0            | 0         | 0.136      | 0.798          |
| NUF2    | TRIP13  | 0            | 0      | 0            | 0        | 0.831        | 0            | 0         | 0.236      | 0.862          |
| NUF2    | HELLS   | 0            | 0      | 0            | 0        | 0.8          | 0            | 0         | 0.145      | 0.818          |
| NUF2    | CENPK   | 0            | 0      | 0            | 0        | 0.888        | 0            | 0.9       | 0.211      | 0.989          |

| Node1   | Node2   | Neighborhood | Fusion | Cooccurrence | Homology | Coexpression | Experimental | Knowledge | Textmining | Combined score |
|---------|---------|--------------|--------|--------------|----------|--------------|--------------|-----------|------------|----------------|
| NCAPH   | CDC6    | 0            | 0      | 0            | 0        | 0.895        | 0            | 0         | 0.145      | 0.904          |
| NCAPH   | TRIP13  | 0            | 0      | 0            | 0        | 0.821        | 0            | 0         | 0.114      | 0.831          |
| NCAPH   | CENPM   | 0            | 0      | 0            | 0        | 0.863        | 0            | 0         | 0          | 0.863          |
| NCAPH   | HELLS   | 0            | 0      | 0            | 0        | 0.645        | 0            | 0         | 0.27       | 0.724          |
| NDRG1   | EGR1    | 0            | 0      | 0            | 0        | 0            | 0            | 0         | 0.833      | 0.833          |
| NDRG1   | ODC1    | 0            | 0      | 0            | 0        | 0            | 0            | 0         | 0.8        | 0.8            |
| NEDD4L  | UBE2S   | 0            | 0      | 0            | 0        | 0            | 0            | 0         | 0.751      | 0.75           |
| NEDD4L  | SCNN1G  | 0            | 0      | 0            | 0        | 0            | 0.995        | 0.8       | 0.676      | 0.999          |
| NGFRAP1 | NGFR    | 0            | 0      | 0            | 0        | 0            | 0.834        | 0.9       | 0.534      | 0.991          |
| NGFRAP1 | SORT1   | 0            | 0      | 0            | 0        | 0            | 0            | 0.9       | 0          | 0.899          |
| NIP7    | BYSL    | 0            | 0      | 0            | 0        | 0.846        | 0            | 0         | 0.106      | 0.853          |
| NIP7    | POLR2E  | 0            | 0      | 0            | 0        | 0.788        | 0            | 0         | 0.133      | 0.804          |
| NIP7    | DIMT1L  | 0            | 0      | 0            | 0        | 0.863        | 0            | 0         | 0.217      | 0.885          |
| NLE1    | GTPBP4  | 0            | 0      | 0            | 0        | 0.724        | 0.48         | 0         | 0          | 0.847          |
| NLE1    | NAT10   | 0            | 0      | 0            | 0        | 0.708        | 0            | 0         | 0.2        | 0.751          |
| NLE1    | NIP7    | 0            | 0      | 0            | 0        | 0.721        | 0            | 0         | 0          | 0.721          |
| NLE1    | BYSL    | 0            | 0      | 0            | 0        | 0.774        | 0            | 0         | 0          | 0.774          |
| NLE1    | PNO1    | 0            | 0      | 0            | 0        | 0.721        | 0            | 0         | 0.329      | 0.8            |
| NLE1    | ZNF593  | 0            | 0      | 0            | 0        | 0.535        | 0.348        | 0         | 0.139      | 0.703          |
| NLE1    | TBL3    | 0            | 0      | 0.476        | 0.674    | 0.689        | 0.288        | 0         | 0.148      | 0.804          |
| NLE1    | RPF2    | 0            | 0      | 0            | 0        | 0.658        | 0            | 0         | 0.184      | 0.702          |
| NLE1    | NOP2    | 0            | 0      | 0            | 0        | 0.698        | 0            | 0         | 0.168      | 0.732          |
| NOC4L   | BYSL    | 0            | 0      | 0            | 0        | 0.743        | 0.405        | 0         | 0.293      | 0.877          |
| NOC4L   | NIP7    | 0            | 0      | 0            | 0        | 0.742        | 0            | 0         | 0          | 0.742          |
| NOC4L   | EMG1    | 0            | 0      | 0            | 0        | 0.6          | 0.45         | 0         | 0.198      | 0.799          |
| NOC4L   | PNO1    | 0            | 0      | 0            | 0        | 0.644        | 0.257        | 0         | 0.248      | 0.774          |
| NOC4L   | NAT10   | 0            | 0      | 0            | 0        | 0.699        | 0.458        | 0         | 0.332      | 0.876          |
| NOC4L   | DIMT1L  | 0            | 0      | 0            | 0        | 0.629        | 0.451        | 0         | 0          | 0.783          |
| NOLC1   | CEBPB   | 0            | 0      | 0            | 0        | 0            | 0.872        | 0         | 0          | 0.873          |
| NOLC1   | SNRPD1  | 0            | 0      | 0            | 0        | 0.4          | 0            | 0         | 0.553      | 0.713          |
| NOP2    | NAT10   | 0            | 0      | 0            | 0        | 0.851        | 0            | 0         | 0.105      | 0.858          |
| NOP2    | DIMT1L  | 0            | 0      | 0            | 0        | 0.76         | 0            | 0         | 0.37       | 0.839          |
| NOP2    | POLR1B  | 0            | 0      | 0            | 0        | 0.757        | 0            | 0         | 0          | 0.757          |
| NOP2    | MAK16   | 0            | 0      | 0            | 0        | 0.809        | 0            | 0         | 0.176      | 0.832          |
| NOP2    | NIP7    | 0            | 0      | 0            | 0        | 0.809        | 0.591        | 0         | 0.562      | 0.961          |
| NOP2    | NOP56   | 0            | 0      | 0            | 0        | 0.835        | 0.317        | 0         | 0.109      | 0.886          |
| NOP2    | BRIX1   | 0            | 0      | 0            | 0        | 0.805        | 0.544        | 0         | 0          | 0.905          |
| NOP2    | EMG1    | 0            | 0      | 0            | 0        | 0.795        | 0            | 0         | 0          | 0.795          |
| NOP2    | NOC4L   | 0            | 0      | 0            | 0        | 0.74         | 0            | 0         | 0.093      | 0.748          |
| NOP2    | DDX56   | 0            | 0      | 0            | 0        | 0.657        | 0.275        | 0         | 0.121      | 0.751          |
| NOP2    | BOP1    | 0            | 0      | 0            | 0        | 0.754        | 0.298        | 0         | 0.182      | 0.839          |
| NOP2    | WDR74   | 0            | 0      | 0            | 0        | 0.727        | 0            | 0         | 0          | 0.727          |
| NOP2    | MYBBP1A | 0            | 0      | 0            | 0        | 0.679        | 0.62         | 0         | 0.102      | 0.875          |
| NOP2    | EIF3B   | 0            | 0      | 0            | 0        | 0.724        | 0            | 0         | 0          | 0.725          |
| NOP2    | PUS1    | 0            | 0      | 0            | 0        | 0.737        | 0            | 0         | 0.105      | 0.749          |
| NOP2    | BYSL    | 0            | 0      | 0            | 0        | 0.852        | 0            | 0         | 0          | 0.852          |
| NOP2    | PNO1    | 0            | 0      | 0            | 0        | 0.805        | 0            | 0         | 0.171      | 0.828          |
| NOP2    | GTPBP4  | 0            | 0      | 0            | 0        | 0.782        | 0.683        | 0         | 0.147      | 0.933          |
| NOP2    | TBL3    | 0            | 0      | 0            | 0        | 0.755        | 0            | 0         | 0          | 0.755          |
| NOP56   | BYSL    | 0            | 0      | 0            | 0        | 0.845        | 0.348        | 0         | 0.236      | 0.912          |
| NOP56   | BRIX1   | 0            | 0      | 0            | 0        | 0.834        | 0.456        | 0         | 0.121      | 0.91           |
| NOP56   | EIF3B   | 0            | 0      | 0            | 0        | 0.715        | 0            | 0         | 0.08       | 0.72           |
| NOP56   | LYAR    | 0            | 0      | 0            | 0        | 0.589        | 0.421        | 0         | 0.167      | 0.774          |
| NOP56   | EMG1    | 0            | 0      | 0            | 0        | 0.748        | 0.435        | 0         | 0.261      | 0.88           |
| NOP56   | NAT10   | 0            | 0      | 0            | 0        | 0.781        | 0.604        | 0         | 0.265      | 0.927          |
| NOP56   | PNO1    | 0            | 0      | 0            | 0        | 0.754        | 0.125        | 0         | 0.259      | 0.819          |
| NOP56   | NOC4L   | 0            | 0      | 0            | 0        | 0.558        | 0.301        | 0         | 0.18       | 0.712          |
| NOP56   | MAK16   | 0            | 0      | 0            | 0        | 0.787        | 0            | 0         | 0          | 0.788          |
| NOP56   | NOLC1   | 0            | 0      | 0            | 0        | 0.637        | 0.421        | 0         | 0.158      | 0.798          |
| NOP56   | BOP1    | 0            | 0      | 0            | 0        | 0.702        | 0.065        | 0         | 0          | 0.703          |
| NOP56   | GTPBP4  | 0            | 0      | 0            | 0        | 0.681        | 0.453        | 0         | 0.11       | 0.823          |
| NOP56   | ILF2    | 0            | 0      | 0            | 0        | 0.5          | 0.421        | 0         | 0.122      | 0.711          |
| NOP56   | NIP7    | 0            | 0      | 0            | 0        | 0.81         | 0            | 0         | 0.113      | 0.821          |
| NOP56   | POLR1B  | 0            | 0      | 0.453        | 0        | 0.678        | 0.084        | 0         | 0          | 0.816          |
| NOP56   | RPL11   | 0            | 0      | 0.209        | 0        | 0.545        | 0.421        | 0         | 0          | 0.762          |
| NOP56   | DIMT1L  | 0.192        | 0      | 0            | 0        | 0.695        | 0            | 0         | 0.17       | 0.768          |
| NOP56   | TBL3    | 0            | 0      | 0            | 0        | 0.645        | 0.332        | 0         | 0.113      | 0.761          |
| NOP56   | SOX4    | 0            | 0      | 0            | 0        | 0            | 0            | 0         | 0.866      | 0.866          |
| NOTCH1  | EFNB2   | 0            | 0      | 0            | 0        | 0            | 0            | 0         | 0.907      | 0.907          |
| NOTCH1  | CDH1    | 0            | 0      | 0            | 0        | 0            | 0            | 0         | 0.917      | 0.917          |
| NOTCH1  | SOX9    | 0            | 0      | 0            | 0        | 0            | 0            | 0         | 0.886      | 0.886          |
| NR2F2   | CEBPB   | 0            | 0      | 0            | 0        | 0            | 0            | 0.9       | 0.07       | 0.9            |
| NTF4    | NGFR    | 0            | 0      | 0            | 0        | 0            | 0.621        | 0.9       | 0.752      | 0.989          |
| NUDC    | NUF2    | 0            | 0      | 0            | 0        | 0            | 0            | 0.9       | 0          | 0.899          |
| NUDC    | CENPK   | 0            | 0      | 0            | 0        | 0            | 0            | 0.9       | 0          | 0.899          |
| NUDC    | AURKB   | 0            | 0      | 0            | 0        | 0.146        | 0            | 0.9       | 0.071      | 0.909          |
| NUDC    | PLK1    | 0            | 0      | 0            | 0        | 0            | 0.621        | 0.9       | 0.885      | 0.995          |
| NUDC    | CENPM   | 0            | 0      | 0            | 0        | 0            | 0            | 0.9       | 0          | 0.899          |
| NUF2    | CDC6    | 0            | 0      | 0            | 0        | 0.851        | 0            | 0         | 0.185      | 0.87           |
| NUF2    | RAD51   | 0            | 0      | 0            | 0        | 0.814        | 0            | 0         | 0.117      | 0.824          |
| NUF2    | CDC45   | 0            | 0      | 0            | 0        | 0.89         | 0            | 0         | 0.18       | 0.904          |
| NUF2    | CENPM   | 0            | 0      | 0            | 0        | 0.736        | 0            | 0.9       | 0          | 0.971          |
| NUF2    | MCM6    | 0            | 0      | 0            | 0        | 0.781        | 0            | 0         | 0.136      | 0.798          |
| NUF2    | TRIP13  | 0            | 0      | 0            | 0        | 0.831        | 0            | 0         | 0.236      | 0.862          |
| NUF2    | HELLS   | 0            | 0      | 0            | 0        | 0.8          | 0            | 0         | 0.145      | 0.818          |
| NUF2    | CENPK   | 0            | 0      | 0            | 0        | 0.888        | 0            | 0.9       | 0.211      | 0.989          |



| Node1  | Node2   | Neighborhood | Fusion | Cooccurrence | Homology | Coexpression | Experimental | Knowledge | Textmining | Combined score |
|--------|---------|--------------|--------|--------------|----------|--------------|--------------|-----------|------------|----------------|
| NUF2   | NCAPH   | 0            | 0      | 0            | 0        | 0.85         | 0            | 0         | 0.113      | 0.858          |
| NUP155 | NUP88   | 0            | 0      | 0            | 0        | 0.22         | 0            | 0.9       | 0.336      | 0.941          |
| NUP155 | TRIP13  | 0            | 0      | 0            | 0        | 0.786        | 0            | 0         | 0          | 0.787          |
| NUP93  | GEMIN5  | 0            | 0      | 0            | 0        | 0.156        | 0            | 0.9       | 0          | 0.909          |
| NUP93  | NUP155  | 0            | 0      | 0            | 0        | 0.417        | 0            | 0.9       | 0.75       | 0.983          |
| NUP93  | NUP88   | 0            | 0      | 0            | 0        | 0.239        | 0            | 0.9       | 0.504      | 0.957          |
| OCLN   | CSNK2A1 | 0            | 0      | 0            | 0        | 0            | 0            | 0.8       | 0          | 0.8            |
| OCLN   | CDH1    | 0            | 0      | 0            | 0        | 0            | 0            | 0         | 0.784      | 0.784          |
| OCLN   | CLDN1   | 0            | 0      | 0            | 0        | 0            | 0            | 0.8       | 0.786      | 0.954          |
| ODC1   | MMP2    | 0            | 0      | 0            | 0        | 0            | 0            | 0         | 0.81       | 0.81           |
| ODC1   | CSNK2A1 | 0            | 0      | 0            | 0        | 0            | 0            | 0         | 0.817      | 0.817          |
| P2RY6  | ANXA1   | 0            | 0      | 0            | 0        | 0            | 0            | 0.9       | 0          | 0.899          |
| P2RY6  | PIK3R1  | 0            | 0      | 0            | 0        | 0            | 0            | 0.9       | 0          | 0.899          |
| P2RY6  | BDKRB2  | 0            | 0      | 0            | 0.775    | 0            | 0            | 0.9       | 0.104      | 0.9            |
| P2RY6  | PTAFR   | 0            | 0      | 0            | 0.756    | 0            | 0            | 0.9       | 0.167      | 0.902          |
| PAK4   | RAC3    | 0            | 0      | 0            | 0        | 0            | 0.9          | 0.8       | 0.464      | 0.987          |
| PAK4   | ITGAV   | 0            | 0      | 0            | 0        | 0            | 0.619        | 0         | 0.805      | 0.921          |
| PDK1   | PIK3R1  | 0            | 0      | 0            | 0        | 0            | 0            | 0.9       | 0          | 0.899          |
| PFAS   | PPAT    | 0.626        | 0      | 0            | 0        | 0.774        | 0            | 0         | 0.764      | 0.977          |
| PFDN2  | POLR2E  | 0            | 0      | 0            | 0        | 0.555        | 0            | 0         | 0.722      | 0.868          |
| PFKM   | PYGB    | 0            | 0      | 0            | 0        | 0.086        | 0            | 0         | 0.768      | 0.773          |
| PHGDH  | ASNS    | 0            | 0      | 0            | 0        | 0.52         | 0            | 0         | 0.449      | 0.718          |
| PHGDH  | SHMT2   | 0.077        | 0      | 0            | 0        | 0.402        | 0            | 0         | 0.812      | 0.882          |
| PI4K2A | PLCD3   | 0            | 0      | 0            | 0        | 0            | 0            | 0.9       | 0          | 0.899          |
| PI4K2A | PIK3R1  | 0            | 0      | 0            | 0        | 0            | 0            | 0.9       | 0          | 0.899          |
| PIK3R1 | EFNB2   | 0            | 0      | 0            | 0        | 0            | 0            | 0.9       | 0.078      | 0.901          |
| PIK3R1 | CSK     | 0            | 0      | 0            | 0.552    | 0            | 0            | 0.8       | 0          | 0.8            |
| PIK3R1 | ANXA1   | 0            | 0      | 0            | 0        | 0            | 0            | 0.9       | 0          | 0.899          |
| PIK3R1 | ITGAV   | 0            | 0      | 0            | 0        | 0            | 0            | 0.9       | 0          | 0.899          |
| PIK3R1 | NGFR    | 0            | 0      | 0            | 0        | 0            | 0            | 0.9       | 0          | 0.899          |
| PKD1   | CDH1    | 0            | 0      | 0            | 0        | 0            | 0.619        | 0         | 0.878      | 0.95           |
| PLAU   | MMP2    | 0            | 0      | 0            | 0        | 0            | 0            | 0         | 0.751      | 0.75           |
| PLAU   | PIK3R1  | 0            | 0      | 0            | 0        | 0            | 0            | 0.9       | 0.08       | 0.901          |
| PLAU   | FOSL1   | 0            | 0      | 0            | 0        | 0.149        | 0            | 0.9       | 0.346      | 0.936          |
| PLAU   | FOS     | 0            | 0      | 0            | 0        | 0            | 0            | 0.9       | 0.515      | 0.948          |
| PLAU   | JUND    | 0            | 0      | 0            | 0        | 0            | 0            | 0.9       | 0.274      | 0.922          |
| PLAU   | E2F1    | 0            | 0      | 0            | 0        | 0            | 0            | 0.9       | 0          | 0.899          |
| PLAU   | MRC2    | 0            | 0      | 0            | 0        | 0            | 0            | 0         | 0.885      | 0.885          |
| PLAU   | ITGAV   | 0            | 0      | 0            | 0        | 0            | 0            | 0.9       | 0.374      | 0.933          |
| PLCD3  | PIK3R1  | 0            | 0      | 0            | 0        | 0            | 0            | 0.9       | 0          | 0.899          |
| PLD1   | CHPT1   | 0            | 0      | 0            | 0        | 0            | 0            | 0.9       | 0          | 0.899          |
| PLK1   | CDC45   | 0            | 0      | 0            | 0        | 0.772        | 0            | 0         | 0.372      | 0.847          |
| PLK1   | RAD51   | 0            | 0      | 0            | 0        | 0.502        | 0            | 0         | 0.866      | 0.929          |
| PLK1   | CENPM   | 0            | 0      | 0            | 0        | 0.535        | 0            | 0.9       | 0.146      | 0.954          |
| PLK1   | CDC6    | 0            | 0      | 0            | 0        | 0.655        | 0.621        | 0         | 0.885      | 0.982          |
| PLK1   | NUF2    | 0            | 0      | 0            | 0        | 0.595        | 0            | 0.9       | 0.411      | 0.972          |
| PLK1   | CDC45   | 0            | 0      | 0            | 0        | 0.62         | 0            | 0         | 0.854      | 0.941          |
| PLK1   | NCAPH   | 0            | 0      | 0.303        | 0        | 0.632        | 0            | 0         | 0.235      | 0.7            |
| PLK1   | CENPK   | 0            | 0      | 0            | 0        | 0.303        | 0            | 0.9       | 0.179      | 0.934          |
| PLK1   | TRIP13  | 0            | 0      | 0            | 0        | 0.67         | 0            | 0         | 0.147      | 0.7            |
| PLOD2  | MLL5    | 0            | 0      | 0            | 0        | 0            | 0            | 0.9       | 0          | 0.899          |
| PLXNA2 | RAC3    | 0            | 0      | 0            | 0        | 0            | 0            | 0.8       | 0.144      | 0.817          |
| PNO1   | NIP7    | 0            | 0      | 0            | 0        | 0.907        | 0            | 0         | 0          | 0.907          |
| PNO1   | EMG1    | 0.199        | 0      | 0            | 0        | 0.826        | 0.645        | 0         | 0.32       | 0.959          |
| PNO1   | NAT10   | 0            | 0      | 0            | 0        | 0.769        | 0            | 0         | 0.478      | 0.871          |
| PNO1   | BYSL    | 0            | 0      | 0            | 0        | 0.84         | 0.541        | 0         | 0.291      | 0.941          |
| PNO1   | DIMT1L  | 0            | 0      | 0            | 0        | 0.841        | 0.66         | 0         | 0.144      | 0.947          |
| PNO1   | POLR1B  | 0            | 0      | 0            | 0        | 0.732        | 0            | 0         | 0          | 0.732          |
| PNP    | GDA     | 0.598        | 0      | 0            | 0        | 0.239        | 0            | 0.9       | 0.562      | 0.983          |
| PNP    | PYGB    | 0.146        | 0      | 0            | 0        | 0            | 0            | 0         | 0.672      | 0.702          |
| PNP    | UPP1    | 0            | 0      | 0            | 0        | 0            | 0            | 0.9       | 0.659      | 0.963          |
| POLR1B | BYSL    | 0            | 0      | 0            | 0        | 0.704        | 0            | 0         | 0          | 0.704          |
| POLR1B | NAT10   | 0            | 0      | 0            | 0        | 0.779        | 0            | 0         | 0          | 0.78           |
| POLR1B | DIMT1L  | 0            | 0      | 0            | 0        | 0.706        | 0            | 0         | 0          | 0.707          |
| POLR1B | POLR2E  | 0.268        | 0      | 0            | 0        | 0.397        | 0.508        | 0         | 0.392      | 0.84           |
| POLR1B | NIP7    | 0            | 0      | 0            | 0        | 0.796        | 0            | 0         | 0.197      | 0.825          |
| POLR3G | POLR2E  | 0            | 0      | 0            | 0        | 0.089        | 0.12         | 0.9       | 0.341      | 0.935          |
| POLR3G | POLR3K  | 0            | 0      | 0            | 0        | 0            | 0.096        | 0.9       | 0.23       | 0.92           |
| POLR3K | POLR2E  | 0            | 0      | 0            | 0        | 0.461        | 0.589        | 0.9       | 0.315      | 0.981          |
| PPAT   | ASNS    | 0.253        | 0      | 0            | 0        | 0            | 0            | 0         | 0.732      | 0.786          |
| PPAT   | MARS    | 0            | 0      | 0            | 0        | 0.256        | 0            | 0         | 0.648      | 0.721          |
| PRC1   | MCM6    | 0            | 0      | 0            | 0        | 0.828        | 0            | 0         | 0.236      | 0.86           |
| PRC1   | CENPM   | 0            | 0      | 0            | 0        | 0.767        | 0            | 0         | 0.125      | 0.783          |
| PRC1   | UBE2T   | 0            | 0      | 0            | 0        | 0.774        | 0            | 0         | 0          | 0.774          |
| PRC1   | RAD51   | 0            | 0      | 0            | 0        | 0.737        | 0            | 0         | 0.195      | 0.774          |
| PRC1   | GINS2   | 0            | 0      | 0            | 0        | 0.772        | 0            | 0         | 0.163      | 0.796          |
| PRC1   | KIF2C   | 0            | 0      | 0            | 0        | 0.887        | 0            | 0         | 0.369      | 0.924          |
| PRC1   | CDC45   | 0            | 0      | 0            | 0        | 0.909        | 0            | 0         | 0.197      | 0.922          |
| PRC1   | TRIP13  | 0            | 0      | 0            | 0        | 0.904        | 0            | 0         | 0.214      | 0.919          |
| PRC1   | PLK1    | 0            | 0      | 0            | 0        | 0.668        | 0.845        | 0.72      | 0.43       | 0.99           |
| PRC1   | NCAPH   | 0            | 0      | 0            | 0        | 0.848        | 0            | 0         | 0.181      | 0.868          |
| PRC1   | TACC3   | 0            | 0      | 0            | 0        | 0.716        | 0            | 0         | 0.235      | 0.768          |
| PRC1   | DNMT1   | 0            | 0      | 0            | 0        | 0.585        | 0            | 0         | 0.368      | 0.72           |
| PRC1   | MCM5    | 0            | 0      | 0            | 0        | 0.749        | 0            | 0         | 0.186      | 0.782          |
| PRC1   | AURKB   | 0            | 0      | 0            | 0        | 0.724        | 0            | 0         | 0.467      | 0.843          |
| PRC1   | DTL     | 0            | 0      | 0            | 0        | 0.875        | 0            | 0         | 0.159      | 0.888          |

| Node1    | Node2    | Neighborhood | Fusion | Cooccurrence | Homology | Coexpression | Experimental | Knowledge | Textmining | Combined_score |
|----------|----------|--------------|--------|--------------|----------|--------------|--------------|-----------|------------|----------------|
| RRM2     | CENPM    | 0            | 0      | 0            | 0        | 0.809        | 0            | 0         | 0          | 0.809          |
| RRM2     | RNASEH2A | 0            | 0      | 0            | 0        | 0.809        | 0            | 0         | 0          | 0.809          |
| RRM2     | NUF2     | 0            | 0      | 0            | 0        | 0.836        | 0            | 0         | 0.161      | 0.854          |
| RRM2     | HELLS    | 0            | 0      | 0            | 0        | 0.756        | 0            | 0         | 0.07       | 0.758          |
| RRM2     | PLK1     | 0            | 0      | 0            | 0        | 0.686        | 0            | 0         | 0.289      | 0.762          |
| RRM2     | RAD51    | 0            | 0      | 0            | 0        | 0.839        | 0            | 0         | 0.269      | 0.874          |
| RUNX1    | AREG     | 0            | 0      | 0            | 0        | 0            | 0            | 0         | 0.814      | 0.814          |
| RUNX1    | CCND2    | 0            | 0      | 0            | 0        | 0            | 0.621        | 0         | 0.273      | 0.705          |
| RUVBL1   | NAT10    | 0            | 0      | 0.376        | 0        | 0.554        | 0            | 0         | 0          | 0.703          |
| RUVBL1   | POLR2E   | 0            | 0      | 0            | 0        | 0.48         | 0.586        | 0         | 0.358      | 0.842          |
| RUVBL1   | HCFC1    | 0            | 0      | 0            | 0        | 0            | 0            | 0.9       | 0          | 0.899          |
| RUVBL1   | CENPK    | 0            | 0      | 0            | 0        | 0.109        | 0            | 0.9       | 0          | 0.904          |
| RUVBL1   | C21orf45 | 0            | 0      | 0            | 0        | 0.134        | 0            | 0.9       | 0          | 0.907          |
| S100A7   | RNASE7   | 0            | 0      | 0            | 0        | 0            | 0            | 0         | 0.75       | 0.75           |
| S100A8   | CSF3     | 0            | 0      | 0            | 0        | 0            | 0            | 0         | 0.829      | 0.829          |
| SDCCAG8  | PLK1     | 0            | 0      | 0            | 0        | 0            | 0            | 0.9       | 0.071      | 0.9            |
| SERPINE2 | PLAU     | 0            | 0      | 0            | 0        | 0            | 0.621        | 0         | 0.429      | 0.769          |
| SH3KBP1  | PIK3R1   | 0            | 0      | 0            | 0        | 0            | 0.981        | 0.9       | 0          | 0.998          |
| SHMT2    | FARSA    | 0.167        | 0      | 0            | 0        | 0.302        | 0            | 0         | 0.636      | 0.76           |
| SHMT2    | PPAT     | 0.107        | 0      | 0            | 0        | 0.483        | 0            | 0         | 0.52       | 0.748          |
| SIAH2    | SNCAIP   | 0            | 0      | 0            | 0        | 0            | 0.635        | 0         | 0.866      | 0.947          |
| SIAH2    | HIPK2    | 0            | 0      | 0            | 0        | 0            | 0.619        | 0         | 0.378      | 0.747          |
| SIRPA    | F3       | 0            | 0      | 0            | 0        | 0            | 0.937        | 0         | 0.102      | 0.94           |
| SLC16A2  | SLC6A15  | 0            | 0      | 0            | 0        | 0            | 0            | 0         | 0.778      | 0.778          |
| SLU7     | PIIG     | 0            | 0      | 0            | 0        | 0.229        | 0.998        | 0         | 0.086      | 0.998          |
| SMPD1    | TNFSF10  | 0            | 0      | 0            | 0        | 0            | 0            | 0.9       | 0.23       | 0.917          |
| SMPD1    | SMPD2    | 0            | 0      | 0            | 0        | 0            | 0            | 0.8       | 0.752      | 0.947          |
| SMPD1    | BIRC3    | 0            | 0      | 0            | 0        | 0            | 0            | 0.9       | 0.113      | 0.905          |
| SMPD1    | PIK3R1   | 0            | 0      | 0            | 0        | 0            | 0            | 0.9       | 0          | 0.899          |
| SMPD2    | NGFR     | 0            | 0      | 0            | 0        | 0            | 0            | 0.9       | 0.29       | 0.924          |
| SMPD2    | SORT1    | 0            | 0      | 0            | 0        | 0            | 0            | 0.9       | 0          | 0.899          |
| SNRNP70  | POLR2E   | 0            | 0      | 0            | 0        | 0.247        | 0            | 0.9       | 0          | 0.919          |
| SNRPA1   | SNRNP70  | 0            | 0      | 0            | 0        | 0.126        | 0.353        | 0.9       | 0.156      | 0.942          |
| SNRPA1   | POLR2E   | 0            | 0      | 0            | 0        | 0.397        | 0            | 0.9       | 0          | 0.935          |
| SNRPD1   | SNRNP70  | 0            | 0      | 0            | 0        | 0.076        | 0.911        | 0         | 0.517      | 0.955          |
| SNRPD1   | GEMIN5   | 0            | 0      | 0            | 0        | 0.125        | 0.596        | 0         | 0.477      | 0.789          |
| SNRPD1   | NIP7     | 0            | 0      | 0            | 0        | 0.779        | 0            | 0         | 0          | 0.779          |
| SORT1    | NGFR     | 0            | 0      | 0            | 0        | 0            | 0.741        | 0.9       | 0.898      | 0.997          |
| SQSTM1   | NGFR     | 0            | 0      | 0            | 0        | 0            | 0            | 0.9       | 0          | 0.899          |
| SQSTM1   | TARDBP   | 0            | 0      | 0            | 0        | 0            | 0.846        | 0         | 0.31       | 0.886          |
| SRGN     | SPARC    | 0            | 0      | 0            | 0        | 0            | 0            | 0.9       | 0          | 0.899          |
| SRM      | ODC1     | 0.508        | 0      | 0            | 0        | 0            | 0.144        | 0.9       | 0.822      | 0.99           |
| SUV39H1  | SIRT2    | 0            | 0      | 0            | 0        | 0            | 0            | 0.9       | 0.379      | 0.933          |
| SUV39H1  | PLOD2    | 0            | 0      | 0            | 0        | 0            | 0            | 0.9       | 0          | 0.899          |
| SUV39H1  | E2F1     | 0            | 0      | 0            | 0        | 0            | 0            | 0.9       | 0.119      | 0.905          |
| SUV39H1  | CCND3    | 0            | 0      | 0            | 0        | 0            | 0            | 0.9       | 0.112      | 0.905          |
| SUV39H1  | CDK4     | 0            | 0      | 0            | 0        | 0            | 0            | 0.9       | 0.242      | 0.919          |
| SUV39H1  | DNMT1    | 0            | 0      | 0            | 0        | 0            | 0.846        | 0         | 0.927      | 0.988          |
| SUV39H1  | FTSJ1    | 0            | 0      | 0            | 0        | 0.736        | 0            | 0         | 0          | 0.736          |
| SUV39H1  | CCND2    | 0            | 0      | 0            | 0        | 0            | 0            | 0.9       | 0.079      | 0.901          |
| SUV39H1  | RUNX1    | 0            | 0      | 0            | 0        | 0            | 0.845        | 0         | 0.838      | 0.973          |
| TACC3    | CDC45    | 0            | 0      | 0            | 0        | 0.796        | 0            | 0         | 0.119      | 0.808          |
| TACC3    | AURKB    | 0            | 0      | 0            | 0        | 0.554        | 0            | 0         | 0.379      | 0.704          |
| TACSTD2  | C1QBP    | 0            | 0      | 0            | 0        | 0            | 0            | 0         | 0.732      | 0.732          |
| TBL3     | BOP1     | 0            | 0      | 0            | 0.498    | 0.76         | 0            | 0         | 0.118      | 0.768          |
| TBL3     | PNO1     | 0            | 0      | 0            | 0        | 0.696        | 0            | 0         | 0.357      | 0.791          |
| TBL3     | BYSL     | 0            | 0      | 0            | 0        | 0.75         | 0.348        | 0         | 0.324      | 0.875          |
| TBL3     | EMG1     | 0            | 0      | 0            | 0        | 0.655        | 0.495        | 0         | 0.36       | 0.873          |
| TBL3     | NOC4L    | 0            | 0      | 0            | 0        | 0.765        | 0.344        | 0         | 0.249      | 0.868          |
| TBL3     | NAT10    | 0            | 0      | 0            | 0        | 0.792        | 0.493        | 0         | 0.366      | 0.924          |
| TBL3     | NIP7     | 0            | 0      | 0            | 0        | 0.723        | 0            | 0         | 0          | 0.723          |
| TCOF1    | NOP56    | 0            | 0      | 0            | 0        | 0.199        | 0.421        | 0         | 0.915      | 0.955          |
| TGFB2    | CDK4     | 0            | 0      | 0            | 0        | 0            | 0            | 0         | 0.82       | 0.82           |
| TGFB2    | CLU      | 0            | 0      | 0            | 0        | 0            | 0            | 0.9       | 0.085      | 0.902          |
| TGFB2    | SRGN     | 0            | 0      | 0            | 0        | 0            | 0            | 0.9       | 0          | 0.899          |
| TGFB2    | SPARC    | 0            | 0      | 0            | 0        | 0            | 0            | 0.9       | 0.22       | 0.916          |
| TGFB2    | MRC2     | 0            | 0      | 0            | 0        | 0            | 0            | 0.8       | 0          | 0.8            |
| TGFB2    | MMP2     | 0            | 0      | 0            | 0        | 0            | 0            | 0         | 0.859      | 0.859          |
| TIMM44   | TOMM40   | 0            | 0      | 0            | 0        | 0.251        | 0            | 0.9       | 0.752      | 0.978          |
| TIMP3    | MMP2     | 0            | 0      | 0            | 0        | 0.125        | 0.846        | 0         | 0.752      | 0.962          |
| TNC      | ITGAV    | 0            | 0      | 0            | 0        | 0            | 0            | 0.9       | 0.318      | 0.927          |
| TNC      | CDH1     | 0            | 0      | 0            | 0        | 0            | 0            | 0         | 0.878      | 0.878          |
| TP53INP1 | HIPK2    | 0            | 0      | 0            | 0        | 0            | 0.621        | 0         | 0.864      | 0.945          |
| TRIB3    | ASNS     | 0            | 0      | 0            | 0        | 0.45         | 0            | 0         | 0.502      | 0.707          |
| TUBB2C   | TUBA1C   | 0            | 0      | 0            | 0.922    | 0.124        | 0            | 0.8       | 0.378      | 0.817          |
| TUBB2C   | TUBA1B   | 0            | 0      | 0            | 0.922    | 0.348        | 0            | 0.8       | 0.129      | 0.861          |
| UBE2E2   | ISG15    | 0            | 0      | 0            | 0        | 0            | 0.846        | 0         | 0          | 0.846          |
| UBE2H    | RAD51    | 0            | 0      | 0            | 0        | 0            | 0            | 0         | 0.874      | 0.874          |
| UBE2T    | CENPM    | 0            | 0      | 0            | 0        | 0.732        | 0            | 0         | 0          | 0.732          |
| UBE2T    | CDCA5    | 0            | 0      | 0            | 0        | 0.886        | 0            | 0         | 0.104      | 0.89           |
| UBE2T    | CENPK    | 0            | 0      | 0            | 0        | 0.777        | 0            | 0         | 0          | 0.776          |
| UBE2T    | CDC45    | 0            | 0      | 0            | 0        | 0.868        | 0            | 0         | 0          | 0.867          |
| UBE2T    | CDC6     | 0            | 0      | 0            | 0        | 0.801        | 0            | 0         | 0          | 0.8            |
| UBE2T    | ATRIP    | 0            | 0      | 0            | 0        | 0            | 0            | 0.9       | 0          | 0.899          |
| UBE2T    | EXO1     | 0            | 0      | 0            | 0        | 0.812        | 0            | 0         | 0          | 0.812          |
| UBE2T    | TRIP13   | 0            | 0      | 0            | 0        | 0.719        | 0            | 0         | 0          | 0.718          |

| Node1    | Node2    | Neighborhood | Fusion | Cooccurrence | Homology | Coexpression | Experimental | Knowledge | Textmining | Combined score |
|----------|----------|--------------|--------|--------------|----------|--------------|--------------|-----------|------------|----------------|
| RRM2     | CENPM    | 0            | 0      | 0            | 0        | 0.809        | 0            | 0         | 0          | 0.809          |
| RRM2     | RNASEH2A | 0            | 0      | 0            | 0        | 0.809        | 0            | 0         | 0          | 0.809          |
| RRM2     | NUF2     | 0            | 0      | 0            | 0        | 0.836        | 0            | 0         | 0.161      | 0.854          |
| RRM2     | HELLS    | 0            | 0      | 0            | 0        | 0.756        | 0            | 0         | 0.07       | 0.758          |
| RRM2     | PLK1     | 0            | 0      | 0            | 0        | 0.686        | 0            | 0         | 0.289      | 0.762          |
| RRM2     | RAD51    | 0            | 0      | 0            | 0        | 0.839        | 0            | 0         | 0.269      | 0.874          |
| RUNX1    | AREG     | 0            | 0      | 0            | 0        | 0            | 0            | 0         | 0.814      | 0.814          |
| RUNX1    | CCND2    | 0            | 0      | 0            | 0        | 0            | 0.621        | 0         | 0.273      | 0.705          |
| RUVBL1   | NAT10    | 0            | 0      | 0.376        | 0        | 0.554        | 0            | 0         | 0          | 0.703          |
| RUVBL1   | POLR2E   | 0            | 0      | 0            | 0        | 0.48         | 0.586        | 0         | 0.358      | 0.842          |
| RUVBL1   | HCFC1    | 0            | 0      | 0            | 0        | 0            | 0            | 0.9       | 0          | 0.899          |
| RUVBL1   | CENPK    | 0            | 0      | 0            | 0        | 0.109        | 0            | 0.9       | 0          | 0.904          |
| RUVBL1   | C21orf45 | 0            | 0      | 0            | 0        | 0.134        | 0            | 0.9       | 0          | 0.907          |
| S100A7   | RNASE7   | 0            | 0      | 0            | 0        | 0            | 0            | 0         | 0.75       | 0.75           |
| S100A8   | CSF3     | 0            | 0      | 0            | 0        | 0            | 0            | 0         | 0.829      | 0.829          |
| SDCCAG8  | PLK1     | 0            | 0      | 0            | 0        | 0            | 0            | 0.9       | 0.071      | 0.9            |
| SERPINE2 | PLAU     | 0            | 0      | 0            | 0        | 0            | 0.621        | 0         | 0.429      | 0.769          |
| SH3KBP1  | PIK3R1   | 0            | 0      | 0            | 0        | 0            | 0.981        | 0.9       | 0          | 0.998          |
| SHMT2    | FARSA    | 0.167        | 0      | 0            | 0        | 0.302        | 0            | 0         | 0.636      | 0.76           |
| SHMT2    | PPAT     | 0.107        | 0      | 0            | 0        | 0.483        | 0            | 0         | 0.52       | 0.748          |
| SIAH2    | SNCAIP   | 0            | 0      | 0            | 0        | 0            | 0.635        | 0         | 0.866      | 0.947          |
| SIAH2    | HIPK2    | 0            | 0      | 0            | 0        | 0            | 0.619        | 0         | 0.378      | 0.747          |
| SIRPA    | F3       | 0            | 0      | 0            | 0        | 0            | 0.937        | 0         | 0.102      | 0.94           |
| SLC16A2  | SLC6A15  | 0            | 0      | 0            | 0        | 0            | 0            | 0         | 0.778      | 0.778          |
| SLU7     | PIIG     | 0            | 0      | 0            | 0        | 0.229        | 0.998        | 0         | 0.086      | 0.998          |
| SMPD1    | TNFSF10  | 0            | 0      | 0            | 0        | 0            | 0            | 0.9       | 0.23       | 0.917          |
| SMPD1    | SMPD2    | 0            | 0      | 0            | 0        | 0            | 0            | 0.8       | 0.752      | 0.947          |
| SMPD1    | BIRC3    | 0            | 0      | 0            | 0        | 0            | 0            | 0.9       | 0.113      | 0.905          |
| SMPD1    | PIK3R1   | 0            | 0      | 0            | 0        | 0            | 0            | 0.9       | 0          | 0.899          |
| SMPD2    | NGFR     | 0            | 0      | 0            | 0        | 0            | 0            | 0.9       | 0.29       | 0.924          |
| SMPD2    | SORT1    | 0            | 0      | 0            | 0        | 0            | 0            | 0.9       | 0          | 0.899          |
| SNRNP70  | POLR2E   | 0            | 0      | 0            | 0        | 0.247        | 0            | 0.9       | 0          | 0.919          |
| SNRPA1   | SNRNP70  | 0            | 0      | 0            | 0        | 0.126        | 0.353        | 0.9       | 0.156      | 0.942          |
| SNRPA1   | POLR2E   | 0            | 0      | 0            | 0        | 0.397        | 0            | 0.9       | 0          | 0.935          |
| SNRPD1   | SNRNP70  | 0            | 0      | 0            | 0        | 0.076        | 0.911        | 0         | 0.517      | 0.955          |
| SNRPD1   | GEMIN5   | 0            | 0      | 0            | 0        | 0.125        | 0.596        | 0         | 0.477      | 0.789          |
| SNRPD1   | NIP7     | 0            | 0      | 0            | 0        | 0.779        | 0            | 0         | 0          | 0.779          |
| SORT1    | NGFR     | 0            | 0      | 0            | 0        | 0            | 0.741        | 0.9       | 0.898      | 0.997          |
| SQSTM1   | NGFR     | 0            | 0      | 0            | 0        | 0            | 0            | 0.9       | 0          | 0.899          |
| SQSTM1   | TARDBP   | 0            | 0      | 0            | 0        | 0            | 0.846        | 0         | 0.31       | 0.886          |
| SRGN     | SPARC    | 0            | 0      | 0            | 0        | 0            | 0            | 0.9       | 0          | 0.899          |
| SRM      | ODC1     | 0.508        | 0      | 0            | 0        | 0            | 0.144        | 0.9       | 0.822      | 0.99           |
| SUV39H1  | SIRT2    | 0            | 0      | 0            | 0        | 0            | 0            | 0.9       | 0.379      | 0.933          |
| SUV39H1  | PLOD2    | 0            | 0      | 0            | 0        | 0            | 0            | 0.9       | 0          | 0.899          |
| SUV39H1  | E2F1     | 0            | 0      | 0            | 0        | 0            | 0            | 0.9       | 0.119      | 0.905          |
| SUV39H1  | CCND3    | 0            | 0      | 0            | 0        | 0            | 0            | 0.9       | 0.112      | 0.905          |
| SUV39H1  | CDK4     | 0            | 0      | 0            | 0        | 0            | 0            | 0.9       | 0.242      | 0.919          |
| SUV39H1  | DNMT1    | 0            | 0      | 0            | 0        | 0            | 0.846        | 0         | 0.927      | 0.988          |
| SUV39H1  | FTSJ1    | 0            | 0      | 0            | 0        | 0.736        | 0            | 0         | 0          | 0.736          |
| SUV39H1  | CCND2    | 0            | 0      | 0            | 0        | 0            | 0            | 0.9       | 0.079      | 0.901          |
| SUV39H1  | RUNX1    | 0            | 0      | 0            | 0        | 0            | 0.845        | 0         | 0.838      | 0.973          |
| TACC3    | CDC45    | 0            | 0      | 0            | 0        | 0.796        | 0            | 0         | 0.119      | 0.808          |
| TACC3    | AURKB    | 0            | 0      | 0            | 0        | 0.554        | 0            | 0         | 0.379      | 0.704          |
| TACSTD2  | C1QBP    | 0            | 0      | 0            | 0        | 0            | 0            | 0         | 0.732      | 0.732          |
| TBL3     | BOP1     | 0            | 0      | 0            | 0.498    | 0.76         | 0            | 0         | 0.118      | 0.768          |
| TBL3     | PNO1     | 0            | 0      | 0            | 0        | 0.696        | 0            | 0         | 0.357      | 0.791          |
| TBL3     | BYSL     | 0            | 0      | 0            | 0        | 0.75         | 0.348        | 0         | 0.324      | 0.875          |
| TBL3     | EMG1     | 0            | 0      | 0            | 0        | 0.655        | 0.495        | 0         | 0.36       | 0.873          |
| TBL3     | NOC4L    | 0            | 0      | 0            | 0        | 0.765        | 0.344        | 0         | 0.249      | 0.868          |
| TBL3     | NAT10    | 0            | 0      | 0            | 0        | 0.792        | 0.493        | 0         | 0.366      | 0.924          |
| TBL3     | NIP7     | 0            | 0      | 0            | 0        | 0.723        | 0            | 0         | 0          | 0.723          |
| TCOF1    | NOP56    | 0            | 0      | 0            | 0        | 0.199        | 0.421        | 0         | 0.915      | 0.955          |
| TGFB2    | CDK4     | 0            | 0      | 0            | 0        | 0            | 0            | 0         | 0.82       | 0.82           |
| TGFB2    | CLU      | 0            | 0      | 0            | 0        | 0            | 0            | 0.9       | 0.085      | 0.902          |
| TGFB2    | SRGN     | 0            | 0      | 0            | 0        | 0            | 0            | 0.9       | 0          | 0.899          |
| TGFB2    | SPARC    | 0            | 0      | 0            | 0        | 0            | 0            | 0.9       | 0.22       | 0.916          |
| TGFB2    | MRC2     | 0            | 0      | 0            | 0        | 0            | 0            | 0.8       | 0          | 0.8            |
| TGFB2    | MMP2     | 0            | 0      | 0            | 0        | 0            | 0            | 0         | 0.859      | 0.859          |
| TIMM44   | TOMM40   | 0            | 0      | 0            | 0        | 0.251        | 0            | 0.9       | 0.752      | 0.978          |
| TIMP3    | MMP2     | 0            | 0      | 0            | 0        | 0.125        | 0.846        | 0         | 0.752      | 0.962          |
| TNC      | ITGAV    | 0            | 0      | 0            | 0        | 0            | 0            | 0.9       | 0.318      | 0.927          |
| TNC      | CDH1     | 0            | 0      | 0            | 0        | 0            | 0            | 0         | 0.878      | 0.878          |
| TP53INP1 | HIPK2    | 0            | 0      | 0            | 0        | 0            | 0.621        | 0         | 0.864      | 0.945          |
| TRIB3    | ASNS     | 0            | 0      | 0            | 0        | 0.45         | 0            | 0         | 0.502      | 0.707          |
| TUBB2C   | TUBA1C   | 0            | 0      | 0            | 0.922    | 0.124        | 0            | 0.8       | 0.378      | 0.817          |
| TUBB2C   | TUBA1B   | 0            | 0      | 0            | 0.922    | 0.348        | 0            | 0.8       | 0.129      | 0.861          |
| UBE2E2   | ISG15    | 0            | 0      | 0            | 0        | 0            | 0.846        | 0         | 0          | 0.846          |
| UBE2H    | RAD51    | 0            | 0      | 0            | 0        | 0            | 0            | 0         | 0.874      | 0.874          |
| UBE2T    | CENPM    | 0            | 0      | 0            | 0        | 0.732        | 0            | 0         | 0          | 0.732          |
| UBE2T    | CDCA5    | 0            | 0      | 0            | 0        | 0.886        | 0            | 0         | 0.104      | 0.89           |
| UBE2T    | CENPK    | 0            | 0      | 0            | 0        | 0.777        | 0            | 0         | 0          | 0.776          |
| UBE2T    | CDC45    | 0            | 0      | 0            | 0        | 0.868        | 0            | 0         | 0          | 0.867          |
| UBE2T    | CDC6     | 0            | 0      | 0            | 0        | 0.801        | 0            | 0         | 0          | 0.8            |
| UBE2T    | ATRIP    | 0            | 0      | 0            | 0        | 0            | 0            | 0.9       | 0          | 0.899          |
| UBE2T    | EXO1     | 0            | 0      | 0            | 0        | 0.812        | 0            | 0         | 0          | 0.812          |
| UBE2T    | TRIP13   | 0            | 0      | 0            | 0        | 0.719        | 0            | 0         | 0          | 0.718          |



| Node1  | Node2   | Neighborhood | Fusion | Cooccurrence | Homology | Coexpression | Experimental | Knowledge | Textmining | Combined_score |
|--------|---------|--------------|--------|--------------|----------|--------------|--------------|-----------|------------|----------------|
| UBE2T  | RRM2    | 0            | 0      | 0            | 0        | 0.802        | 0            | 0         | 0          | 0.802          |
| UBE2T  | NUF2    | 0            | 0      | 0            | 0        | 0.91         | 0            | 0         | 0          | 0.909          |
| UBE2T  | AURKB   | 0            | 0      | 0            | 0        | 0.707        | 0            | 0         | 0          | 0.706          |
| UBE2T  | DTL     | 0            | 0      | 0            | 0        | 0.848        | 0            | 0         | 0          | 0.847          |
| UBE2T  | GINS2   | 0            | 0      | 0            | 0        | 0.738        | 0            | 0         | 0          | 0.738          |
| UBE2T  | MCM6    | 0            | 0      | 0            | 0        | 0.785        | 0            | 0         | 0          | 0.784          |
| UBE2T  | RAD51   | 0            | 0      | 0            | 0        | 0.772        | 0            | 0         | 0.113      | 0.784          |
| UBE2T  | NCAPH   | 0            | 0      | 0            | 0        | 0.723        | 0            | 0         | 0          | 0.722          |
| UBE2T  | MCM10   | 0            | 0      | 0            | 0        | 0.702        | 0            | 0         | 0          | 0.702          |
| UBIAD1 | SLC16A4 | 0            | 0      | 0            | 0        | 0            | 0            | 0.9       | 0          | 0.899          |
| UGCG   | PIK3R1  | 0            | 0      | 0            | 0        | 0            | 0            | 0.9       | 0          | 0.899          |
| UGCG   | SMPD2   | 0            | 0      | 0            | 0        | 0            | 0            | 0.9       | 0.541      | 0.951          |
| UGCG   | SMPD1   | 0            | 0      | 0            | 0        | 0            | 0            | 0.9       | 0.463      | 0.942          |
| USP8   | CHMP4C  | 0            | 0      | 0            | 0        | 0            | 0.839        | 0         | 0          | 0.839          |
| VAV3   | EFNA1   | 0            | 0      | 0            | 0        | 0            | 0            | 0.9       | 0.269      | 0.921          |
| VAV3   | ITGAV   | 0            | 0      | 0            | 0        | 0            | 0            | 0.9       | 0.297      | 0.924          |
| VAV3   | PIK3R1  | 0            | 0      | 0            | 0.498    | 0            | 0.845        | 0         | 0.086      | 0.847          |
| YARS   | FARSA   | 0.266        | 0      | 0            | 0        | 0.679        | 0            | 0         | 0.826      | 0.953          |
| YARS   | MARS    | 0            | 0.022  | 0            | 0        | 0.759        | 0            | 0         | 0.892      | 0.972          |
| YARS   | ASNS    | 0            | 0      | 0            | 0        | 0.61         | 0            | 0         | 0.412      | 0.756          |
| ZFP36  | DUSP1   | 0            | 0      | 0            | 0        | 0.828        | 0            | 0         | 0.068      | 0.829          |
| ZFP36  | EGR1    | 0            | 0      | 0            | 0        | 0.602        | 0            | 0         | 0.349      | 0.724          |
| ZNF593 | GTPBP4  | 0            | 0      | 0            | 0        | 0.592        | 0.465        | 0         | 0.188      | 0.798          |
| ZNF593 | NIP7    | 0            | 0      | 0            | 0        | 0.711        | 0            | 0         | 0          | 0.711          |
| ZNF593 | PNO1    | 0            | 0      | 0            | 0        | 0.741        | 0            | 0         | 0          | 0.742          |
| ZNF593 | BYSL    | 0            | 0      | 0            | 0        | 0.761        | 0            | 0         | 0          | 0.761          |
| ZNF622 | MYBL2   | 0            | 0      | 0            | 0        | 0            | 0.621        | 0         | 0.758      | 0.902          |

### Supplementary Table 3

**AURKA interacting proteins and MYC promoter binding proteins are shown.**

| AURKA interacting protein | MYC promoter region binding protein |                   |                |         |
|---------------------------|-------------------------------------|-------------------|----------------|---------|
| 16 KDA PROTEIN.           | $\alpha$ -Enolase                   | ETS-2             | MIBP1          | Smad-4  |
| 22 KDA PROTEIN.           | AhR                                 | FBI-1             | MSSP-1         | Sp1     |
| ACTA1                     | AP-1                                | FBP               | MSSP-2         | Sp3     |
| ACTA2                     | AP-2                                | FBP2              | Mxi1           | STAT1   |
| ACTB                      | AR                                  | FBP3              | NF1            | STAT3   |
| ACTIN-LIKE PROTEIN        | ARID1A                              | FIR               | NFATc1         | STAT4   |
| CAP1                      | $\beta$ -Catenin                    | FOXM1c            | NF- $\kappa$ B | STAT5   |
| CAP2                      | Blimp-1                             | FOXO3a            | NM23-H2        | TCF-4   |
| CDNA FLJ77784             | BMAL1/NPAS2                         | GATA-1            | Notch1         | THZif-1 |
| DDX17                     | B-Myb                               | $\gamma$ -Catenin | NSEP-1         | TR/RXR  |
| DDX3X                     | C/EBP $\alpha$                      | GR                | Oct            | USF     |
| DDX5                      | C/EBP $\beta$                       | hnRNP A1          | Ovol1          | WT1     |
| EEF2                      | c-Fos                               | hnRNP K           | p105/p115      | YY1     |
| EIF4B                     | c-Jun                               | HOXB4             | p30            | ZF5     |
| FUS                       | c-Myb                               | HOXB4             | p50            |         |
| HCCA2                     | c-Myc                               | ICAP-1            | p53            |         |
| HNRNPA1                   | CNBP                                | ID2               | p73            |         |
| HNRNPK                    | c-Rel                               | JunD              | p97            |         |
| HNRNPL                    | CSL                                 | KLF11             | Pitx2          |         |
| JAK1                      | CTCF                                | LEF-1             | PLZF           |         |
| PABPC1                    | CUT                                 | LR1               | PTTG           |         |
| PFKFB3                    | DP-1                                | Max               | PU.1           |         |
| PRMT5                     | E2F-1                               | MAZ               | Pur            |         |
| RARS                      | E2F-2                               | MAZi              | RelA           |         |
| STK38                     | E2F-3                               | MAZR              | RelB           |         |
| THOC4                     | E2F-4                               | MBP-1             | RFX1           |         |
| TUBB3                     | E2F-5                               | ME1a1             | RFX1           |         |
| TUBB4                     | E2F-6                               | ME1a2             | SATB1          |         |
| TUT1                      | ER                                  | Mel-18            | Smad-2         |         |
| WDR77                     | ETS-1                               | METS              | Smad3          |         |

#### Supplementary Table 4

The primers used in quantitative PCR are shown.

| Genes  | Forward Primer (5' > 3') | Reverse Primer (5' > 3') |
|--------|--------------------------|--------------------------|
| AURKA  | GGAATATGCACCACTTGGAACA   | TAAGACAGGGCATTGCGCAAT    |
| CCNA1  | ACATGGATGAACTAGAGCAGGG   | ACATGGATGAACTAGAGCAGGG   |
| CCNA2  | TGGAAAGCAAACAGTAAACAGCC  | GGGCATCTTCACGCTCTATTT    |
| CCND1  | GCTGCGAAGTGGAAACCATC     | CCTCCTTCTGCACACATTTGAA   |
| CCND2  | ACCTTCCGCAGTGCTCCTA      | CCCAGCCAAGAAACGGTCC      |
| CCND3  | TACCCGCCATCCATGATCG      | AGGCAGTCCACTTCAGTGC      |
| CCNE1  | ACTCAACGTGCAAGCCTCG      | GCTCAAGAAAGTGCTGATCCC    |
| CCNE2  | TCAAGACGAAGTAGCCGTTTAC   | TGACATCCTGGGTAGTTTTCTC   |
| CD24   | CTCCTACCCACGCAGATTTATTC  | AGAGTGAGACCACGAAGAGAC    |
| CD44   | CTGCCGCTTTGCAGGTGTA      | CATTGTGGGCAAGGTGCTATT    |
| CDC45  | TTCGTGTCCGATTTCCGCAA     | TGGAACCAGCGTATATTGCAC    |
| CDC6   | CCAGGCACAGGCTACAATCAG    | AACAGGTTACGGTTTGGACATT   |
| CDH1   | CGAGAGCTACACGTTACGG      | GGGTGTCGAGGGAAAAATAGG    |
| CDH2   | AGCCAACCTTAACTGAGGAGT    | GGCAAGTTGATTGGAGGGATG    |
| CDKN1A | TGTCCGTCAGAACCCATGC      | AAAGTCGAAGTTCCATCGCTC    |
| CDKN1B | TAATTGGGGCTCCGGCTAACT    | TGCAGGTCGCTTCCTTATTCC    |
| E2F1   | ACGTGACGIGTCAGGACCT      | GATCGGGCCTTGTTTGCTCTT    |
| MCM10  | AAGCCTTCTCTGGTCTGCG      | CTGTGGCGTAACCTTCTTCAA    |
| MCM2   | ATGGCGGAATCATCGGAATCC    | GGTGAGGGCATCAGTACGC      |
| MCM3   | GGCCTCCATTGATGCTACCTA    | GACGACTTTGGGACGAACTAG    |
| MCM5   | AGCATTCGTAGCCTGAAGTCG    | CGGCACTGGATAGAGATGCG     |
| MCM6   | GAGGAACTGATTCGTCCTGAGA   | CAAGGCCCGACACAGGTAAG     |
| MCM7   | GCCTGTGGGAAATATCCCTCG    | GTACCACCTGTCGGAACCC      |
| MYC    | GCCACGTCTCCACACATCAG     | TGGTGCATTTTCGGTTGTTG     |
| VIM    | GACGCCATCAACACCGAGTT     | CTTTGTCGTTGGTTAGCTGGT    |
| GAPDH  | TGCACCACCAACTGCTTAGC     | GGCATGGACTGTGGTCATGAG    |

## **SUPPLEMENTARY METHODS**

### **Immunofluorescence (IF) Analysis**

Cells ( $5 \times 10^3$  cells per well) were seeded into 6-well plate. The next day, cells were rinsed with ice-cold PBS and fixed with 5% paraformaldehyde for 10 min at RT. Then, cells were treated with 1% BSA (in PBS) plus 0.2% Triton X-100 for 15 min. Cells were subjected to immunofluorescence staining with indicated antibodies (1:200) for 1 h at RT. Cells were then washed with PBS three times for 10 min each. Cells were incubated with indicated secondary antibody (1:200) at RT for 1 h. Cells were washed with cold PBS three times for 10 min each, and incubated with DAPI (0.1  $\mu\text{g/ml}$ ) to stain the nucleus. The cells were examined by confocal microscopy (Olympus).
